# Supplementary material for: Phospho-signaling couples polar asymmetry and proteolysis within a membraneless microdomain in Caulobacter crescentus
Source: PubMed Central journal article supplement (PMC11519897; doi:10.1038/s41467-024-53395-y), 2024-10-28
Supplement: 41467_2024_53395_MOESM1_ESM.pdf [file 41467_2024_53395_MOESM1_ESM.pdf]

**Phospho-signaling couples polar asymmetry and proteolysis within a membraneless microdomain in *Caulobacter crescentus*.**

Yasin M Ahmed<sup>1</sup>, Logan M Brown<sup>2</sup>, Krisztina Varga<sup>2</sup>, Grant R Bowman<sup>1\*</sup>

1. Department of Molecular Biology, University of Wyoming, Laramie, WY 82071, USA
2. Department of Molecular, Cellular, and Biomedical Sciences, University of New Hampshire, Durham, NH 03824, USA

**Contents:**

1. Supplementary Figures
2. Supplementary Tables
3. Supplementary References

## Supplementary Figures

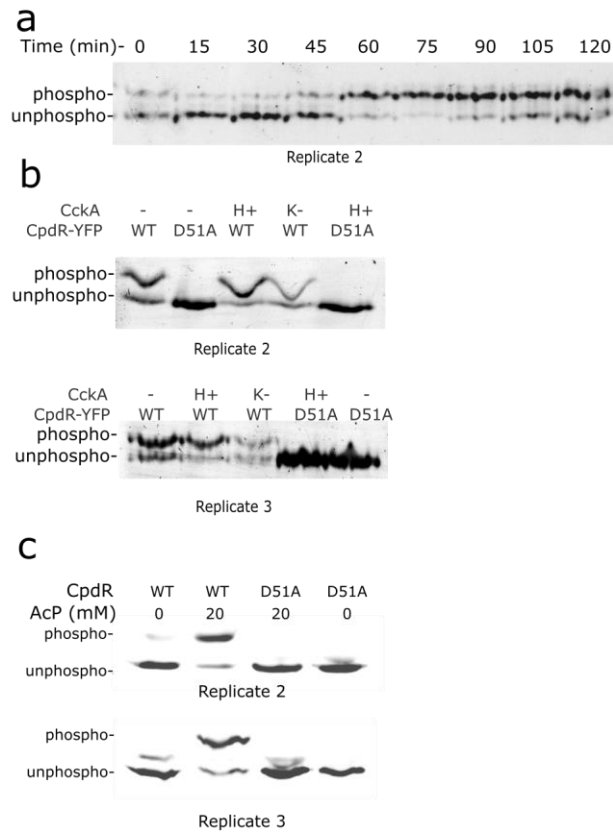

### Supplementary Fig. 1 | Phos-tag gel replicates for *C. crescentus* and *in vitro* experiments.

**a**, Additional replicate for Fig. 1c. **b**, Additional replicates for Fig. 1f. **c**, Additional replicates for Fig. 3c. Source data are provided as a Source Data file.

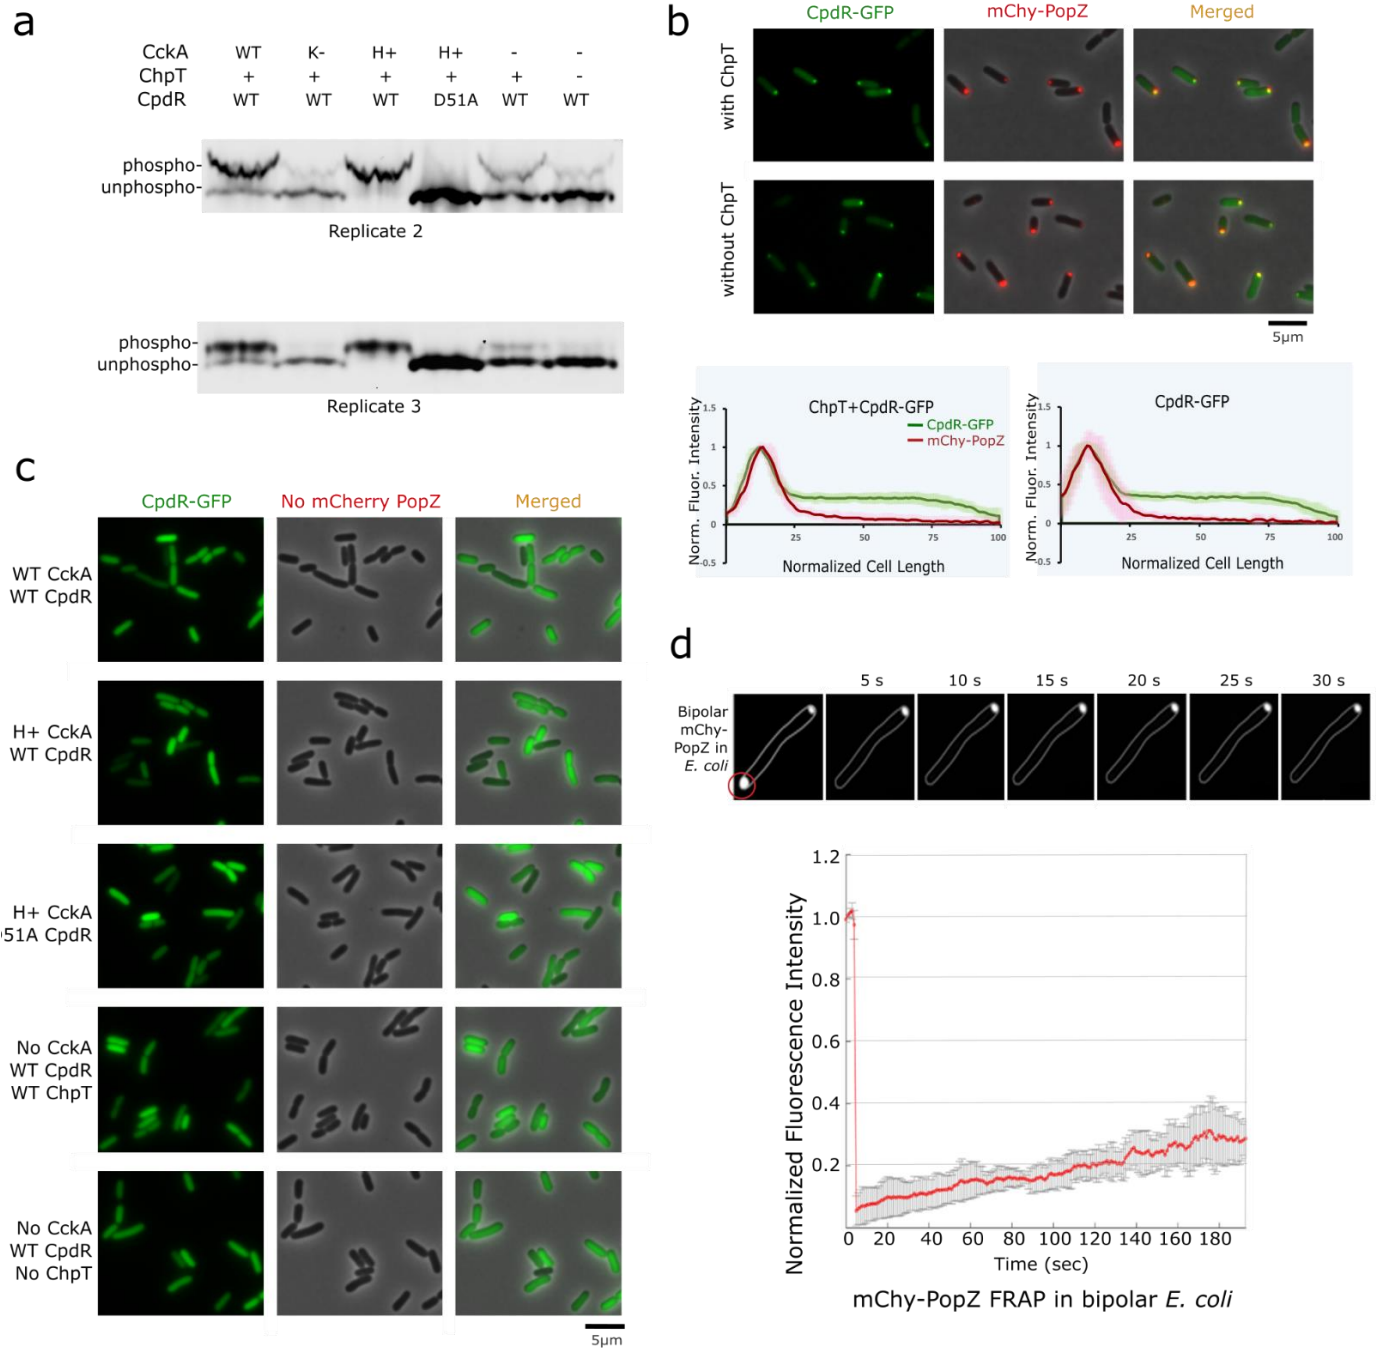

### Supplementary Fig. 2 | Protein localization and dynamics in *E. coli*.

**a**, Additional replicates for Fig. 2b. **b**, *E. coli* co-expression assay, with mChy-PopZ and CpdR-GFP expressed in the presence or absence of the intermediary phosphotransferase ChpT. mChy-PopZ and CpdR-GFP were observed by microscopy and normalized fluorescence intensities were plotted against cell length (graphs). **c**, *E. coli* co-expression assay, with different CckA, ChpT and

CpdR-GFP variants expressed in absence of mChy-PopZ. Images were taken in mChy and GFP channel. **d**, FRAP analysis of mChy-PopZ in *E. coli* cells with bipolar foci. Recovery of fluorescence was plotted against time in seconds. Source data are provided as a Source Data file.

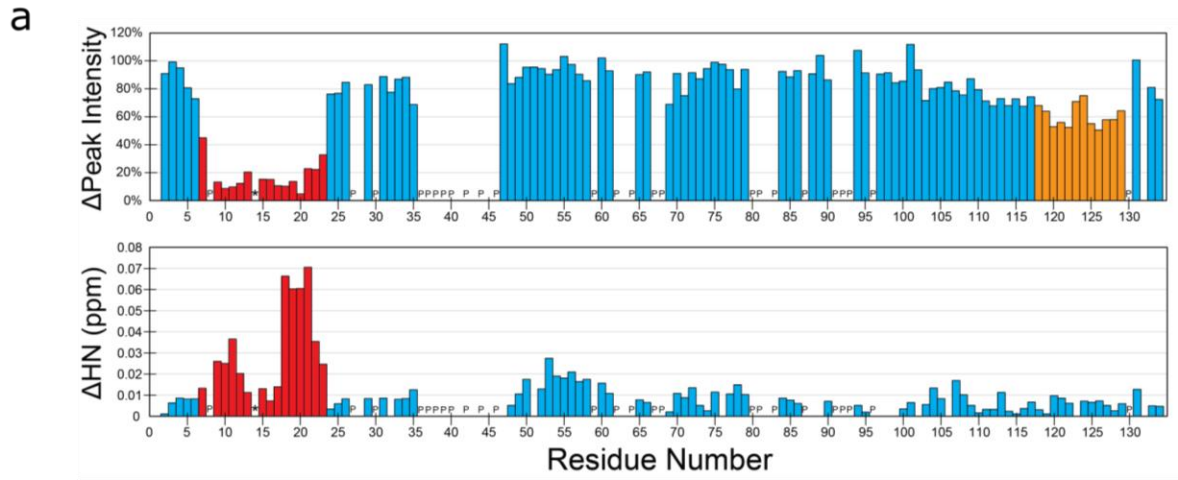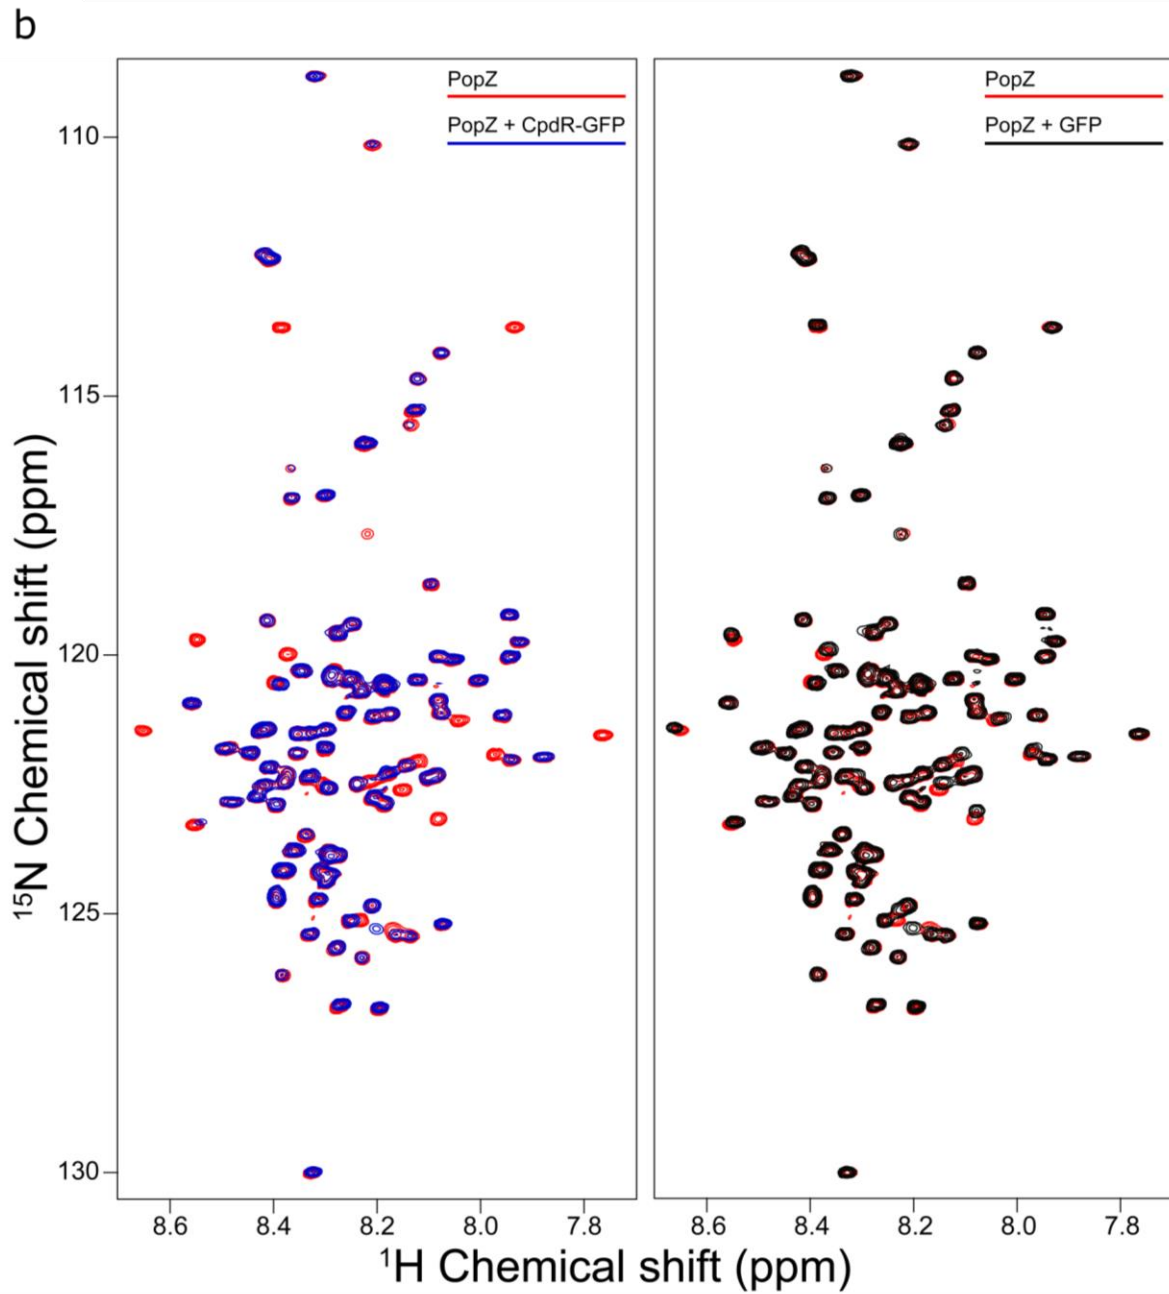

### Supplementary Fig. 3 | Chemical shift perturbations of PopZ $\Delta^{134-177}$ upon binding to CpdR-GFP.

**a**, Top graph: Signal attenuation resulting from the addition of 750  $\mu\text{M}$  CpdR-GFP to 50  $\mu\text{M}$  PopZ $\Delta^{134-177}$ . The changes in peak intensities were calculated as percentages relative to the peak intensities at the 0  $\mu\text{M}$  CpdR-GFP titration point (i.e., PopZ $\Delta^{134-177}$  peak intensity in the absence of binding protein). Bottom graph:  $\Delta\text{HN}$  combined chemical shift perturbations of PopZ $\Delta^{134-177}$  (50  $\mu\text{M}$ ) upon binding to 750  $\mu\text{M}$  CpdR-GFP as calculated by Equation 1. The most pronounced shifts, indicated in red, align well with the previously determined binding region of PopZ $\Delta^{134-177}$ . A potential secondary weak binding region is highlighted in orange in the top spectrum, where the peak intensity attenuation slightly exceeded one standard deviation, however no significant  $\Delta\text{HN}$  was observed for these residues. Note that Pro residues cannot be observed in  $^1\text{H}$ - $^{15}\text{N}$  HSQC spectra and are indicated with a "P" on the x-axis in both graphs. A few other resonances were either overlapped (indicated with an asterisk), could not be assigned, or were missing under the buffer conditions. **b**, Left panel:  $^1\text{H}$ - $^{15}\text{N}$  TROSY-HSQC NMR spectra overlay of 50  $\mu\text{M}$   $^{15}\text{N}$ -enriched PopZ $\Delta^{134-177}$  with and without its binding partner, CpdR-GFP: PopZ $\Delta^{134-177}$  only (i.e., 0  $\mu\text{M}$  CpdR-GFP) (red spectrum) and PopZ $\Delta^{134-177}$  with 750  $\mu\text{M}$  CpdR-GFP (blue spectrum). Right panel: In a control experiment, 750  $\mu\text{M}$  GFP was added to PopZ $\Delta^{134-177}$  (black spectrum) and overlaid with PopZ $\Delta^{134-177}$  spectrum (i.e., no binding partner, red spectrum). While PopZ $\Delta^{134-177}$  exhibits large chemical shift perturbations for selected residues upon the addition of CpdR-GFP, only minor changes were observed in the spectrum upon the addition of the same concentration of GFP, indicating that CpdR is the primary binding partner of PopZ $\Delta^{134-177}$ .

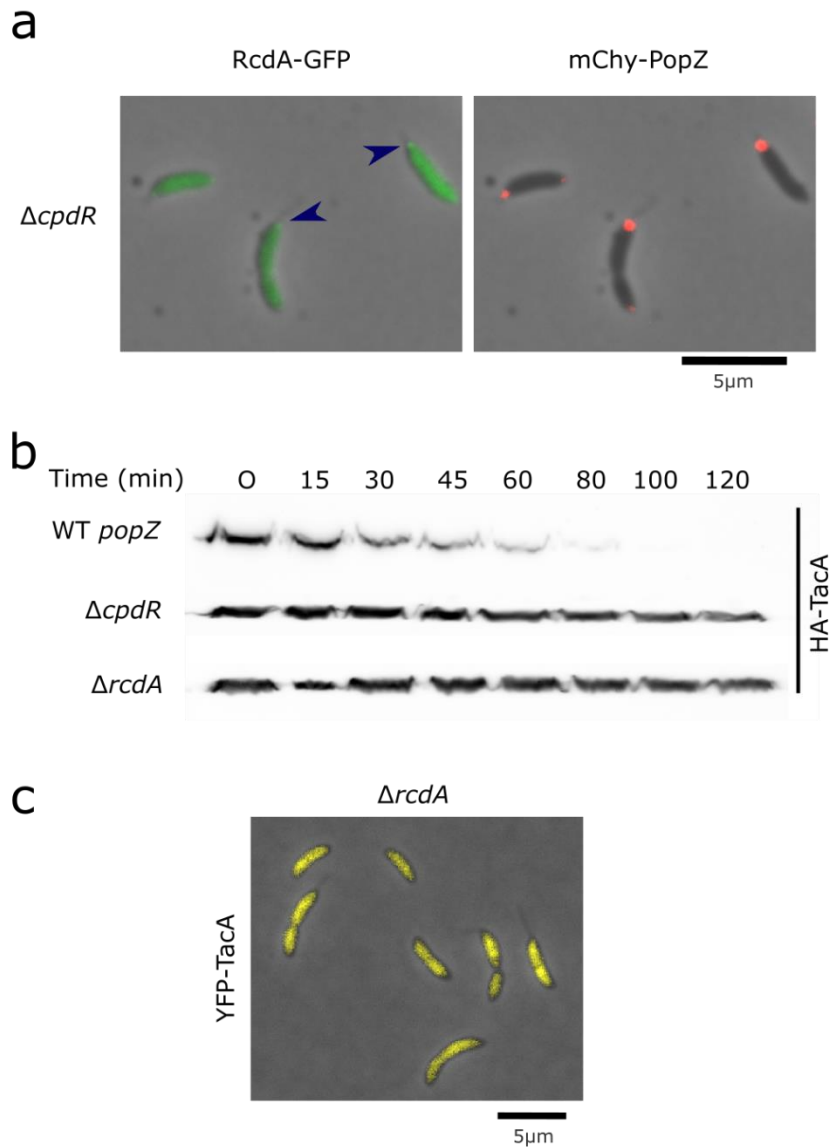

**Supplementary Fig. 4 | TacA requires CpdR and RcdA adaptors for proteolysis and polar localization.**

**a**, Faint foci of RcdA-GFP in  $\Delta cpdR$  strain (arrowheads) are difficult to discern and quantify. **b**, Degradation of HA-TacA following inducer wash-out in  $\Delta popZ$ ,  $\Delta cpdR$ , and  $\Delta rcdA$  *C. crescentus* strain backgrounds, observed by western blotting with  $\alpha$ -HA antibody. **c**, YFP-TacA localization in  $\Delta rcdA$  *C. crescentus* strain background. Source data are provided as a Source Data file.

**a**YFP-CtrA RD+15  
in  $\Delta popZ$  background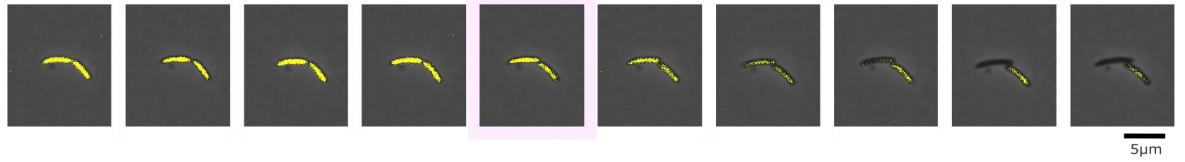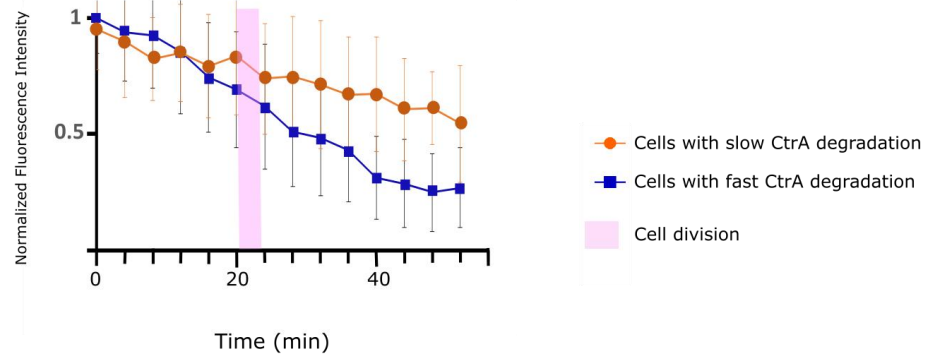**b**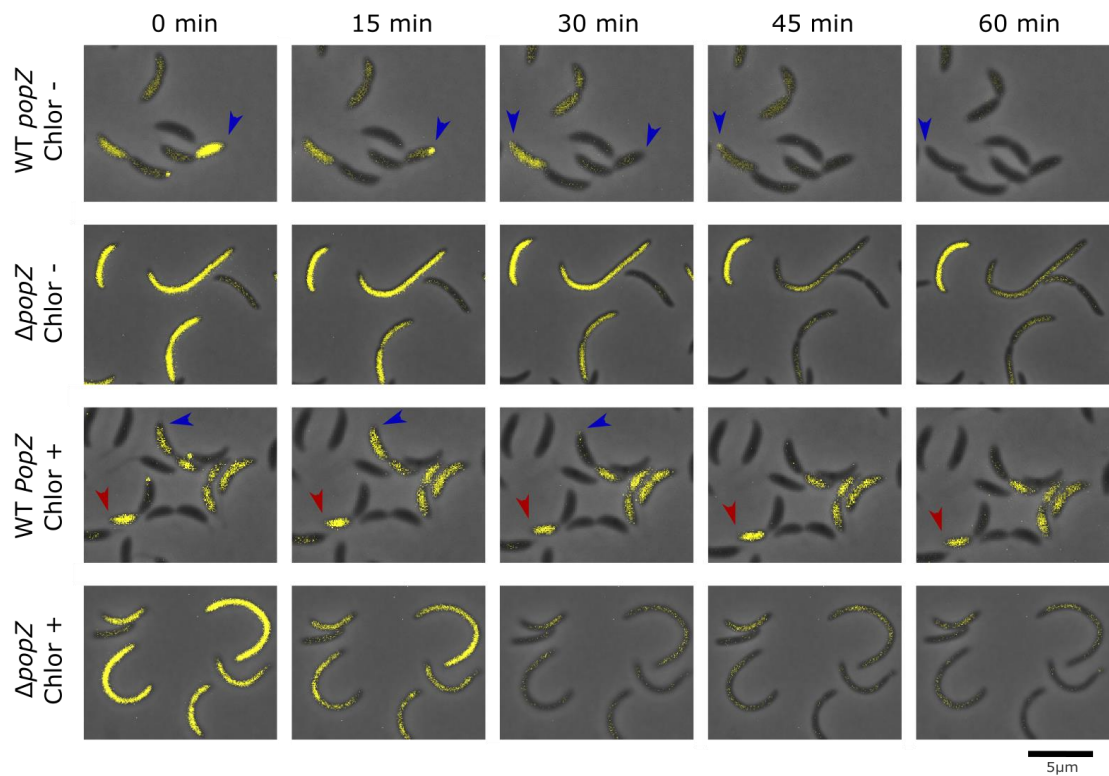**c**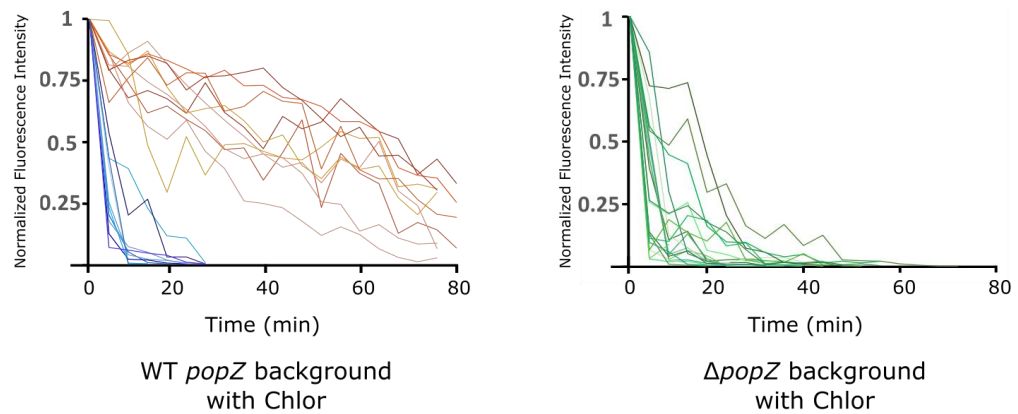



**Supplementary Fig. 5 | Substrate degradation in individual cells, in the presence and absence of chloramphenicol.**

**a**, Time-lapse images of YFP-tagged substrate localization in a  $\Delta popZ$  *C. crescentus* background, at 4 minute intervals. Pink bar indicates the time of cell separation. After accounting for photobleaching and temporally aligning the cells with respect to the time of cell separation (n=20), average fluorescence intensities for the faster and slower YFP-CtrA RD+15 degrading cells, normalized to maximum fluorescence intensity, were plotted against time (line graphs, bar = standard deviation). **b**, YFP-CtrA RD+15 distribution in WT and  $\Delta popZ$  *C. crescentus* stain backgrounds with and without chloramphenicol (chlor) treatment. Blue arrowheads mark cells that exhibit YFP-CtrA RD+15 polar foci and degradation. Red arrows mark cells that do not exhibit YFP-CtrA RD+15 polar foci or degradation. **c**, Average YFP fluorescence intensities of different cell bodies at 4 minute intervals, normalized to maximum fluorescence intensity, were plotted against time (line graphs), after accounting for photobleaching. Blue lines trace fluorescence intensity in WT cells that exhibit polar YFP foci during degradation (n=10), orange lines trace fluorescence intensity in WT cells that do not exhibit polar foci (n=10), and green lines trace fluorescence intensity in  $\Delta popZ$  cells (n=20). Source data are provided as a Source Data file.

a

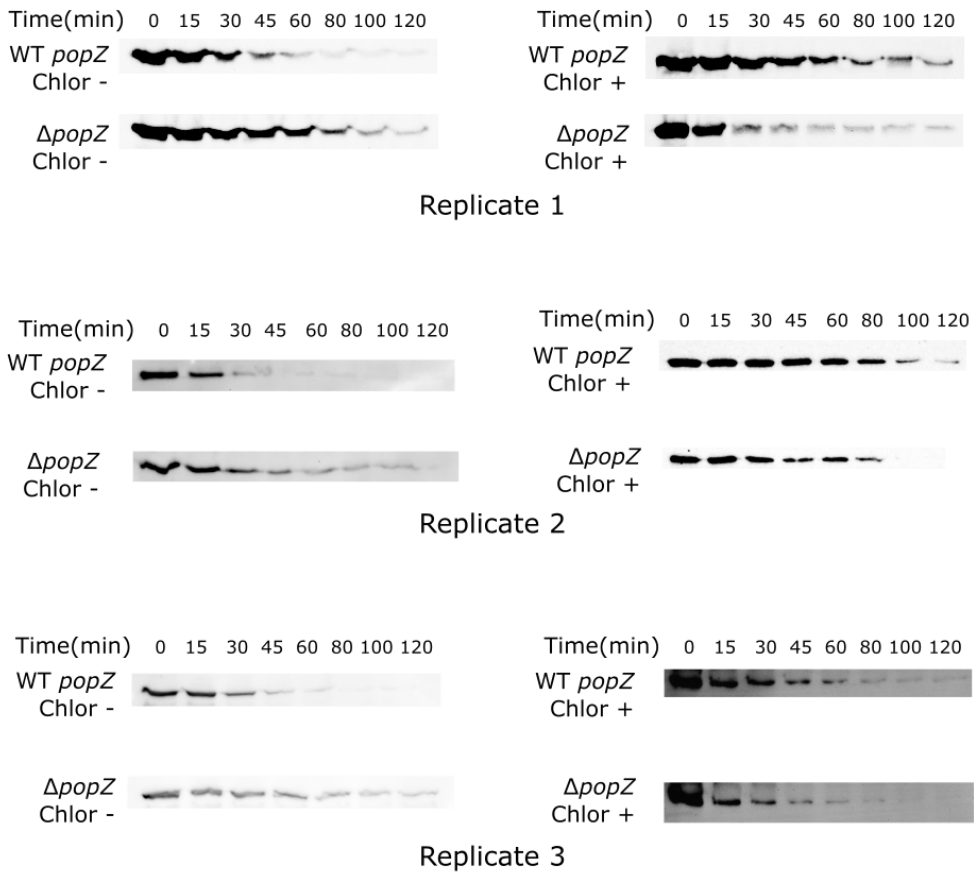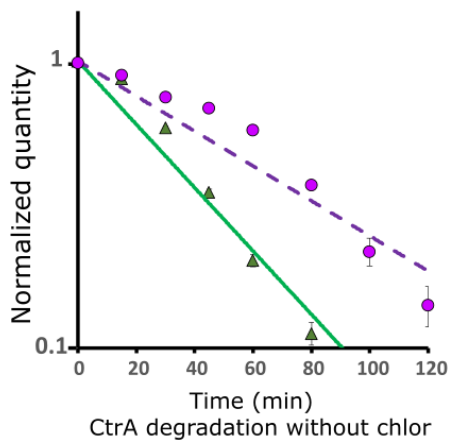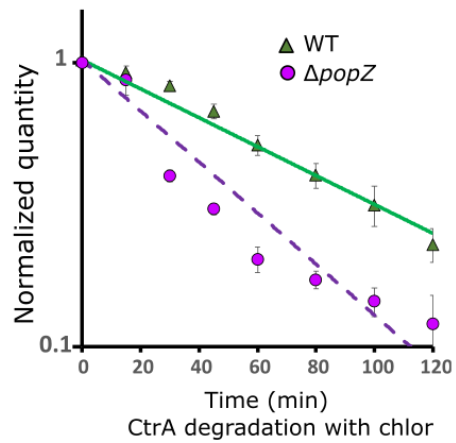

Supplementary Fig. 6 | Substrate degradation at the population level, in the presence and absence of chloramphenicol.

**a**, Degradation of YFP-CtrA RD+15 following inducer wash-out in wildtype and  $\Delta popZ$  strain backgrounds in the presence or absence of chloramphenicol treatment. Western blotting was performed with  $\alpha$ -GFP antibody (GeneTex GTX113617) at 1:3000. Three replicates are presented, and the average band intensities are plotted against time (bar=standard deviation). Source data are provided as a Source Data file.

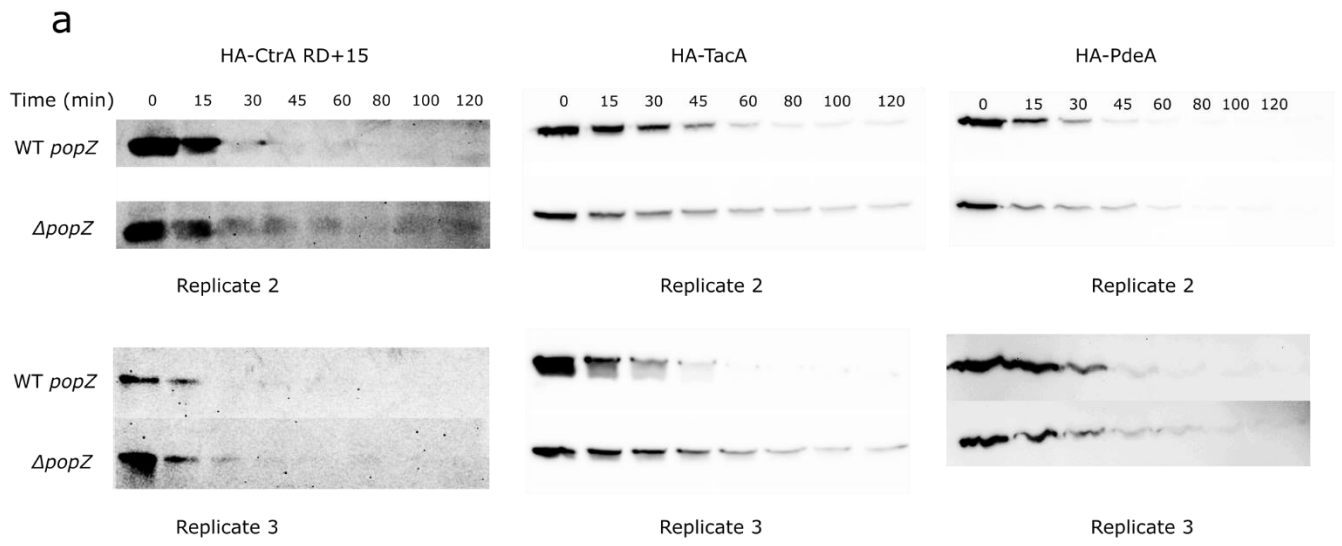

**Supplementary Fig. 7 | Degradation of HA-tagged proteolysis substrates following inducer wash-out.**

**a**, Additional replicates for Fig. 5c. Source data are provided as a Source Data file. Source data are provided as a Source Data file.

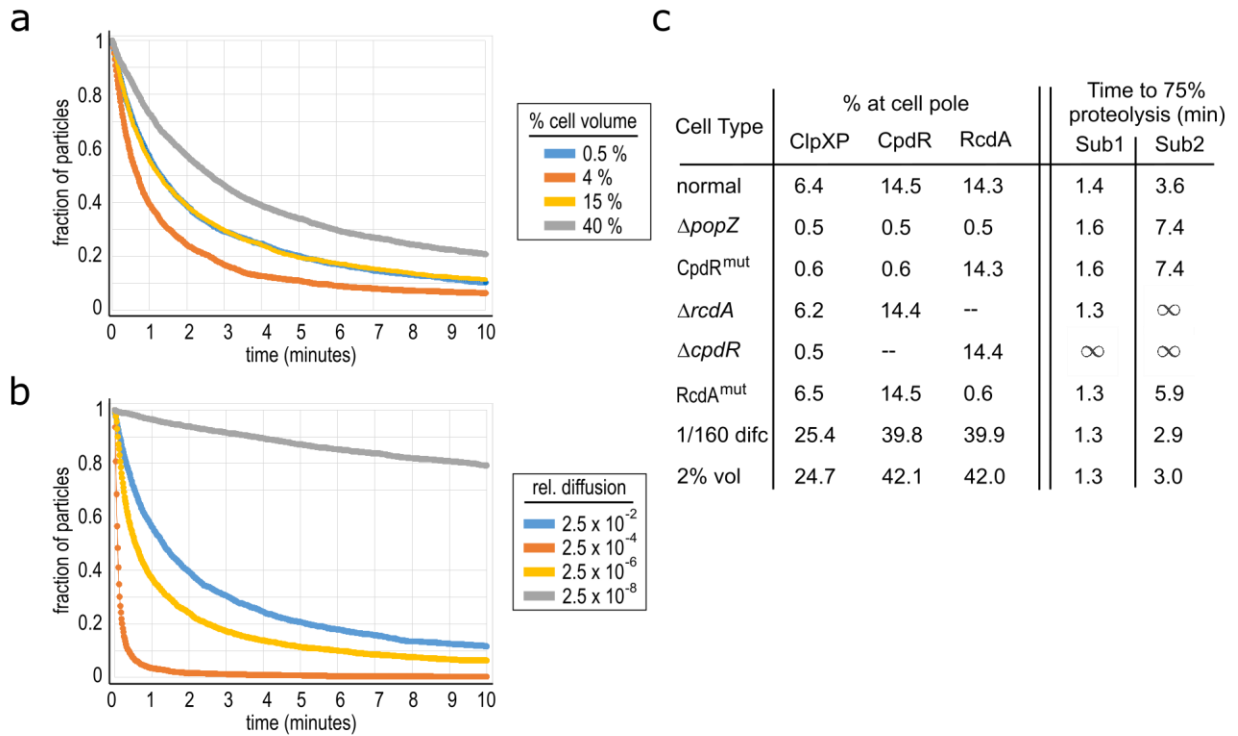

### Supplementary Fig. 8 | Conceptual models of substrate proteolysis in polar microdomains.

a-b, Three-dimensional reaction-diffusion simulations, as shown in Fig. 5a-b, except using different parameters. **a**, Cells with different sizes of polar microdomains, expressed as a percentage of total cell volume. 0.5% approximates the physiological size of PopZ microdomains in *C. crescentus*. At extremely large microdomain volumes, the reaction slows because particles are less concentrated in a large compartment with a relatively slow particle diffusion rate. **b**, Cells with polar microdomains that have different particle diffusion rates.  $2.5 \times 10^{-2}$  (or 1/40) approximates the physiological difference in protein diffusion rates in PopZ microdomains versus bulk cytoplasm in *C. crescentus*. Up to a point, slower diffusion rates lead to higher particle concentration and faster reaction rates. However, when particle diffusion in polar microdomains is extremely slow, most particles become stuck just below the microdomain surface and their collision frequency is low. **c**, Performance of the *C. crescentus* substrate proteolysis model, presented in Fig. 5c, under different conditions. The chart columns show the polar concentration of ClpXP, CpdR, and RcdA, expressed as the average percentage of total particles in polar microdomains over the course of the simulation, and the time needed to degrade 50% of substrates Sub1 and Sub2. “Normal” reports on a simulation that includes all components, with microdomain size, diffusion rates, and binding affinities at baseline values that approximate physiological conditions.  $\Delta popZ$ ,  $\Delta cpdR$ ,  $\Delta rcdA$ , report on

simulations run in the absence of these components. CpdR<sup>mut</sup> and RcdA<sup>mut</sup> report on the effects of selectively removing the interaction between the indicated adaptor protein and PopZ, by assigning them the rapid cytoplasmic rate of diffusion when that are located in polar microdomains. 1/160<sup>th</sup> difc and 2% vol report on simulations with slower polar microdomain diffusion rates or larger polar microdomain sizes, as described in Fig. 5b and 5a, respectively. Source data are provided as a Source Data file.

## Supplementary Tables

### Supplementary Table 1

| Strain name | Genotype / Background                                          | Plasmid description                            |             | Source     |
|-------------|----------------------------------------------------------------|------------------------------------------------|-------------|------------|
|             |                                                                | Replicating                                    | Integrating |            |
| GB#1194     | <i>Caulobacter</i> wildtype synchronizable strain NA1000 CB15N |                                                |             | 1          |
| GB#1081     | <i>Caulobacter</i> <i>popZ::specR</i>                          |                                                |             | 2          |
| GB#1007     | <i>Caulobacter</i> <i>popZ::mChy-popZ</i>                      |                                                |             | 3          |
| GB#264      | <i>Caulobacter</i> WT; GB#1194                                 | pMR10 YFP-CtrA RD+15                           |             | 4          |
| GB#228      | <i>Caulobacter</i> WT; GB#1194                                 | pMR11 pCpdR-CpdR-YFP                           |             | 5          |
| GB#944      | <i>E. coli</i> BL21 DE3                                        | pBad-mChy PopZ                                 |             | 6          |
| GB#169      | <i>E. coli</i> Rosetta                                         | pET28a-6XHis-PopZ                              |             | 2          |
| JH#66       | <i>E. coli</i> DH5 $\alpha$                                    | pBAD-6XHis-GFP                                 |             | 7          |
| GB#1969     |                                                                | pACYC-CpdR-TEV-msfGFP-6XHis                    |             | this study |
| GB#1970     |                                                                | pACYC-CpdR <sub>D51A</sub> -TEV-msfGFP-6XHis   |             | this study |
| GB#2022     | <i>E. coli</i> MG1655 DE3 <i>clpXP::kanR</i>                   |                                                |             | this study |
| GB#1971     | <i>E. coli</i> MG1655 DE3 <i>clpXP::kanR</i>                   | pACYC-CpdRGFP-ChpT-CckA WT + pBAD-mCherry PopZ |             | this study |
| GB#1972     | <i>E. coli</i> MG1655 DE3 <i>clpXP::kanR</i>                   | pACYC-CpdRGFP-ChpT-CckA H+ + pBAD-mCherry PopZ |             | this study |
| GB#1973     | <i>E. coli</i> MG1655 DE3 <i>clpXP::kanR</i>                   | pACYC-CpdRGFP-ChpT-CckA K- + pBAD-mCherry PopZ |             | this study |

|                |                                                           |                                                                    |                                           |            |
|----------------|-----------------------------------------------------------|--------------------------------------------------------------------|-------------------------------------------|------------|
| <b>GB#1974</b> | <i>E. coli</i> MG1655<br>DE3 <i>clpXP::kanR</i>           | pACYC-Cpd <sub>D51A</sub> GFP-ChpT-<br>CckA H+ + pBAD-mCherry PopZ |                                           | this study |
| <b>GB#1975</b> | <i>E. coli</i> MG1655<br>DE3 <i>clpXP::kanR</i>           | pACYC-CpdRGFP-ChpT + pBAD-<br>mCherry PopZ                         |                                           | this study |
| <b>GB#1976</b> | <i>E. coli</i> MG1655<br>DE3 <i>clpXP::kanR</i>           | pACYC-CpdRGFP + pBAD-<br>mCherry PopZ                              |                                           | this study |
| <b>GB#1977</b> | <i>E. coli</i> MG1655<br>DE3 <i>clpXP::kanR</i>           | pACYC-CpdRGFP + pBAD-<br>mCherry ΔN term PopZ                      |                                           | this study |
| <b>GB#1978</b> | <i>Caulobacter</i><br><i>popZ::mChy-popZ</i> ;<br>GB#1007 |                                                                    | pMCS5-pCpdR CpdR-YFP                      | this study |
| <b>GB#1979</b> | <i>Caulobacter</i><br><i>popZ::mChy-popZ</i> ;<br>GB#1007 |                                                                    | pMCS5-pCpdR CpdR <sub>D51A</sub> -<br>YFP | this study |
| <b>GB#1980</b> | <i>Caulobacter</i><br><i>popZ::mChy-popZ</i> ;<br>GB#1007 | pBXMCS2-CckA H+                                                    | pMCS5-pCpdR CpdR-YFP                      | this study |
| <b>GB#1981</b> | <i>Caulobacter</i><br><i>popZ::mChy-popZ</i> ;<br>GB#1007 | pBXMCS2-CckA K-                                                    | pMCS5-pCpdR CpdR-YFP                      | this study |
| <b>GB#1982</b> | <i>Caulobacter</i><br><i>popZ::mChy-popZ</i> ;<br>GB#1007 | pBXMCS2-CckA H+                                                    | pMCS5-pCpdR CpdR <sub>D51A</sub> -<br>YFP | this study |
| <b>GB#1983</b> | <i>Caulobacter</i> WT,<br>GB#1194                         |                                                                    | pXMCS5-YFP-CtrA RD+15                     | this study |
| <b>GB#1984</b> | <i>Caulobacter</i> WT,<br>GB#1194                         |                                                                    | pXMCS5-YFP-TacA                           | this study |
| <b>GB#1985</b> | <i>Caulobacter</i> WT,<br>GB#1194                         |                                                                    | pXMCS5-YFP-PdeA                           | this study |
| <b>GB#1986</b> | <i>Caulobacter</i><br><i>popZ::specR</i> ,<br>GB#1081     |                                                                    | pXMCS5-YFP-CtrA RD+15                     | this study |



|                |                                                                                   |  |                      |            |
|----------------|-----------------------------------------------------------------------------------|--|----------------------|------------|
| <b>GB#1987</b> | <i>Caulobacter</i><br><i>popZ::specR</i> ,<br>GB#1081                             |  | pXMCS5-YFP-TacA      | this study |
| <b>GB#1988</b> | <i>Caulobacter</i><br><i>popZ::specR</i> ,<br>GB#1081                             |  | pXMCS5-YFP-PdeA      | this study |
| <b>GB#1989</b> | <i>Caulobacter</i> WT,<br>GB#1194                                                 |  | pXMCS5-HA-CtrA RD+15 | this study |
| <b>GB#1990</b> | <i>Caulobacter</i> WT,<br>GB#1194                                                 |  | pXMCS5-HA-TacA       | this study |
| <b>GB#1991</b> | <i>Caulobacter</i> WT,<br>GB#1194                                                 |  | pXMCS5-HA-PdeA       | this study |
| <b>GB#1992</b> | <i>Caulobacter</i><br><i>popZ::specR</i> ,<br>GB#1081                             |  | pXMCS5-HA-CtrA RD+15 | this study |
| <b>GB#1993</b> | <i>Caulobacter</i><br><i>popZ::specR</i> ,<br>GB#1081                             |  | pXMCS5-HA-TacA       | this study |
| <b>GB#1994</b> | <i>Caulobacter</i><br><i>popZ::specR</i> ,<br>GB#1081                             |  | pXMCS5-HA-PdeA       | this study |
| <b>GB#1995</b> | <i>Caulobacter</i><br><i>cpdR::specR</i> ;<br><i>popZ::mChy-popZ</i>              |  |                      | this study |
| <b>GB#1996</b> | <i>Caulobacter</i><br>$\Delta$ <i>rcdA</i> , GB#1106 <sup>8</sup>                 |  | pMCS5-pCpdR CpdR-YFP | this study |
| <b>GB#1997</b> | <i>Caulobacter</i><br><i>cpdR::specR</i> ,<br><i>popZ::mChy-popZ</i> ;<br>GB#1995 |  | pVMCS6-ClpX-msfGFP   | this study |
| <b>GB#2002</b> | <i>Caulobacter</i><br><i>cpdR::specR</i> ,<br><i>popZ::mChy-popZ</i> ;<br>GB#1995 |  | pVMCS6-RcdA-msfGFP   | this study |

|                |                                                                                 |                                                    |                       |            |
|----------------|---------------------------------------------------------------------------------|----------------------------------------------------|-----------------------|------------|
| <b>GB#2007</b> | <i>Caulobacter</i><br><i>cpdR::specR,</i><br><i>popZ::mChy-popZ;</i><br>GB#1995 |                                                    | pXMCS5-YFP-CtrA RD+15 | this study |
| <b>GB#2008</b> | <i>Caulobacter</i><br><i>cpdR::specR,</i><br><i>popZ::mChy-popZ;</i><br>GB#1995 |                                                    | pXMCS5-YFP-TacA       | this study |
| <b>GB#2009</b> | <i>Caulobacter</i><br><i>cpdR::specR,</i><br><i>popZ::mChy-popZ;</i><br>GB#1995 |                                                    | pXMCS5-YFP-PdeA       | this study |
| <b>GB#2014</b> | <i>Caulobacter</i><br><i>cpdR::specR,</i><br><i>popZ::mChy-popZ;</i><br>GB#1995 | pBXMCS2-pCpdR CpdR                                 | pVMCS6-ClpX-GFP       | this study |
| <b>GB#2015</b> | <i>Caulobacter</i><br><i>cpdR::specR,</i><br><i>popZ::mChy-popZ;</i><br>GB#1995 | pBXMCS2-pCpdR CpdR <sub>D51A</sub>                 | pVMCS6-ClpX-GFP       | this study |
| <b>GB#2016</b> | <i>Caulobacter</i><br><i>cpdR::specR,</i><br><i>popZ::mChy-popZ;</i><br>GB#1995 | pBXMCS2-pXyl-CckA H+ pCpdR<br>CpdR                 | pVMCS6-ClpX-GFP       | this study |
| <b>GB#2017</b> | <i>Caulobacter</i><br><i>cpdR::specR,</i><br><i>popZ::mChy-popZ;</i><br>GB#1995 | pBXMCS2-pXyl-CckA H+ pCpdR<br>CpdR <sub>D51A</sub> | pVMCS6-ClpX-GFP       | this study |
| <b>GB#2018</b> | <i>Caulobacter</i><br><i>cpdR::specR,</i><br><i>popZ::mChy-popZ;</i><br>GB#1995 | pBXMCS2-pCpdR CpdR                                 | pVMCS6-RcdA-GFP       | this study |
| <b>GB#2019</b> | <i>Caulobacter</i><br><i>cpdR::specR,</i><br><i>popZ::mChy-popZ;</i><br>GB#1995 | pBXMCS2-pCpdR CpdR <sub>D51A</sub>                 | pVMCS6-RcdA-GFP       | this study |
| <b>GB#2020</b> | <i>Caulobacter</i><br><i>cpdR::specR,</i>                                       | pBXMCS2-pXyl-CckA H+ pCpdR<br>CpdR                 | pVMCS6-RcdA-GFP       | this study |

|                |                                                                                   |                                                    |                 |            |
|----------------|-----------------------------------------------------------------------------------|----------------------------------------------------|-----------------|------------|
|                | <i>popZ::mChy-popZ</i> ;<br>GB#1995                                               |                                                    |                 |            |
| <b>GB#2021</b> | <i>Caulobacter</i><br><i>cpdR::specR</i> ,<br><i>popZ::mChy-popZ</i> ;<br>GB#1995 | pBXMCS2-pXyl-CckA H+ pCpdR<br>CpdR <sub>D51A</sub> | pVMCS6-RcdA-GFP | this study |

Supplementary Table 2

| Plasmid name | Vector backbone | Description     | Sequence<br><small>*where present, ellipsis correspond to vector backbone sequence</small>                                                                                                                                                                                                                                                                                                                                                                                                                                                                                                                                                                                                                                                                                                                                                                                                                                                                                                                                                                                                                                                                                                                                                                                                                                                                                                                                                                                                                                                                                                                                                                                                                                                                                                                                                                                                                                                                                                                                                                                                                                                                                                                                                                                                                               |
|--------------|-----------------|-----------------|--------------------------------------------------------------------------------------------------------------------------------------------------------------------------------------------------------------------------------------------------------------------------------------------------------------------------------------------------------------------------------------------------------------------------------------------------------------------------------------------------------------------------------------------------------------------------------------------------------------------------------------------------------------------------------------------------------------------------------------------------------------------------------------------------------------------------------------------------------------------------------------------------------------------------------------------------------------------------------------------------------------------------------------------------------------------------------------------------------------------------------------------------------------------------------------------------------------------------------------------------------------------------------------------------------------------------------------------------------------------------------------------------------------------------------------------------------------------------------------------------------------------------------------------------------------------------------------------------------------------------------------------------------------------------------------------------------------------------------------------------------------------------------------------------------------------------------------------------------------------------------------------------------------------------------------------------------------------------------------------------------------------------------------------------------------------------------------------------------------------------------------------------------------------------------------------------------------------------------------------------------------------------------------------------------------------------|
| pGB1945      | pCDF-duet       | pCDF-CckA<br>WT | <p>gagatataaccATGGCCGACTTGCAGCTCCAGGACAAGGTTTCGACCGGCGCCCCGCGTCGGCGGTTT<br/> GATCCATGGCTGGTGGCGCGGCGGTGTTTTTCGTGGCTGCGGCGGCCCTCTCGGCGGCGCCGG<br/> CGCTCAAGGCCGGACCGACCACTGGCCGGCCTGCTGCTGCTTCTGGGCGTCGCGGGCGTGGC<br/> TGTGTTGGCCTTGTGCGCATTGCGGGCTCAGCGCTTTCGCGCGGCGACGCCAGCAGGCTGAG<br/> GGGTTTCATCGAGGCGCTGGCCGAGCCGGCCCTGGCCGCCGCGACGGTTCGCGTCTGGCCG<br/> CCAACGGGCCCTGGCGCGAAGTCATGGGCGAACAGCGCCCTGCCAAGGGCGTGGCGGGCT<br/> CCAGCCTGTTTGGCGCCCTGGTCCAGGCGCGCAGGGGCGAGATGGCCGAGGGCATGCTGAGCGC<br/> TGGAGGAACCGACTATACCGCAAGGTCTCGCGCCTTGGGGCGGACGGCTGATGATCCGGCTTG<br/> CGCCATCGTTGTGCTGAGCCGTTGTGGAAGACGCGTCGCCGGCCCCGGTCCCGAGCGCGC<br/> CGCCCCGCCACCCAGCTCGCTGGACGCCTTCGCCGAGCCTCGCCGTTGGCGCGGCCCTGCTGG<br/> AAGCCTGGAGCCGTTACCTCGCGGTGCTGGAGACCAATCCGGCGCTGACCACGATGACCGG<br/> CGCAAGGCCGGTGTGCTGTTCCGGCGATCTGATCGACGCCCTCGCGCGCCGAGGCCGAGACG<br/> CGCTGAACGAAGGCCGCGCCGTTCCCTACGAGGTGCGGTTGGCGCGCGATCCGTCGCGCATCG<br/> CTCACCTTACCTCTATCGCGCCGAAGGCCGCTGGTGGCCTACATGATCGACGTGTCCGAGCAGA<br/> AGCAGATCGAGCTGCAGCTGTCCAGGCCAGAAAGATGCAGGCCATCGCCAGCTGGCCGGCGG<br/> CGTCGCGCACGACTTCAACAACCTTTGACCGCCATCCAGCTGCGTCTGGACGAGTTGCTGCATCG<br/> CCATCCCGTGGTATCCGTCGTACGAGGGTCTCAACGAGATCCGTCAGACGGGCGTGCAGCGCCG<br/> CCGACCTCGTGCAGCAAGCTCTTGGCTTCTCGCGCAAGCAGACCGTGCAGCGCGAGGTGCTGGAT<br/> CTGGGCGAGCTGATCAGCGAGTTCGAGGTCTTGTGCGCCGCTGCTGCGCGAAGACGTCAAGC<br/> TGATCACCGACTATGGCCGCGACCTGCCGAGGTGCGCGCCACAAGAGCCAGCTCGAGACGGC<br/> GGTCATGAACCTGGCCGTCAACGCCCGCGACCCGTGCGCGCGGCCAAGGGCGGCGGCGTCTGT<br/> GCGCATCCGCACCGCGCGCCTGACCCGCGACGAGGCATCCAGCTGGGTTTCCCGGCCCGGAC<br/> GGCGACACGGCCTTCATTGAGGTGAGTACGATGGTCCGGGCATTCCGCCGACGTATGGGCAA<br/> GATCTTCGACCCGTTCTTACCACCAAGCCGGTGGGCGAGGGTACGGGCTAGGCCTAGCCACGG<br/> TCTATGGCATCGTTAAGCAGAGCGACGGCTGGATTACGTCCACAGCCGTCGAACGAAGGCCGCG<br/> GCCTTCCGATCTTCTGCCGTTATGAAGCGCCCGCGGCGGTCGCGCTCCAGGCCGTCGCG<br/> CGAGCCCGCAAGCCGCGCGCCGCTCGCGACCTGTCGGGCGCCGGCCGATCCTGTTGTCGAG<br/> GACGAGGACCGCTGCGCAGCGTCGCCGCCGCTGCTGCGCGCCGTTGGTACGAGGTGCTTG<br/> AGGCGGCCGACGGCGAAGAGGCCCTGATCATCGCCGAGGAAAACGCCGGCACGATCGACCTCTT<br/> GATCAGCGACGTGATCATGCCGGCATCGACGGCCGACCTTGTGAAGAAGGCGCGTGGCTATC<br/> TGGGGACCGCGCCGGTATGTTTCATCTCCGGTATGCCGAGGCCGAGTTCAGCGACCTCTGGAA<br/> GGCGAGACGGGCGTGACCTTCTCCCAAGCCGATCGACATCAAGACCCTGGCCGAGCGCGTCA<br/> AGCAGCAGCTGCAGGCGGCGTAGgcgccgcat</p> |
| pGB1946      | pCDF-duet       | pCDF-CckA<br>H+ | <p>gagatataaccATGGCCGACTTGCAGCTCCAGGACAAGGTTTCGACCGGCGCCCCGCGTCGGCGGTTT<br/> GATCCATGGCTGGTGGCGCGGCGGTGTTTTTCGTGGCTGCGGCGGCCCTCTCGGCGGCGCCGG<br/> CGCTCAAGGCCGGACCGACCACTGGCCGGCCTGCTGCTGCTTCTGGGCGTCGCGGGCGTGGC<br/> TGTGTTGGCCTTGTGCGCATTGCGGGCTCAGCGCTTTCGCGCGGCGACGCCAGCAGGCTGAG<br/> GGGTTTCATCGAGGCGCTGGCCGAGCCGGCCCTGGCCGCCGCGACGGTTCGCGTCTGGCCG<br/> CCAACGGGCCCTGGCGCGAAGTCATGGGCGAACAGCGCCCTGCCAAGGGCGTGGCGGGCT<br/> CCAGCCTGTTTGGCGCCCTGGTCCAGGCGCGCAGGGGCGAGATGGCCGAGGGCATGCTGAGCGC<br/> TGGAGGAACCGACTATACCGCAAGGTCTCGCGCCTTGGGGCGGACGGCTGATGATCCGGCTTG<br/> CGCCATCGTTGTGCTGAGCCGTTGTGGAAGACGCGTCGCCGGCCCCGGTCCCGAGCGCGC<br/> CGCCCCGCCACCCAGCTCGCTGGACGCCTTCGCCGAGCCTCGCCGTTGGCGCGGCCCTGCTGG<br/> AAGCCTGGAGCCGTTACCTCGCGGTGCTGGAGACCAATCCGGCGCTGACCACGATGACCGG<br/> CGCAAGGCCGGTGTGCTGTTCCGGCGATCTGATCGACGCCCTCGCGCGCCGAGGCCGAGACG<br/> CGCTGAACGAAGGCCGCGCCGTTCCCTACGAGGTGCGGTTGGCGCGCGATCCGTCGCGCATCG<br/> CTCACCTTACCTCTATCGCGCCGAAGGCCGCTGGTGGCCTACATGATCGACGTGTCCGAGCAGA<br/> AGCAGATCGAGCTGCAGCTGTCCAGGCCAGAAAGATGCAGGCCATCGCCAGCTGGCCGGCGA<br/> AGTCGCGCACGACTTCAACAACCTTTGACCGCCATCCAGCTGCGTCTGGACGAGTTGCTGCATCG<br/> CCATCCCGTGGTATCCGTCGTACGAGGGTCTCAACGAGATCCGTCAGACGGGCGTGCAGCGCCG<br/> CCGACCTCGTGCAGCAAGCTCTTGGCTTCTCGCGCAAGCAGACCGTGCAGCGCGAGGTGCTGGAT</p>                                                                                                                                                                                                                                                                                                                                                                                                                                                                                                                                                                                                                                                                                                                                                                                                                                                                                                                                                                                                                                |

|                       |                  |                         |                                                                                                                                                                                                                                                                                                                                                                                                                                                                                                                                                                                                                                                                                                                                                                                                                                                                                                                                                                                                                                                                                                                                                                                                                                                                                                                                                                                                                                                                                                                                                                                                                                                                                                                                                                                                                                                                                                                                                                                                                                                                                                                                                                                                                                                                                                                                |
|-----------------------|------------------|-------------------------|--------------------------------------------------------------------------------------------------------------------------------------------------------------------------------------------------------------------------------------------------------------------------------------------------------------------------------------------------------------------------------------------------------------------------------------------------------------------------------------------------------------------------------------------------------------------------------------------------------------------------------------------------------------------------------------------------------------------------------------------------------------------------------------------------------------------------------------------------------------------------------------------------------------------------------------------------------------------------------------------------------------------------------------------------------------------------------------------------------------------------------------------------------------------------------------------------------------------------------------------------------------------------------------------------------------------------------------------------------------------------------------------------------------------------------------------------------------------------------------------------------------------------------------------------------------------------------------------------------------------------------------------------------------------------------------------------------------------------------------------------------------------------------------------------------------------------------------------------------------------------------------------------------------------------------------------------------------------------------------------------------------------------------------------------------------------------------------------------------------------------------------------------------------------------------------------------------------------------------------------------------------------------------------------------------------------------------|
|                       |                  |                         | <p>CTGGGCGAGCTGATCAGCGAGTTCGAGGTCTTGCTGCGCCGCTGCTGCGCGAAGACGTCAAGC<br/> TGATACCGACTATGGCCGCGACCTGCCGACGGTGCAGCGCCGACAAGAGCCAGCTCGAGACGGC<br/> GGTCATGAACCTGGCCGTCAACGCCC GCGACGCCGTGCGCGCGGCCAAGGGCGGCGGCGTCTGT<br/> GCGCATCCGACCGCGCGCCTGACCCGCGACGAGGCGATCCAGCTGGGTTTCCCGGCCGCGAC<br/> GGCGACACGGCCTTCATTGAGGTCAGTGACGATGGTCCGGGATTCCGCCGACGTCATGGGCAA<br/> GATCTTCGACCCGTTCTTACCACCAAGCCGGTGGGCGAGGGTACGGGCCTAGGCCTAGCCACGG<br/> TCTATGGCATCGTTAAGCAGAGCGACGGCTGGATTACGTCCACAGCCGTCCGAACGAAGGCGCG<br/> GCCTTCCGCATCTTCTGCCGGTCTATGAAGCGCCCGCCGGCGCGGTGCGCGTCCAGGCCGTGCG<br/> CGAGCCCGCAAGCCGCGCGCCGCTCGCGACCTGTCCGGGCGCCGCGCCGATCCTGTTCTGTCGAG<br/> GACGAGGACGCCGTGCGCAGCGTCCGCCCGCCGCTGCTGCGCGCCCGTGGCTACGAGGTGCTTG<br/> AGGCGGCCGACGGCGAAGAGGCCCTGATCATCGCCGAGGAAAACGCCGGCACGATCGACCTTT<br/> GATCAGCGACGTGATCATGCCCGCATCGACGGCCCGACCTTGCTGAAGAAGGCGCGTGGCTATC<br/> TGGGGACCGCGCCGGTGTATGTTTCATCTCCGGTATGCCGAGGCCGAGTTCAGCGACCTTTGGAA<br/> GGCGAGACGGGCGTGACCTTCTCCCAAGCCGATCGACATCAAGACCCTGGCCGAGCGCGTCA<br/> AGCAGCAGCTGCAGGCGGCGTAGGcgggccgcat</p>                                                                                                                                                                                                                                                                                                                                                                                                                                                                                                                                                                                                                                                                                                                                                                                                                                                                                                                                                                                                                                                                                                                                                                                                                                                                      |
| <p><b>pGB1947</b></p> | <p>pCDF-duet</p> | <p>pCDF-CckA<br/>K-</p> | <p>gagatataccATGGCCGACTTGCAGTCCAGGACAAGGTTTCGACCGGCGCCCGCGTGGCGGTTT<br/> GATCCATGGCTGGTCCGCGCGGCGGTGTTTTTCGTGGCTGCGCGGCCCTCTCGCGGCGCGCCG<br/> CGCTCAAGGCCGGACCGACACCTGGCCGGCCTGCTGCTGCTTCTGGGCGTCCGCGGCGTGGC<br/> TGTGTTGGGCTTGTCCGATTCCGCGCTCAGCGCTTCCGGCGGCGACGCCGACAGGCTGAG<br/> GGTTCATCGAGGCGTGGCCGAGCCGGCCGCTGGCCGCCGACGGTCCGCTCTGGCCG<br/> CCAACGGGCCCTGGCGGAAGTCATGGGCGAACAGCGCCGCTGCCAAGGGCGTGGCGGGCT<br/> CCAGCCTGTTGCGGCCCTGGTCCAGGCGCCAGGGGAGATGGCCGAGGGCATGCTGAGCGC<br/> TGGAGGAACCGACTATACGCCAAGGTCTCGGCCTTGGGGCGGACGGCTGATGATCCGGCTTG<br/> CGCCATCGTTGTCGCTGAGCCGTTGTGGAAGACGCGTCCCGGCCCGGCGCGGAGCGCGC<br/> CGCCCCGCCACCCAGCTCGCTGGACGCCTTCCGGGAGCCTCGCCGTTGGCGCGGCCCTGCTGG<br/> AAGCCTGGAGCCGTTACCTCGCGGTGCTGGAGACCAATCCGGCGCTGACCACGATGACCGG<br/> CGCCAAGGCCGGTGTGCTGTTCCGGGATCTGATCGACGCCCTCGCGCGCCGAGGCCGAGACG<br/> CGCTGAACGAAGGCCGCGCCGGTCCCTACGAGGTGCGGTTGGCGCGGATCCGTCGCGCATCG<br/> CTCACCTTACCTCTATCGCGCCGAAGGCCGCTGGTGGCCTACATGATCGACGTGTCGAGCAGA<br/> AGCAGATCGAGCTGCAGCTGTCCAGGCCAGAAAGATGCAGGCCATCGGCCAGCTGGCCGGCGG<br/> CGTCCGCGCAGACTTCAACAACCTTTGACCGCCATCCAGCTGCGTCTGGACGAGTTGCTGCATCG<br/> CCATCCCGTCCGGTATCCGTCGTACGAGGGTCTCAACGAGATCCGTGACGCGGCGTCCGCGCCG<br/> CCGACCTCGTCCGCAAGCTCTTGGCTTCTCGCGCAAGCAGACCGTGCAGCGCGAGGTGCTGGAT<br/> CTGGGCGAGCTGATCAGCGAGTTCGAGGTCTTGCTGCGCCGCTGCTGCGCGAAGACGTCAAGC<br/> TGATACCGACTATGGCCGCGACCTGCCGACGGTGCAGCGCCGACAAGAGCCAGCTCGAGACGGC<br/> GGTCATGAACCTGGCCGTCAACGCCC GCGACGCCGTGCGCGCGGCCAAGGGCGGCGGCGTCTGT<br/> GCGCATCCGACCGCGCGCCTGACCCGCGACGAGGCGATCCAGCTGGGTTTCCCGGCCGCGAC<br/> GGCGACACGGCCTTCATTGAGGTCAGTGACGATGGTCCGGGATTCCGCCGACGTCATGGGCAA<br/> GATCTTCGACCCGTTCTTACCACCAAGCCGGTGGGCGAGGGTACGGGCCTAGGCCTAGCCACGG<br/> TCTATGGCATCGTTAAGCAGAGCGACGGCTGGATTACGTCCACAGCCGTCCGAACGAAGGCGCG<br/> GCCTTCCGCATCTTCTGCCGGTCTATGAAGCGCCCGCCGGCGCGGTGCGCGTCCAGGCCGTGCG<br/> CGAGCCCGCAAGCCGCGCGCCGCTCGCGACCTGTCCGGGCGCCGCGCCGATCCTGTTCTGTCGAG<br/> GACGAGGACGCCGTGCGCAGCGTCCGCCCGCCGCTGCTGCGCGCCCGTGGCTACGAGGTGCTTG<br/> AGGCGGCCGACGGCGAAGAGGCCCTGATCATCGCCGAGGAAAACGCCGGCACGATCGACCTTT<br/> GATCAGCGACGTGATCATGCCCGCATCGACGGCCCGACCTTGCTGAAGAAGGCGCGTGGCTATC<br/> TGGGGACCGCGCCGGTGTATGTTTCATCTCCGGTATGCCGAGGCCGAGTTCAGCGACCTTTGGAA<br/> GGCGAGACGGGCGTGACCTTCTCCCAAGCCGATCGACATCAAGACCCTGGCCGAGCGCGTCA<br/> AGCAGCAGCTGCAGGCGGCGTAGGcgggccgcat</p> |

|         |            |                            |                                                                                                                                                                                                                                                                                                                                                                                                                                                                                                                                                                                                                                                                                                                                                                                                                                                                                                                                                                                                                                                                                                                                                                                                                                                                                                                                                                                                                                                                                                                                                                                                                                                                                                                                                                                                                                                                                                                                                                                                                                                                                                                                                                                                                                                                                                                                                                                                                                                                                                                                                                                                                                                                                                                                                                                                                                                                                                                                                                                                                                                                                                                                                                                                                                                                                                                                                                                                                                                                                                                                                                                                                              |
|---------|------------|----------------------------|------------------------------------------------------------------------------------------------------------------------------------------------------------------------------------------------------------------------------------------------------------------------------------------------------------------------------------------------------------------------------------------------------------------------------------------------------------------------------------------------------------------------------------------------------------------------------------------------------------------------------------------------------------------------------------------------------------------------------------------------------------------------------------------------------------------------------------------------------------------------------------------------------------------------------------------------------------------------------------------------------------------------------------------------------------------------------------------------------------------------------------------------------------------------------------------------------------------------------------------------------------------------------------------------------------------------------------------------------------------------------------------------------------------------------------------------------------------------------------------------------------------------------------------------------------------------------------------------------------------------------------------------------------------------------------------------------------------------------------------------------------------------------------------------------------------------------------------------------------------------------------------------------------------------------------------------------------------------------------------------------------------------------------------------------------------------------------------------------------------------------------------------------------------------------------------------------------------------------------------------------------------------------------------------------------------------------------------------------------------------------------------------------------------------------------------------------------------------------------------------------------------------------------------------------------------------------------------------------------------------------------------------------------------------------------------------------------------------------------------------------------------------------------------------------------------------------------------------------------------------------------------------------------------------------------------------------------------------------------------------------------------------------------------------------------------------------------------------------------------------------------------------------------------------------------------------------------------------------------------------------------------------------------------------------------------------------------------------------------------------------------------------------------------------------------------------------------------------------------------------------------------------------------------------------------------------------------------------------------------------------|
| pGB1948 | pACYC-duet | pACYC-CpdR GFP-ChpT-CckAWT | <p>gagatataaccGTGGCCCGCATCTCTCGCCGAAGACGATGATTCCCTGCGCGGCTTCTGGCCCGCGCTGGAACGCGCCGGCTTCAAGTCCAGGCCTGCGCCGACGGCGAAGAGGCCGTCCAGCACCTGGACCATCCCTGGGACCTGCTGCTGACCGACATCGTCATGCCCGGCATGGACGGCATCGAGGTGGCCCGCCAGGCCCGCCCGCGACCCGTCCCTGCGCATCATGTTTCATCACCGGCTTCGCCCGCGTGGCCCTCTCGGCCAGGACCGCGCGCCCGCGCCGCAAGGTGCTGTCCAAGCCCGTGCACCTGCGCGACCTCGTCGCGAGGTGCAAAAAGATGATGGCGGCCCTCGAGAGCGGCGGCGGCGGAGTAAAGGTGAAGAACTGTTACCCGGTGTGTTCCGATCCTGTTGAACTGGATGGTGTAAACGGCCACAAATTCTCTGTTCTGTTGAAAGGTGAAGGTGATGCAACCAACGGTAAACTGACCCTGAAATTCATCTGCACTACCGGTAAACTGCCGGTTCATGGCCGACTCTGGTACTACCCTGACCTATGGTGTTCAGTGTTCCTCGTTACCCGGATCACATGAAGCAGCATGATTTCTCAAATCTGCAATGCCGGAAGGTTATGTACAGGAGCGCACCATTTCTTTCAAAGACGATGGCACCTACAAAACCCGTGCAGAGGTTAAATTTGAAGGTGATACTCTGGTGAACCGTATTGAACTGAAAGGCATTGATTTCAAAGAGGACGGCAACATCTGGGCCACAACTGGAATATAACTCAACTCCATAACGTTTACATCACCGCAGACAAACA GAAGAACGGTATCAAAGCTAACTTCAAATTCGCCATAACGTTGAAGACGGTAGCGTACAGCTGGCGGACACTACCAGCAGAACTCCGATCGGTGATGGTCCGGTTCTGCTGCCGATAACCACTACCTGTCCACCCAGTCTAAACTGTCAAAGACCCGAACGAAAAGCGCGACCACATGGTGTCTGTGGAGTTCGTTACTGCAGCAGGTATCACGCACGGCATGGATGAACTCTACAAATGAgcgccgcat.....agatatacatGTGACCGAGACCGTCACCGAGACCACCGCCCCCGCTCCCCGAAGCCGACGTCCAGGGTCCCGATTTCCCGCCATGCTGGCCGCGCCTGTGTACGACTTCATCAGTCCCGCCAGCGCCATC GTCTCGGGCCTGGATCTGCTGGAAGACCCCTCGGCCAGGACATGCGCGACGACGCCATGAACCTGATCGCCTCCTCGGCCGCAAGCTGGCGGACCTCTTGCACTTCACCCGAGTGGCCTTCGGCGCCTCGGCCTCGGCCGAGAACTCGACTCGCGCAACTGAAAAGCTGGCCAGGGCGTCTTTGCCCATGTCCGCCCGACCCTGGACTGGCAGATCGAGCCGAGGCGATGAACAAGCCCTCGTCGCGCGCGGTGCTGAACATCGCCAGATCGCCGACGCGCCTGCCGCGCGCGCGCTGGCCACCCTCAAGGGCGTGGCCGCGGACGGGCGCTTCTCGATCATGCGCGACCCAAGGGCCCGCGCGCGCCTGCGTCCGGAGGTGCTGGCGGGCTAAAGGGCGAGCCGCTGGCCGAGGGCCTGGGCGGTCCGTGGGTGCAGGCGCCTATCTGAACGCCCTGGTGCAGCGCGCCGGCGGCGCAGATCGCCGTCGAGATCGGCGAGGACCGCGCCTCGATCGCCGCTGGGTCCCGCGTAAActcgagctg.....tcagcgctagttagcgactcctgcattaggaaattaatacactcactataggggaattgtgagcggataacaattcccctgtagaataattttgttaactttaaaggagatataaccATGGCCGACTTGACGCTCCAGGACAAGTTTTGACCGGCGCCCCGCGTCCGGCGGTTTATCCATGGCTGGTCCGGCGGGCGGTGTTTTCTGTGGCTGCGGCGGCCCTCTCGCGGGCCGGCGCTCAAGGCCGACCGACCCCTGGCCGGCCTGCTGCTGCTTCTGGGCGTCCGGGGCTGGCTGTGTTGGGCCTGTGCGCATTGCGGGCTCAGCGCTTTCGGGCGGCGACGCCGACAGGCTGAGGGGTTTCATCGAGGCGTGGCCGAGCCGGCCCTGGCCCGCCGACGGTCCGCTCTGGCCCAACGGGCCCTGGCGGGAAGTTCATGGGCGAACAGCGCCGCTGCCAAGGGCGTGGCGGCTCCAGCCTGTTGCGGCCCTGGTCCAGGCGCGCCAGGGGAGATGGCCGAGGGCATGCTGAGCGCTGGAGGAACCGACTATACCGCAAGGTCTCGCGCCTTGGGGCGGACGGCTGATGATCCGGCTTGCGCCATCGTTGTGCTGAGCCGTTGTGGAAGACGCGTCCCGGCCCGGTGCGCCGAGCGCGCCCGCCACCCAGCTCGCTGGACGCCTTCGCCGAGCCTCGCCGTTGGCGCGGCCCTGCTGGAAGCCTGGAGCCGTTACCTCGCGGGTGTGGAGACCAATCCGGCGCTGACCACGATGACCGGCGCAAGGCCGGTGTGCTGTTCCGGGATCTGATCGACGCCCTCGCGCGCCGAGGCCGAGACGCGCCTGAACGAAGGCCGCGCCGTTCCCTACGAGGTGCGGTTGGCGCGGATCCGTCCGCGCATCGCTCACCTTTACCTCTATCGCGCCGAAGGCCGCTGGTGGCCTACATGATCGACGTGTCCGAGCAGAAGCAGATCGAGCTGCAGCTGCCAGGCCAGAAGATGCAGGCCATCGCCAGCTGGCCGGCGGCTCGCGCACGACTTCAACAACCTTTGACCGCCATCCAGCTGCGTCTGGACGAGTTGCTGCATCGCCATCCCGTCCGGTATCCGTCGTACGAGGGTCTCAACGAGATCCGTGACAGGGCGTGC GCGCCCGGACCTCGTGCGAAGCTCTTGCTTTCTCGCGCAAGCAGACCGTGCAGCGCGAGGTGCTGGATCTGGGCGAGCTGATCAGCGAGTTCGAGGTCTTGCTGCGCCGCTGCTGCGCGAAGACGTCAAGCTGATCACCGACTATGGCCGCGACCTGCCGAGGTGCGCGCCGACAAGAGCCAGCTCGAGACGGCGGTTCATGAACCTGGCCGTCAACGCCGCGACGCCGTGCGCGCGGCCAAGGGCGGCGCGTCTGCGCATCCGACCCGCGCCTGACCCGCGACGAGGCGATCCAGCTGGGTTTCCCGGCCCGACGGCGACACGGCCTTATTGAGGTGAGTACGATGGTCCGGGATTCCGCCGACGTCATGGGCAAGATCTTCGACCCGTTCTTACCACCAAGCCGGTGGGCGAGGGTACGGGCTAGGCCTAGCCGTAAGCGGTCTATGGCATCGTTAAGCAGAGCGACGGCTGGATTACGTCCACAGCCGTCCGAACGAGGCGCGCCTTCCGCATCTTCTGCCGGTCTATGAAGCGCCCGCCGGCGGGTCCGGTCCAGG</p> |
|---------|------------|----------------------------|------------------------------------------------------------------------------------------------------------------------------------------------------------------------------------------------------------------------------------------------------------------------------------------------------------------------------------------------------------------------------------------------------------------------------------------------------------------------------------------------------------------------------------------------------------------------------------------------------------------------------------------------------------------------------------------------------------------------------------------------------------------------------------------------------------------------------------------------------------------------------------------------------------------------------------------------------------------------------------------------------------------------------------------------------------------------------------------------------------------------------------------------------------------------------------------------------------------------------------------------------------------------------------------------------------------------------------------------------------------------------------------------------------------------------------------------------------------------------------------------------------------------------------------------------------------------------------------------------------------------------------------------------------------------------------------------------------------------------------------------------------------------------------------------------------------------------------------------------------------------------------------------------------------------------------------------------------------------------------------------------------------------------------------------------------------------------------------------------------------------------------------------------------------------------------------------------------------------------------------------------------------------------------------------------------------------------------------------------------------------------------------------------------------------------------------------------------------------------------------------------------------------------------------------------------------------------------------------------------------------------------------------------------------------------------------------------------------------------------------------------------------------------------------------------------------------------------------------------------------------------------------------------------------------------------------------------------------------------------------------------------------------------------------------------------------------------------------------------------------------------------------------------------------------------------------------------------------------------------------------------------------------------------------------------------------------------------------------------------------------------------------------------------------------------------------------------------------------------------------------------------------------------------------------------------------------------------------------------------------------------|

|                       |                   |                                   |                                                                                                                                                                                                                                                                                                                                                                                                                                                                                                                                                                                                                                                                                                                                                                                                                                                                                                                                                                                                                                                                                                                                                                                                                                                                                                                                                                                                                                                                                                                                                                                                                                                                                                                                                                                                                                                                                                                                                                                                                                                                                                                                                                                                                                                                                                                                                                                                                                                                                                                                                                                                                                                                                                                                                                                                                                                                                                                            |
|-----------------------|-------------------|-----------------------------------|----------------------------------------------------------------------------------------------------------------------------------------------------------------------------------------------------------------------------------------------------------------------------------------------------------------------------------------------------------------------------------------------------------------------------------------------------------------------------------------------------------------------------------------------------------------------------------------------------------------------------------------------------------------------------------------------------------------------------------------------------------------------------------------------------------------------------------------------------------------------------------------------------------------------------------------------------------------------------------------------------------------------------------------------------------------------------------------------------------------------------------------------------------------------------------------------------------------------------------------------------------------------------------------------------------------------------------------------------------------------------------------------------------------------------------------------------------------------------------------------------------------------------------------------------------------------------------------------------------------------------------------------------------------------------------------------------------------------------------------------------------------------------------------------------------------------------------------------------------------------------------------------------------------------------------------------------------------------------------------------------------------------------------------------------------------------------------------------------------------------------------------------------------------------------------------------------------------------------------------------------------------------------------------------------------------------------------------------------------------------------------------------------------------------------------------------------------------------------------------------------------------------------------------------------------------------------------------------------------------------------------------------------------------------------------------------------------------------------------------------------------------------------------------------------------------------------------------------------------------------------------------------------------------------------|
|                       |                   |                                   | <p>CCGTCGCCGAGCCCGCCAAGCCGCGCGCCGCTCGCGACCTGTCGGGCGCCGGCCGCATCCTGTTCTCGAGGACGAGGACGCCGTGCGCAGCGTCGCCGCCCGCTGCTGCGCGCCCGTGGCTACGAGGTGCTTGAGGCGGCCGACGGCGAAGAGGCCCTGATCATCGCCGAGGAAAACGCCGGCACGATCGACCTTGATCAGCGACGTGATCATGCCGGCATCGACGGCCGACCTTGCTGAAGAAGGCGCGTGGCTATCTGGGGACCGCGCCGGTGTGTTTCATCTCCGGCTATGCCGAGGCCGAGTTACGCGACCTCTGGAAGGCGAGACGGGCGTGACCTTCTCCCAAGCCGATCGACATCAAGACCCTGGCCGAGCGCTCAAGCAGCAGCTGCAGGCGCGTAGcggagtgat</p>                                                                                                                                                                                                                                                                                                                                                                                                                                                                                                                                                                                                                                                                                                                                                                                                                                                                                                                                                                                                                                                                                                                                                                                                                                                                                                                                                                                                                                                                                                                                                                                                                                                                                                                                                                                                                                                                                                                                                                                                                                                                                                                                                                                                                                                                                                                                                                                                                                                                                      |
| <p><b>pGB1949</b></p> | <p>pACYC-duet</p> | <p>pACYC-CpdRGFP-ChpT-CckA H+</p> | <p>gagatataccGTGGCCCGCATCCTCTCGCCGAAGACGATGATTCCCTGCGCGGCTTCTGGCCCGCGCTGGAACGCGCCGGCTCGAAGTCCAGGCCTGCGCCGACGGCGAAGAGGCCGTCCAGCACCTGGACCATCCCTGGGACTGCTGCTGACCGACATCGTCATGCCGGCATGGACGGCATCGAGGTGGCCCGCCAGGCCGCGCCCGGACCCGTCCTGCGCATCATGTTTCATCACCGGCTTCGCCCGGTGGCCCTCTCGGCCAGGACCGCGCGCCCGCGGCCAAGGTGCTGTCAAAGCCCGTGCACCTGCGCGACCTCGTCGCCGAGTGCAAAAGATGATGGCGCCCTCGAGAGCGGGCGGGCGGCAGTAAAGGTGAAGAACTGTTACCGGTGTTGTTCCGATCCTGTTGAACTGGATGGTGTGTTAACGCCACAAATTCTGTTCTGTTGTAAGGTGAAGGTGATGCAACCAACGGTAAACTGACCCTGAAATTCATCTGCACTACCGGTAACTGCCGTTCCATGGCCGACTCTGGTACTACCCTGACCTATGGTGTTCAGTGTTCCTGTTACCGGATCACATGAAGCAGCATGATTTCTCAAATCTGCAATGCCGGAAGTTATGTACAGGAGCGCACCATTCTTTCAAAGACGATGGCACCTACAAAACCCGTGCAGAGGTTAAATTTGAAGGTGATACTCTGGTGAACCGTATTGAACTGAAAGGCATTGATTTCAAAGAGGACGGCAACATCCTGGGCCACAACTGGAATATAACTCAACTCCCATAACGTTTACATCACCGCAGACAAACA GAAGAACGGTATCAAAGCTAACTTCAAATTCGCCATAACGTTGAAGACGGTAGCGTACAGCTGGCGGACACTACCAGCAGAACAACCTCCGATCGGTGATGGTCCGGTTCGCTGCCGATAACCACTACCTGTCCACCCAGTCTAAACTGTCAAAGACCCGAACGAAAAGCGCGACCACATGGTGTCTGGAGTTCGTTACTGCAGCAGGTATCACGCACGGCATGGATGAACTCTACAATGAgcgccgcat.....agatatacatGTGACCGAGACCGTACCAGAGACCACCGCCCCCGCTCCCCGAAGCCGACGTCCAGGGTCCCGATTCGCCGCCATGCTGGCCGCGCCTGTGTACGACTTCATCAGTCCGGCCAGCGCCATC GTCTCGGGCCTGGATCTGCTGGAAGACCCCTCGGCCAGGACATGCGCGACGACGCCATGAACCTGATCGCCTCTCGGCCGCAAGCTGGCGGACCTTTGCAAGTTACCCGAGTGGCCTTCGGCGCCTCGGCCTCGGCCGAGAACTCGACTCGCGCGAACTGGAAGAGCTGGCCAGGGCGTCTTTGCCCA TGTCGCCCGACCCCTGGACTGGCAGATCGAGCCGAGGCGATGAACAAGCCCTCGTCGCGCGCGGTGCTGAACATCGCCAGATCGCCGCCAGCGCCCTGCCGGCCGGCGGCGTGGCCACCCTCAAGG GCCTGGCCCGACGGGCGCTTCTCGATCATCGCCGACGCCAAGGGCCCGCGCGCGCCTGCC TCCGGAGGTGCTGGCGGGCCTAAAGGGCGAGCCGCTGGCCGAGGGCCTGGGCGGTCCGTGGGTGCAGGGCGCCTATCTGAACGCCCTGGTGCAGCGCGCCGGCGGCCAGATCGCCGTCGAGATCGGC GAGGACCGCGCCTCGATCGCCGCTGGGTCCCGCGTAAActcagtgctg.....tcagcgctagtatgagac tctctgattagaaattaatacactcactataggggaattgtgagcggataacaattccccttagaataatttggtaactt aataaggagatataccATGGCCGACTTGACGCTCCAGGACAAGTTTTGACCGGCGCCCGGCTCGGC GGTTTGATCCATGCTGGTGGCGCGGGCGGTGTTTTCTGGCTGCGCGGCCCTCTCGCGGGCG CCGGCGCTCAAGGCCGACCGACACCCTGGCCGGCCTGCTGCTGCTTCTGGGCGTCCGGGGCG TGCTGTGTTGGCCTTGTGCCATTGCGGCTCAGCGCTTTCGGCGGCGACGCCGACAGGCT GAGGGTTCATCGAGGCGCTGGCCGAGCCGGCCCTGGCCGCCGCCGACGGTCCGCTCCTGG CCGCAACGGGCCCTGGCGCGAAGTCATGGGCGAACAGCGCCGCTGCCAAGGGCGTGGCGG GCTCCAGCCTGTTGCGGCCCTGGTCCAGGCGCGCCAGGGGACAGATGGCCGAGGGCATGCTGAG CGCTGGAGGAACCGACTATACGCCAAGGTCTCGCGCCTTGGGGCGGACGGCTGATGATCCGG CTGCGCCATCGTTGTCGCTGAGCCGTTGTGGAAGACGCGTCCCGGCCCGGTCGCCGAGC GCGCCGCCCGCCACCCAGCTCGCTGGACGCTTCCCGGAGCCTCGCGGTTCCGGCGCGGCCCT GCTGGAAGGCCTGGAGCCGTTACCTCGCGGGTGTGGAAGACCAATCCGGCGCTGACCACGATG ACCGGCGCAAGGCCGGTGTGCTGTTCCGGCATCTGATCGACGCCGCTCGCGCGCCGAGGCCG AGACGCGCCTGAACGAAGGCCGCGCCGGTCCCTACGAGGTGCGGTTGGCGCGCATCCGTCCG CATCGCTCACCTTTACCTTATCGCGCCGAAGGCCGCTGGTGGCTACATGATCGACGTGCCGA GCAGAAGCAGATCGAGCTGCAGCTGTCCAGGCCGAGAAGATGCAGGCCATCGGCCAGCTGGCC</p> |

|         |            |                             |                                                                                                                                                                                                                                                                                                                                                                                                                                                                                                                                                                                                                                                                                                                                                                                                                                                                                                                                                                                                                                                                                                                                                                                                                                                                                                                                                                                                                                                                                                                                                                                                                                                                                                                                                                                                                                                                                                                                                                                                                                                                                                                                                                                                                                                         |
|---------|------------|-----------------------------|---------------------------------------------------------------------------------------------------------------------------------------------------------------------------------------------------------------------------------------------------------------------------------------------------------------------------------------------------------------------------------------------------------------------------------------------------------------------------------------------------------------------------------------------------------------------------------------------------------------------------------------------------------------------------------------------------------------------------------------------------------------------------------------------------------------------------------------------------------------------------------------------------------------------------------------------------------------------------------------------------------------------------------------------------------------------------------------------------------------------------------------------------------------------------------------------------------------------------------------------------------------------------------------------------------------------------------------------------------------------------------------------------------------------------------------------------------------------------------------------------------------------------------------------------------------------------------------------------------------------------------------------------------------------------------------------------------------------------------------------------------------------------------------------------------------------------------------------------------------------------------------------------------------------------------------------------------------------------------------------------------------------------------------------------------------------------------------------------------------------------------------------------------------------------------------------------------------------------------------------------------|
|         |            |                             | <p>GCGGAAGTCGCGCAGACTTCAACAACCTCTTGACCGCCATCCAGCTGCGTCTGGACGAGTTGCTGCATCGCCATCCCCTCGGTGATCCGTCGTACGAGGGTCTCAACGAGATCCGTCAGACGGCGTGC GCGCCGCCGACCTCGTGCAGCAAGCTCTTGCTTTCTCGCGCAAGCAGACCGTGCAGCGCAGGT GCTGGATCTGGGCGAGCTGATCAGCGAGTTCGAGGTCTTGCTGCGCCGCTGCTGCGCGAAGAC GTCAAGCTGATCACCGACTATGGCCGCGACCTGCCGACGGTGCAGCGCCGACAAGAGCCAGCTCG AGACGGCGGTATGAACCTGGCCGTCAACGCCGCGACGCCGTGCGCGCGGCCAAGGGCGGCG GCGTCGTGCGCATCCGACCGCGCGCTGACCCGCGACGAGGCGATCCAGCTGGGTTTCCCGGCC GCCGACGGCGACACGGCCTTATTGAGGTCAAGTACGATGGTCCGGGCATTCCGCCGACGTCAT GGGCAAGATCTTCGACCCGTTCTTACCACCAAGCCGGTGGGCGAGGGTACGGGCTAGGCCTA GCCACGGTCTATGGCATCGTTAAGCAGAGCGACGGTGGATTACGTCCACAGCCGTCCGAACGA AGGCGCGCCTTCCGCATCTTCTGCGGTCTATGAAGCGCCCGCGCGGGTTCGCCGTCCAGG CCGTCGCCGAGCCCGCAAGCCGCGCGCCGCTCGCGACCTGTCCGGCGCCGGCCGCATCCTGTTC GTCGAGGACGAGGACGCCGTGCGCAGCGTCCGCCCGCCCTGCTGCGCGCCCGTGGTACGAGG TGCTTGAGGCGGCCGACGGCGAAGAGGCCCTGATCATCGCCGAGGAAAACGCCGGCACGATCGA CCTTTGATCAGCGACGTGATCATGCCCGGCATCGACGGCCGACCTTGTGAAGAAGGCGCGTG GCTATCTGGGGACCGCGCCGGTATGTTTCATCTCCGGCTATGCCGAGGCCGAGTTTCAGCGACCTT TGGAAGGCGAGACGGCGGTGACCTTCTCCCAAGCCGATCGACATCAAGACCCTGGCCGAGCG CGTCAAGCAGCAGCTGCAGGCGGCTAGcggagtgtat</p>                                                                                                                                                                                                                                                                                                                                                                                                                                                                                                                                                                                                                                                                                                                                                                                                                                                                                                                                                                                                                                                                             |
| pGB1950 | pACYC-duet | pACYC-CpdR GFP-ChpT-CckA K- | <p>gagatataccGTGGCCCGCATCCTCTCGCCGAAGACGATGATTCCCTGCGCGGCTTCTGGCCGCG CGCTGGAACGCGCCGGCTTCGAAGTCCAGGCCTGCGCCGACGCGGAAGAGGCCGTCCAGCACCT GGACCATCCCTGGGACCTGCTGCTGACCGACATCGTCATGCCCGCATGGACGGCATCGAGGTGG CCCGCCAGGCCGCGCCGCGACCCGTCCTGCGCATCATGTTTCATCACCGGCTTCGCCCGGTGG CCCTCTCGGCCAGGACCGCGCGCCGCGCGCCGCAAGGTGCTGTCCAAGCCCGTGCACCTGCG CGACCTCGTCGCGAGGTGCAAAAAGATGATGGCGGCCCTCGAGAGCGGCGGCGGCGGAGTAA AGGTGAAGAACTGTTACCCGGTGTGTTCCGATCCTGTTGAAGTGGATGGTATGTTAACGGCC ACAAATTCTGTTCGTGGTGAAGGTGAAGGTGATGCAACCAACGGTAAACTGACCCTGAAATTC ATCTGCACTACCGTAAACTGCCGTTCCATGGCCGACTCTGGTACTACCCTGACCTATGGTGTTC AGTGTTTTTCTCGTTACCCGGATCACATGAAGCAGCATGATTTCTTCAAATCTGCAATGCCGGAAGG TTATGTACAGGAGCGACCATTCTTTCAAAGACGATGGCACCTACAAAACCCGTGCAGAGGTTAA ATTTGAAGGTGATACTCTGGTGAACCGTATTGAACTGAAAGGCATTGATTTCAAAGAGGACGGCA ACATCCTGGGCCACAACTGGAATATAACTTCAACTCCATAACGTTTACATCACCGCAGACAAACA GAAGAACGGTATCAAAGCTAACTTCAAATTCGCCATAACGTTGAAGACGGTAGCGTACAGCTGG CGGACCACTACCAGCAGAACACTCCGATCGGTGATGGTCCGGTCTGCTGCCGATAACCACTACC TGTCCACCCAGTCTAACTGTCAAAGACCCGAACGAAAAGCGCGACCACATGGTCTGCTGGAG TTCGTTACTGCAGCAGGTATCACGCACGGCATGGATGAACTCTACAAATGAgcggccgcat.....agat atacatGTGACCGAGACCGTCACCGAGACCACCGCCCCCGCTCCCCGAAGCCGACGTCCAGGGT CCCGATTTCCGCCCATGCTGGCCGCGCGCCTGTGTACGACTTCATCAGTCCGGCCAGCGCCATC GTCTCGGGCCTGGATCTGCTGGAAGACCCTCGGCCAGGACATGCGCGACGACGCCATGAACCT GATCGCCTCCTCGCCCCGAAGCTGGCGGACCTCTTGCAAGTTCACCCGAGTGGCCTTCGGCGCCT CGGCCTCGGCCGAGAACTCGACTCGCGCGAACTGGAAAAGCTGGCCAGGGCGTCTTTGCCCA TGTCCGCCGACCCCTGGACTGGCAGATCGAGCCGAGGCGATGAACAAAGCCCTGTCGCGCGCG GTGCTGAACATCGCCAGATCGCCGACGCGCCCTGCCGGCCGCGGCGTGGCCACCGTCAAAG GCGTGGCCGCGACGGGCGCTTCTGATCATCGCCGACGCCAAGGGCCCGCGCGCGCCTGCG TCCGGAGGTGCTGGCGGCCCTAAAGGGCGAGCCGCTGGCCGAGGGCCTGGGCGGTCCGTGGGT GCAGGCGGCCTATCTGAACGCCCTGGTGCAGCGCGCCGGCGGCCAGATCGCCGTCGAGATCGGC GAGGACCGCGCCTCGATCGCCGCTGGGTCCCGCGTAActcagtgctg.....tcagcgctagtatgcgac tcctgcattaggaattaatacactcactataggggaattgtgagcggataacaattccctgtagaataattttgttaacttt aataaggagatataccATGGCCGACTTGACGCTCCAGGACAAGGTTTCGACCGGCGCCCCGCGTCCGGC GGTTCGATCCATGGCTGGTCCGGCGCGCGGTGTTTTCTGTTGCTGCGGCGGCCCTCTCGGCGGCG CCGGCGCTCAAGGCCGACCGACCCCTGGCCGGCCTGCTGCTGCTTCTGGGCGTCCGCGGCGG TGCTGTGTTGGCCTGTGCGCATTGCGGGCTCAGCGCTTCCGGCGGCGACGCCGACCGAGCT</p> |



|         |                |                                                        |                                                                                                                                                                                                                                                                                                                                                                                                                                                                                                                                                                                                                                                                                                                                                                                                                                                                                                                                                                                                                                                                                                                                                                                                                                                                                                                                                                                                                                                                                                                                                                                                                                                                                                                                                                                                                                                                                                                                                                                                                                            |
|---------|----------------|--------------------------------------------------------|--------------------------------------------------------------------------------------------------------------------------------------------------------------------------------------------------------------------------------------------------------------------------------------------------------------------------------------------------------------------------------------------------------------------------------------------------------------------------------------------------------------------------------------------------------------------------------------------------------------------------------------------------------------------------------------------------------------------------------------------------------------------------------------------------------------------------------------------------------------------------------------------------------------------------------------------------------------------------------------------------------------------------------------------------------------------------------------------------------------------------------------------------------------------------------------------------------------------------------------------------------------------------------------------------------------------------------------------------------------------------------------------------------------------------------------------------------------------------------------------------------------------------------------------------------------------------------------------------------------------------------------------------------------------------------------------------------------------------------------------------------------------------------------------------------------------------------------------------------------------------------------------------------------------------------------------------------------------------------------------------------------------------------------------|
|         |                |                                                        | <p>GAGGGGTTTCATCGAGGCGCTGGCCGAGCCGGCCGCCCTGGCCGCCGCCGACGGTTCGCGTCTCG<br/> CCGCAACGGGCCCTGGCGCGAAGTTCATGGGCGAACAGCGCCGCTGCCAAGGGCGTGCGG<br/> GCTCCAGCCTGTTTGGCGCCCTGGTCCAGGCGCGCCAGGGGACAGATGGCCGAGGGCATGCTGAG<br/> CGCTGGAGGAACCGACTATACCGCAAGGTCTCGCGCCTTGGGGCGGACGGCTGATGATCCGG<br/> CTTGGCGCCATCGTTGTCGCTGAGCCGGTGTGGAAGACCGCTCGCCGGCCCGGTTCGCCGAGC<br/> GCGCCGCCCGCCACCCAGCTCGCTGGACGCCTTCGCCGGAGCCTCGCCGTTGGCGCGGCCCT<br/> GCTGGAAGGCCTGGAGCCGTTACCTCGCGGGTGTGGAGACCAATCCGGCGCTGACCACGATG<br/> ACCGGCGCAAGGCCGGTGTGCTGTTCCGGCGATCTGATCGACGCCGCTCGCGCGCCGAGGCCG<br/> AGACGCGCCTGAACGAAGGCCGCGCCGGTCCCTACGAGGTGCGGTTGGCGCGCATCCGTCGCG<br/> CATCGCTCACCTTTACCTCTATCGCGCCGAAGGCCGCTGGTGGCTACATGATCGACGTGTCCGA<br/> GCAGAAGCAGATCGAGCTGCAGCTGTCCCAGGCCAGAAGATGCAGGCCATCGGCCAGCTGGCC<br/> GGCGCGTTCGCCGGGACTTCAACAACCTCTTGACCGCCATCCAGCTGCGTCTGGACGAGTTGCT<br/> GCATCGCCATCCCGTCCGGTATCCGTCGTACGAGGGTCTCAACGAGATCCGTCAGACGGGCGTGC<br/> GCGCCGCCGACCTCGTGCAGCAAGCTCTTGCTTTCTCGCGCAAGCAGACCGTGCAGCGCGAGGT<br/> GCTGGATCTGGGCGAGCTGATCAGCGAGTTCGAGTCTTGCTGCGCCGCTGCTGCGCGAAGAC<br/> GTCAAGCTGATCACCGACTATGGCCGCGACCTGCCGAGGTGCGCGCCGACAAGAGCCAGCTCG<br/> AGACGGCGGTTCATGAACCTGGCCGTCAACGCCGCGACGCCGTGCGCGCGGCCAAGGGCGGCG<br/> GCGTCTGCGCATCCGACCGCGCGCCTGACCCGCGACGAGGCGATCCAGCTGGGTTTCCCGGCC<br/> GCCGACGGCGACACGGCCTTATTGAGGTGAGTACGATGGTCCGGGATTCCGCCGACGTCAT<br/> GGGCAAGATCTTCGACCGTCTTACCACCAAGCCGGTGGGCGAGGGTACGGGCTAGGCCTA<br/> GCCACGGTCTATGCATCGTTAAGCAGAGCGACGGCTGGATTACGTCCACAGCCGTCGAACGA<br/> AGGCGCGCCTTCCGCATCTTCTGCGGTCTATGAAGCGCCCGCGCGGTCGCCGTCCAGG<br/> CCGTCGCCGAGCCCGCAAGCCGCGCGCCGCTCGCGACCTGTCGGGCGCCGCGCATCCTGTT<br/> GTCGAGGACGAGGACGCCGTGCGCAGCGTCCGCCCGCCTGCTGCGCGCCGTGGTACGAGG<br/> TGCTTGAGGCGGCCGACGGCGAAGAGGCCCTGATCATCGCCGAGGAAAACGCCGGCACGATCGA<br/> CCTTTGATCAGCGACGTGATCATGCCCGCATCGACGGCCGACCTTGTGAAGAAGGCGCGTG<br/> GCTATCTGGGGACCGCGCCGGTATGTTTCATCTCCGGCTATGCCGAGGCCGAGTTCAGCGACCTT<br/> TGGAAGGCGAGACGGGCGTGACCTTCTCCCAAGCCGATCGACATCAAGACCCTGGCCGAGCG<br/> CGTCAAGCAGCAGCTGCAGGCGCGTAGcggagtgtat</p> |
| pGB1951 | pACYC-<br>duet | pACYC-<br>CpdR <sub>D51A</sub><br>GFP-ChpT-<br>CckA H+ | <p>gagatataccATGGCCGCATCCTCCTCGCCGAAGACGATGATTCCTGCGCGGCTTCTGGCCGCG<br/> CGCTGGAACGCGCCGGTTCGAAGTCCAGGCCTGCGCCGACGGCGAAGAGGCCGTCAGCACCT<br/> GGACCATCCCTGGGACCTGCTGCTGACCGCCATGTCATGCCGGCATGGACGGCATCGAGGTGG<br/> CCCGCCAGGCCCGCCGCCGACCCGTCCTGCGCATATGTTTCATCACCGGCTTCGCCCGGTGG<br/> CCCTCTCGGCCAGGACCGCGCGCCCGCGCCGCAAGGTGCTGTCCAAGCCCGTGCACCTGCG<br/> CGACCTCGTCGCCGAGGTGCAAAAAGATGATGGCGCCCTCGAGAGCGGCGGCGGCGGAGTAA<br/> AGGTGAAGAACTGTTACCGGTGTTGTTCCGATCCTGTTGAAGTGGATGGTATGTTAACGGCC<br/> ACAAATTCTGTTCTGTTGTTGAAGGTGAAGGTGATGCAACCAACGGTAAACTGACCCTGAAATTC<br/> ATCTGCACTACCGTAAACTGCCGGTTCATGGCCGACTCTGGTACTACCTGACCTATGGTGTTC<br/> AGTGTCTTCTCGTTACCCGGATCACATGAAGCAGCATGATTTCTCAAATCTGCAATGCCGGAAGG<br/> TTATGTACAGGAGCGACCATTCTTTCAAAGACGATGGCACCTACAAAACCCGTCAGAGGTTAA<br/> ATTTGAAGGTGATACTCTGGTGAACCGTATTGAACTGAAAGGCATTGATTTCAAAGAGGACGGCA<br/> ACATCCTGGGCCACAACTGGAATATAACTTCAACTCCATAACGTTTACATCACCGCAGACAAACA<br/> GAAGAACGGTATCAAAGCTAACTTCAAATTCGCCATAACGTTGAAGACGGTAGCGTACAGCTGG<br/> CGGACCACTACCAGCAGAACTCCGATCGGTGATGGTCCGGTTCGCTGCCGATAACCACTACC<br/> TGTCACCCAGTCTAAACTGTCAAAGACCCGAACGAAAAGCGCGACCACATGGTCTGCTGGAG<br/> TTCGTTACTGCAGCAGGTATCACGCACGGCATGGATGAACTCTACAAATGAgcggccgcat.....agat<br/> atacatGTGACCGAGACCGTCACCGAGACCACCGCCCCCGCTCCCCGAAGCCGACGTCCAGGGT<br/> CCCGATTTCCCGCCATGCTGGCCGCGCGCCTGTGTCACGACTTCATCAGTCCGGCCAGCGCCATC<br/> GTCTCGGGCCTGGATCTGCTGGAAGACCCTCGGCCAGGACATGCGCGACGACGCCATGAACCT<br/> GATCGCCTCCTCGGCCGCAAGCTGGCGGACCTCTTGCAGTTACCCGAGTGGCCTTCGGCGCCT<br/> CGCCTCGGCCGAGAACTCGACTCGCGCGAACTGGAAAAGCTGGCCAGGGCGTCTTTGCCCA<br/> TGTCCGCCGACCCCTGGACTGGCAGATCGAGCCGAGGCGATGAACAAGCCCTCGTCGCGCGCG<br/> GTGCTGAACATCGCCAGATCGCCGCCAGCGCCCTGCCGGCCGGCGGCGTGGCCACCGTCAAGG<br/> GCGTGGCCCGACGGGCGCTTCTGATCATCGCCGACGCCAAGGGCCCGCGCGCGCCTGCG<br/> TCCGGAGGTGCTGGCGGGCTAAAGGGCGAGCCGCTGGCCGAGGGCCTGGGCGGTCCGTGGGT</p>                                                                                                                                                                   |

|         |                |                            |                                                                                                                                                                                                                                                                                                                                                                                                                                                                                                                                                                                                                                                                                                                                                                                                                                                                                                                                                                                                                                                                                                                                                                                                                                                                                                                                                                                                                                                                                                                                                                                                                                                                                                                                                                                                                                                                                                                                                                                                                                                                                                                                                                                                                                                                                                                                                                                                                                                                                                                                                                |
|---------|----------------|----------------------------|----------------------------------------------------------------------------------------------------------------------------------------------------------------------------------------------------------------------------------------------------------------------------------------------------------------------------------------------------------------------------------------------------------------------------------------------------------------------------------------------------------------------------------------------------------------------------------------------------------------------------------------------------------------------------------------------------------------------------------------------------------------------------------------------------------------------------------------------------------------------------------------------------------------------------------------------------------------------------------------------------------------------------------------------------------------------------------------------------------------------------------------------------------------------------------------------------------------------------------------------------------------------------------------------------------------------------------------------------------------------------------------------------------------------------------------------------------------------------------------------------------------------------------------------------------------------------------------------------------------------------------------------------------------------------------------------------------------------------------------------------------------------------------------------------------------------------------------------------------------------------------------------------------------------------------------------------------------------------------------------------------------------------------------------------------------------------------------------------------------------------------------------------------------------------------------------------------------------------------------------------------------------------------------------------------------------------------------------------------------------------------------------------------------------------------------------------------------------------------------------------------------------------------------------------------------|
|         |                |                            | <p>GCAGGCGGCCTATCTGAACGCCCTGGTGC GCGCGGCCGGCGGCCAGATCGCCGTCGAGATCGGC<br/> GAGGACCGCGCCTCGATCGCCGCTGGTCCCGGCGTAActcagagctg.....tcagcgctagttagcgac<br/> tcctgcattaggaattaatacactcactataggggaattgtgagcggataacaattccctgtagaataattttgttaacttt<br/> aataaggagataaccATGGCCGACTTGCAGCTCCAGGACAAGTTTCGACCGGCGCCCCGCGTCGGC<br/> GGTTTGATCCATGGCTGGTCGGCGCGCGGTGTTTTCTGTGGCTGCGGCGGCCCTCTCGGCGGCG<br/> CCGGCGCTCAAGGCCGACCGACCACCTGGCCGGCCTGCTGCTGCTTCTGGGCGTCGCGGGCG<br/> TGGCTGTGTTGGGCCTGTGCGCATTGCGGGCTCAGCGCTTTCGGCGGCGACGCCGACAGGCT<br/> GAGGGGTTTCATCGAGGCGCTGGCCGAGCCGGCCGCTGGCCGCGCCGACGGTCGCGTCTG<br/> CCGCAACGGGCCCTGGCGGGAAGTCATGGGCGAACAGCGCCGCTGCCAAGGGCGTGCGG<br/> GCTCCAGCCTGTTTGCGGCCCTGGTCCAGGCGCGCCAGGGGACAGATGGCCGAGGGCATGCTGAG<br/> CGCTGGAGGAACCGACTATACCGCAAGGTCTCGCGCTTTCGGGCGGACGGCTGATGATCCGG<br/> CTTGCGCCATCGTTGTCGCTGAGCCGTTGTGGAAGACGCGTCGCCGGCCCCGGTTCGCCGAGC<br/> GCGCCGCCCGCCACCCAGCTCGCTGGACGCCTTCGCCGAGCCTCGCCGTTGGCGCGGCCCT<br/> GCTGGAAGCCTGGAGCCGTTCACTCGCGGGTGTGGAGACCAATCCGGCGCTGACCACGATG<br/> ACCGCGCCAAGGCCGGTGTGCTGTTCCGGCGATCTGATCGACGCCGCTCGCGCGCCGAGGCCG<br/> AGACGCGCTGAACGAAGGCCGCGCCGTTCCCTACGAGGTGCGGTTGGCGCGGATCCGTCGCG<br/> CATCGCTCACTTTACCTCTATCGCGCCGAAGGCCGCTGGTGGCTACATGATCGACGTGTCCGA<br/> GCAGAAGCAGATCGAGCTGCAGCTGTCCCAGGCCAGAAGATGCAGGCCATCGGCCAGCTGGCC<br/> GGCGAAGTCGCGCAGACTTCAACAACCTTTGACCGCCATCCAGCTGCGTCTGGACGAGTTGCT<br/> GCATCGCCATCCGTCGGTATCCGTCGTACGAGGGTCTCAACGAGATCCGTCAGACGGGCGTGC<br/> GCGCCGCCGACCTCGTGCGAAGCTCTTGCTTTCTCGCGCAAGCAGACCGTGCAGCGCGAGGT<br/> GCTGGATCTGGGCGAGCTGATCAGCGAGTTCGAGGTTGCTGCGCCGCTGCTGCGCAAGAC<br/> GTCAAGCTGATCACCAGCTATGGCCGCGACCTGCCGAGGTGCGCGCCGACAAGAGCCAGCTCG<br/> AGACGGCGGTATGAACCTGGCCGTCACGCCGCGACGCCGTGCGCGCGGCCAAGGGCGGCG<br/> GCGTCTGCGCATCCGACCGCGCGCCTGACCCGCGACGAGGCGATCCAGCTGGGTTTCCCGGCC<br/> GCCGACGGCGACACGGCCTTATTGAGGTGAGTACGATGGTCCGGGATTCCGCCGACGTCAT<br/> GGGCAAGATCTTCGACCGTTCTTACCACCAAGCCGGTGGGCGAGGGTACGGGCTAGGCCTA<br/> GCCACGGTCTATGGCATCGTTAAGCAGAGCGACGGCTGGATTACGTCCACAGCCGTCCGAACGA<br/> AGGCGCGCCTTCCGCATCTTCTGCGGTCTATGAAGCGCCCGCCGGCGCGGTGCGCGTCCAGG<br/> CCGTCGCCGAGCCCGCAAGCCGCGCGCCGCTCGCGACCTGTCGGGCGCCGGCCGATCCTGTTT<br/> GTCGAGGACGAGGACGCCGTGCGCAGCTGCGCCCGCCTGCTGCGCGCCGTTGGTACGAGG<br/> TGCTTGAGGCGGCCGACGGCGAAGAGGCCCTGATCATCGCCGAGGAAAACGCCGGCACGATCGA<br/> CCTTTGATCAGCGACGTGATCATGCCGGCATCGACGGCCGACCTTGTGAAGAAGGCGCGTG<br/> GCTATCTGGGGACCGCGCCGGTATGTTTCTCCGGCTATGCCGAGGCCGAGTTTACGCGACCTCT<br/> TGGAAGGCGAGACGGGCGTGACCTTCTCCCAAGCCGATCGACATCAAGACCCTGGCCGAGCG<br/> CGTCAAGCAGCAGCTGCAGGCGCGTAGcggagtgat</p> |
| pGB1952 | pACYC-<br>duet | pACYC-<br>CpdRGFP-<br>ChpT | <p>gagatataaccGTGGCCGCATCCTCTCGCCGAAGACGATGATTCCCTGCGCGGCTTCTGGCCCGC<br/> CGTGGAACGCGCCGGCTCGAAGTCCAGGCCTGCGCCGACGGCGAAGAGGCCGTCCAGCACCT<br/> GGACCATCCCTGGGACCTGCTGCTGACCGACATCGTCATGCCGGCATGGACGGCATCGAGGTGG<br/> CCCGCCAGGCCGCCGCCGCGACCCGTCCTGCGCATCATGTTTATCACCGGCTTCGCCCGGTGG<br/> CCCTCTCGGCCAGGACCGCGCGCCCGCGCGCAAGGTGCTGTCCAAGCCGTCACCTGCG<br/> CGACCTCGTCGCCGAGTTCGAAAAGATGATGGCGCCCTCGAGAGCGGCGGCGGCGGCGAGTAA<br/> AGGTGAAGAACTGTTACCGGTGTTGTTCCGATCCTGGTTGAACTGGATGGTATGTTAACGCC<br/> ACAAATTCTCTGTTGTTGTTGAAGGTGAAGGTGATGCAACCAACGGTAAACTGACCCTGAAATTC<br/> ATCTGCACTACCGTAAACTGCCGTTCCATGCGCCGACTCTGGTACTACCTGACCTATGGTGTTC<br/> AGTGTTTTTCTGTTACCGGATCACATGAAGCAGCATGATTTCTTCAAATCTGCAATGCCGGAAGG<br/> TTATGTACAGGAGCGCACCATTTCTTTCAAAGACGATGGCACCTACAAAACCCGTGACAGGTTAA<br/> ATTTGAAGGTGATACTCTGGTGAACCGTATTGAACTGAAAGGCATTGATTTCAAAGAGGACGGCA<br/> ACATCCTGGGCCAAAACCTGGAATATAACTTCAACTCCATAACGTTTACATCACCGCAGACAAA<br/> GAAGAACGGTATCAAAGCTAACTTCAAATTCGCCATAACGTTGAAGACGGTAGCGTACAGCTGG<br/> CGGACCACTACCAGCAGAACAACCTCCGATCGGTGATGGTCCGGTCTGCTGCCGATAACCACTACC<br/> TGTCCACCCAGTCTAAACTGTCAAAGACCCGAACGAAAAGCGCGACCATGGTGTGCTGCTGGAG<br/> TTCGTTACTGCAGCAGGTATCACGCACGGCATGGATGAACTTCAAATGAgcggccgcat.....agat<br/> atacatGTGACCGAGACCGTCACCGAGACCACCGCCCCCGTCCCCGAAGCCGACGTCCAGGGT<br/> CCCGATTTCCCGCCATGCTGGCCGCGCGCCTGTGTACGACTTTCATCAGTCCGGCCAGCGCCATC</p>                                                                                                                                                                                                                                                                                                                                                                                                                                                                                                                                                                                                                                                                                                                                                                                                                                                                                                                                                                                                                                                                                                                                                                             |

|         |                          |                                  |                                                                                                                                                                                                                                                                                                                                                                                                                                                                                                                                                                                                                                                                                                                                                                                                                                                                                                                                                                                                                                                                                                                                                                                                                                                                                                          |
|---------|--------------------------|----------------------------------|----------------------------------------------------------------------------------------------------------------------------------------------------------------------------------------------------------------------------------------------------------------------------------------------------------------------------------------------------------------------------------------------------------------------------------------------------------------------------------------------------------------------------------------------------------------------------------------------------------------------------------------------------------------------------------------------------------------------------------------------------------------------------------------------------------------------------------------------------------------------------------------------------------------------------------------------------------------------------------------------------------------------------------------------------------------------------------------------------------------------------------------------------------------------------------------------------------------------------------------------------------------------------------------------------------|
|         |                          |                                  | GTCTCGGGCCTGGATCTGCTGGAAGACCCCTCGGCCAGGACATGCGCGACGACGCCATGAACCT<br>GATCGCCTCCTCGGCCCGAAGCTGGCGGACCTCTTGCAAGTTACCCGAGTGGCCTTCGGCGCCT<br>CGGCCTCGGCCGAGAACTTCGACTCGCGGAACTGGAAAAGCTGGCCCAGGGCGTCTTTGCCCA<br>TGTCCGCCGACCCCTGGACTGGCAGATCGAGCCGAGGCGATGAACAAGCCCTCGTCGCGCGCG<br>GTGCTGAACATCGCCAGATCGCCGCCAGCGCCCTGCCGGCCGCGGCGTGGCCACCGTCAAGG<br>GCGTGGCCCGACGGGCGCTTCTCGATCATCGCCGACGCCAAGGGCCCGCGCGCGCCTGCG<br>TCCGGAGGTGCTGGCGGGCTAAAGGGCGAGCCGCTGGCCGAGGGCCTGGGCGGTCCGTGGGT<br>GCAGGCGGCTATCTGAACGCCCTGGTGCAGCGGCCGGCGGCCAGATCGCCGTCGAGATCGGC<br>GAGGACCGCGCTCGATCGCCGCTGGGTCCCGCGTAAactcagagtctg                                                                                                                                                                                                                                                                                                                                                                                                                                                                                                                                                                                                                                                                                                     |
| pGB1953 | pACYC-<br>duet           | pACYC-<br>CpdRGFP                | gagatataccGTGGCCCGCATCCTCTCGCCGAAGACGATGATTCCCTGCGCGGCTTCTGGCCCGCG<br>CGCTGGAACGCGCCGGCTCGAAGTCCAGGCCTGCGCCGACGGCGAAGAGGCCGTCCAGCACT<br>GGACCATCCCTGGGACTGCTGCTGACCGACATCGTCATGCCCGGCATGGACGGCATCGAGGTGG<br>CCCGCAGGCCGCGCCCGGACCCGTCCTGCGCATCATGTTTCATACCCGGCTTCGCCCGGTGG<br>CCCTCTCGGCCAGACCGCGCGCCCGCGGCCAAGGTGCTGTCAAAGCCCGTGCACCTGCG<br>CGACCTCGTCGCCGAGTGCAAAAGATGATGGCGCCCTCGAGAGCGGCGGCGGCGGCAGTAA<br>AGGTGAAGAACTGTTACCGGTGTTGTTCCGATCCTGGTGAAGTGGATGGTATGTTAACGCC<br>ACAAATCTCTGTTCTGTTGAAGGTGAAGGTGATGCAACCAACGGTAAACTGACCTGAAATTC<br>ATCTGCACTACCGTAAACTGCCGTTCCATGGCCGACTCTGGTACTACCCTGACCTATGGTGTTC<br>AGTGTTCCTCGTTACCCGATCACATGAAGCAGCATGATTTCTCAAATCTGCAATGCCGGAAGG<br>TTATGTACAGGAGCGACCATTTCCTTCAAAGACGATGGCACCTACAAAACCCGTGCAGAGTTAA<br>ATTTGAAGGTGATACTCTGGTGAACCGTATTGAACTGAAAGGCATTGATTTCAAAGAGGACGGCA<br>ACATCCTGGGCCACAACTGGAATATAACTCAACTCCATAACGTTTACATCACCGCAGACAAACA<br>GAAGAACGGTATCAAAGCTAACTTCAAATTCGCCATAACGTTGAAGACGGTAGCGTACAGCTGG<br>CGGACCACTACCAGCAGAACTCCGATCGGTGATGGTCCGGTTCGCTGCCGATAACCACTACC<br>TGTCCACCCAGTCTAAACTGTCAAAGACCCGAACGAAAAGCGGACCATGGTGTGCTGGAG<br>TTCGTTACTGCAGCAGGTATCACGCACGGCATGGATGAACTCTACAAATGagcgccgat                                                                                                                                   |
| pGB1954 | pBAD                     | pBAD-<br>mCherry ΔN<br>term PopZ | ggaattaaccATGGTGAGCAAGGGCGAGGAGGATAACATGGCCATCATCAAGGAGTTCATGCGCTTC<br>AAGGTGCACATGGAGGGCTCCGTGAACGGCCACGAGTTCGAGATCGAGGGCGAGGGCGAGGGC<br>CGCCCTACGAGGGCACCCAGACCGCAAGCTGAAGGTGACCAAGGGTGGCCCTGCTTCG<br>CCTGGGACATCCTGTCCCTCAGTTCATGTACGGCTCCAAGGCTACGTGAAGCACCCCGCAGACA<br>TCCCGACTACTTGAAGCTGCTTCCCGAGGGCTTCAAGTGGGAGCGCGTATGAACTTCGAG<br>GACGGCGGCGTGGTACCCTGACCCAGGACTCCTCCTGCAGGACGGCGAGTTCATCTACAAGG<br>TGAAGCTGCGCGCACCAACTTCCCTCCGACGGCCCGTAATGCAGAAGAAGACCATGGGCTG<br>GGAGGCCTCCTCCGAGCGGATGTACCCGAGGACGGCGCCCTGAAGGGCGAGATCAAGCAGAG<br>GCTGAAGCTGAAGGACGGCGCCACTACGACGCTGAGGTCAAGACCACCTACAAGGCCAAGAA<br>GCCCGTGCAGCTGCCGGCGCCTACAACGTCAACATCAAGTTGGACATCACCTCCACAACGAGG<br>ACTACACCATCGTGAACAGTACGAACGCGCCGAGGGCCGCACTCCACCGCGGCATGGACGA<br>GCTGTACAAGcctcagggccttaattaatgcatggtaccGATGACGCGCCGGCGGAGCCTGCGGCCGA<br>AGCGGGCCCCCGCCCGCCGGAACCCGAACCTGAACCGGTGTCGTTTCGACGACGAGGTTCTG<br>GAATTGACGGATCCGATCGCGCCGAGCCGAGCTGCCCGCTGGAGACTGTCGGCGACATCG<br>ACGCTATTCCCGCCGGAACCTGAGTCGGAACCGGCCTACACGCGCCCGCCGCGGCTCCGGTG<br>TTTGATCGGACGAAGTCGCCGAGCAGCTGGTCCGGCTTTCGGCCGCTTCGGCCGCGGCGAGCG<br>CCTTCGGCAGCCTGAGCTCGCCCTGCTGATGCCAAGGACGGTCCGACGCTGGAAGACGTCGT<br>ACGCGAGCTGCTGCGCCGCTGCTCAAGGAGTGGCTGGACCAGAACCTGCCGCGATCGTCGAG<br>ACCAAGGTTGAGGAAGAAGTGCAGCGTATCTCTCGGGGACGCGGCGCTAAactcagagatct |
| pGB1955 | pMCS5<br>(NdeI,<br>KpnI) | pMCS5-<br>pCpdR CpdR<br>YFP      | ccaattgcatGGTCGCCGTCGAACATCGCCGGTCCAGCTCCAGGGCTCACGGTTCAGATCCACATA<br>GGCGCGGGCGAAGCGGGCGCGCACACGCGGCCCCAGGGCGGGCGCGCCGCGATGATGC<br>GGTGCACAAACGCGTCTCGACGCGCGCAGGGTCTCGAGCGGCAGGCGGACCCGCGGCGACCA<br>TGTCTCCGGATAGAGGTGCGCCGAGTGCGGCGAGGCGAACCAAGGCGGTCCGGCGCGGCG<br>CCCCGGCCGGACCGCGCGCAGCACCTCGAACGCTGGCCCGCAAAGGTCTCCAGCGCGGGG<br>ACGAAAGCTCTTCGCTCGAAAGGGGCCCGCACGCGCTCATGCCGATCATGAAAGCGTCGCGGCG<br>CGGGGTCAAATCTCAATCGCCGCTGACGAAACATCCCAGCCGCGACGTTAGGTTTCATCCCCGAT<br>TTACGGACGGGGCGATAAGGTGGATCCTTATCGACGATCTTAATCGGACAGGTGACCCCATGGCC<br>CGCATCCTCCTCGCCGAAGACGATGATTCCTGCGCGGCTTCTGGCCCGCGGCTGGAACGCGC                                                                                                                                                                                                                                                                                                                                                                                                                                                                                                                                                                                                                                                                                       |

|         |                             |                                                |                                                                                                                                                                                                                                                                                                                                                                                                                                                                                                                                                                                                                                                                                                                                                                                                                                                                                                                                                                                                                                                                                                                                                                                                                                                                                                                                                                                                                                                                                                                                                                                                                                                                                                                                                                                                           |
|---------|-----------------------------|------------------------------------------------|-----------------------------------------------------------------------------------------------------------------------------------------------------------------------------------------------------------------------------------------------------------------------------------------------------------------------------------------------------------------------------------------------------------------------------------------------------------------------------------------------------------------------------------------------------------------------------------------------------------------------------------------------------------------------------------------------------------------------------------------------------------------------------------------------------------------------------------------------------------------------------------------------------------------------------------------------------------------------------------------------------------------------------------------------------------------------------------------------------------------------------------------------------------------------------------------------------------------------------------------------------------------------------------------------------------------------------------------------------------------------------------------------------------------------------------------------------------------------------------------------------------------------------------------------------------------------------------------------------------------------------------------------------------------------------------------------------------------------------------------------------------------------------------------------------------|
|         |                             |                                                | <p>CGGCTTCGAAGTCCAGGCCTGCGCCGACGGCGAAGAGGCCGTCCAGCACCTGGACCATCCCTGG<br/> GACCTGCTGCTGACCGACATCGTCATGCCCGGCATGGACGGCATCGAGGTGGCCCGCCAGGCCG<br/> CGCCCGGACCCGTCCTGCGCATCATGTTTCATACCCGGTTCGCGCCGTGGCCCTCTCGGCCA<br/> GGACCGCGCGCCCGCGCGCCAAGGTGCTGTCCAAGCCCGTGCACCTGCGCGACCTCGTCGCC<br/> GAGGTCGAAAAGATGATGGCGGCCCGGTACCGCGGGCCCGGGATCCACATGGTGAGCAAGGGC<br/> GAGGAGCTGTTACCCGGGGTGGTGCCATCCTGGTTCGAGCTGGACGGCGACGTAAACGGCCACA<br/> AGTTCAGCGTGTCCGGCGAGGGCGAGGGCGATGCCACCTACGGCAAGCTGACCCTGAAGTTCAT<br/> CTGCACCACCGGCAAGCTGCCCGTGCCTGGCCACCCTCGTGACCACCTTCGGCTACGGCCTGC<br/> AGTGCTTCGCCCGTACCCCGACCACATGAAGCAGCAGACTTCTTCAAGTCCGCCATGCCCGAAG<br/> GCTACGTCCAGGAGCGCACCATCTTCTTCAAGGACGACGGCAACTACAAGACCCGCGCCGAGGT<br/> GAAGTTCGAGGGCGACACCCTGGTGAACCGCATCGAGCTGAAGGGCATCGACTTCAAGGAGGAC<br/> GGCAACATCCTGGGGCACAAGCTGGAGTACAACACTACAACAGCCACAACGTCTATATCATGGCCGA<br/> CAAGCAGAAGAACGGCATCAAGGTGAACCTTCAAGATCCGCCACAACATCGAGGACGGCAGCGTG<br/> CAGCTCGCCGACCACTACCAGCAGAACACCCCATCGGCGACGGCCCCGTGCTGCTGCCCGACAA<br/> CCACTACCTGAGTACCAGTCCGCCCTGAGCAAAGACCCCAACGAGAAGCGCGATCACATGGTCC<br/> TGCTGGAGTTCGTGACCGCCGCGGGATCACTCTCGGCATGGACGAGCTGTACAAGTAGggtacctt<br/> aa</p>                                                                                                                                                                                                                                                                                                                                                                                                                                                                                                                                                                                                                                 |
| pGB1956 | pMCS5                       | pMCS5-<br>pCpdR<br>CpdR <sub>D51A</sub><br>YFP | <p>ccaattgcatGGTCGCCGTGCAACATCGCCGGGTCCAGTCCCAGGGCTCACGGTTCAGATCCACATA<br/> GGCGCGGGCGAAGCGGGCGCGCACACCGCGGCCCCAGGGCGGGCGCGCCGCGATGATGC<br/> GGTCGACAAACCGTCTCGGACGCGCGCAGGGTCTCGAGCGCAGGCGACCGCGCGACCA<br/> TGTCTCCGGATAGAGGTGCGCCGAGTGCGGCGAGGCGAACCAAGGCGTTCGGCGCGGGC<br/> CCCCGCGGGACCGCGCGCAGCACCTCGAACGCTGGCCCGCAAAGGTCTCCAGCGCGGGG<br/> ACGAAAAGCTTTCGCTCGAAAGGGGCGCCACGCGCTCATGCCGCATCATGAAGCGTCGCGGG<br/> CGGGTCAAATCTCAATCGCCGCTGACGAAACATCCCGACCGCGACGTTTAGGTTTCATCCCCGAT<br/> TTACGGACGGGGCGATAAGGTGGATCCTCTATCGACGATCTTAATCGGACACGTGACCCATGGCC<br/> CGCATCCTCTCGCCGAAGACGATGATTCCCTGCGCGGCTTCTGGCCCGCGCTGGAACGCGC<br/> CGGCTTCGAAGTCCAGGCCTGCGCCGACGGCGAAGAGGCCGTCCAGCACCTGGACCATCCCTGG<br/> GACCTGCTGCTGACCGCATCGTCATGCCCGGCATGGACGGCATCGAGGTGGCCCGCCAGGCCG<br/> CGCCCGGACCCGTCCTGCGCATCATGTTTCATACCCGGTTCGCGCCGTGGCCCTCTCGGCCA<br/> GGACCGCGCGCCCGCGCGCCAAGGTGCTGTCCAAGCCCGTGCACCTGCGCGACCTCGTCGCC<br/> GAGGTCGAAAAGATGATGGCGGCCCGGTACCGCGGGCCCGGGATCCACATGGTGAGCAAGGGC<br/> GAGGAGCTGTTACCCGGGGTGGTGCCATCCTGGTTCGAGCTGGACGGCGACGTAAACGGCCACA<br/> AGTTCAGCGTGTCCGGCGAGGGCGAGGGCGATGCCACCTACGGCAAGCTGACCCTGAAGTTCAT<br/> CTGCACCACCGGCAAGCTGCCCGTGCCTGGCCACCCTCGTGACCACCTTCGGCTACGGCCTGC<br/> AGTGCTTCGCCCGTACCCCGACCACATGAAGCAGCAGACTTCTTCAAGTCCGCCATGCCCGAAG<br/> GCTACGTCCAGGAGCGCACCATCTTCTTCAAGGACGACGGCAACTACAAGACCCGCGCCGAGGT<br/> GAAGTTCGAGGGCGACACCCTGGTGAACCGCATCGAGCTGAAGGGCATCGACTTCAAGGAGGAC<br/> GGCAACATCCTGGGGCACAAGCTGGAGTACAACACTACAACAGCCACAACGTCTATATCATGGCCGA<br/> CAAGCAGAAGAACGGCATCAAGGTGAACCTTCAAGATCCGCCACAACATCGAGGACGGCAGCGTG<br/> CAGCTCGCCGACCACTACCAGCAGAACACCCCATCGGCGACGGCCCCGTGCTGCTGCCCGACAA<br/> CCACTACCTGAGTACCAGTCCGCCCTGAGCAAAGACCCCAACGAGAAGCGCGATCACATGGTCC<br/> TGCTGGAGTTCGTGACCGCCGCGGGATCACTCTCGGCATGGACGAGCTGTACAAGTAGggtacctt<br/> aa</p> |
| pGB1959 | pBXMCS2<br>(NdeI,<br>EcoRI) | pBXMCS2-<br>CckA H+                            | <p>agacgacatATGGCCGACTTGACGCTCCAGGACAAGGTTTCGACCGCGCCCCGCTCGGCGGTTT<br/> GATCCATGGCTGGTCGGCGCGCGGTGTTTTTCGTGGCTGCGGCGCCCTCTCGGCGGCGCCGG<br/> CGCTCAAGGCCGACCGACCACCTGGCCGGCCTGCTGCTGCTTCTGGGCGTCGCGGGCGTGCC<br/> TGTGTTGGGCTTGTGCCATTGCGGCTCAGCGCTTTCGGCGGCGACCCGACCGAGGCTGAG<br/> GGTTCATCGAGGCGCTGGCCGAGCCGGCCCTGGCCGCCGACGGTCGCTCCTGGCCG<br/> CCAACGGGCCCTGGCGGAAGTCATGGGCGAACAGCGCCGCTGCCAAGGGCGTGCGGGCT<br/> CCAGCCTGTTTGGCGCCCTGGTCCAGGCGGCCAGGGGCGAGATGGCCGAGGGCATGCTGAGCGC<br/> TGGAGGAACCGACTATACCGCAAGTCTCGGCCTTGGGGCGGACGGCTGATGATCCGGCTTG<br/> CGCCATCGTTGTGCTGAGCCGTTGTGGAAGACGCGTCGCCGGCCCCGGTCCCGAGCGCGC<br/> CGCCCCGCCACCCAGCTCGCTGGACGCTTTCGCCGAGCCTCGCCGTTGGGCGCGGCCCTGCTGG<br/> AAGGCTGGAGCCGTTACCTCGCGGTGCTGGAGACCAATCCGGCGCTGACCACGATGACCGG<br/> CGCAAGGCCGGTGTGCTTTCGGCGATCTGATCGACGCGCCCTCGCGCGCCGAGGCCGAGACG</p>                                                                                                                                                                                                                                                                                                                                                                                                                                                                                                                                                                                                                                                                                                                                                                                                                                                                                                                                                                  |

|         |         |                     |                                                                                                                                                                                                                                                                                                                                                                                                                                                                                                                                                                                                                                                                                                                                                                                                                                                                                                                                                                                                                                                                                                                                                                                                                                                                                                                                                                                                                                                                                                                                                                                                                                                                                                                                                                                                                                                                                                                                                                                                                                                                                                                                                                                                                                                                                                               |
|---------|---------|---------------------|---------------------------------------------------------------------------------------------------------------------------------------------------------------------------------------------------------------------------------------------------------------------------------------------------------------------------------------------------------------------------------------------------------------------------------------------------------------------------------------------------------------------------------------------------------------------------------------------------------------------------------------------------------------------------------------------------------------------------------------------------------------------------------------------------------------------------------------------------------------------------------------------------------------------------------------------------------------------------------------------------------------------------------------------------------------------------------------------------------------------------------------------------------------------------------------------------------------------------------------------------------------------------------------------------------------------------------------------------------------------------------------------------------------------------------------------------------------------------------------------------------------------------------------------------------------------------------------------------------------------------------------------------------------------------------------------------------------------------------------------------------------------------------------------------------------------------------------------------------------------------------------------------------------------------------------------------------------------------------------------------------------------------------------------------------------------------------------------------------------------------------------------------------------------------------------------------------------------------------------------------------------------------------------------------------------|
|         |         |                     | <p>CGCCTGAACGAAGGCCGCGCCGGTCCCTACGAGGTGCGGTTGGCGCGGATCCGTGCGCATCG<br/> CTCACCTTTACCTCTATCGCGCCGAAGGCCGCTGGTGGCCTACATGATCGACGTGTCCGAGCAGA<br/> AGCAGATCGAGCTGCAGCTGTCCCAGGCCAGAAAGATGCAGGCCATCGGCCAGCTGGCCGGCGA<br/> AGTCGCGCACGACTTCAACAACCTCTTGACCGCCATCCAGCTGCGTCTGGACGAGTTGCTGCATCG<br/> CCATCCCCTCGGTGATCCGTCTGACGAGGGTCTCAACGAGATCCGTGACAGCGGGCGTGCAGCGCCG<br/> CCGACCTCGTGCAGCAAGCTCTTGGCTTTCTCGCGCAAGCAGACCGTGCAGCGCGAGGTGCTGGAT<br/> CTGGGCGAGCTGATCAGCGAGTTCGAGGTCTTGTGCGCCGCTGCTGCGCAAGACGTCAAGC<br/> TGATACCGACTATGGCCGCGACCTGCCGAGGTGCGCGCCGACAAGAGCCAGCTCGAGACGGC<br/> GGTCATGAACCTGGCCGTCAACGCCCGCGACGCCGTGCGCGCGGCCAAGGGCGGGCGGCTCGT<br/> GCGCATCCGCACCGCGCGCCTGACCCGCGACGAGGGCATCCAGCTGGGTTTCCCGGCCGCGAC<br/> GGCGACACGGCCTTCATTGAGGTCAAGTACGATGGTCCGGGATTCCGCCGACGTGATGGGCAA<br/> GATCTTCGACCCGTTCTTACCACCAAGCCGGTGGGCGAGGGTACGGGCTAGGCCTAGCCACGG<br/> TCTATGGCATCGTTAAGCAGAGCGACGGCTGGATTACGTCCACAGCCGTCCGAACGAAGGCCGCG<br/> GCCTTCCGATCTTCTGCCGGTCTATGAAGCGCCCGCGCGGGTCCGGTCCAGGCCGTGCG<br/> CGAGCCCGCAAGCCGCGCGCCGCTCGCGACCTGTGCGGCGCCGGCCGATCCTGTTCTGTCGAG<br/> GACGAGGACCGGTGCGCAGCGTCCCGCCCGCTGCTGCGCGCCCGTGGTACGAGGTGCTTG<br/> AGGCGGCCGACGGCGAAGAGGCCCTGATCATCGCCGAGGAAAACGCCGCGACGATCGACCTCTT<br/> GATCAGCGACGTGATCATGCCCGCATCGACGGCCCGACCTTGCTGAAGAAGGCGCGTGGCTATC<br/> TGGGGACCGCGCCGGTGTATGTTTCTCCGGTATGCCGAGGCCGAGTTCAGCGACCTCTTGAA<br/> GGCGAGACGGGCGTGACCTTCTCCCAAGCCGATCGACATCAAGACCCTGGCCGAGCGCGT<br/> AAGCAGCAGCTGCAAGCAGCATAGgaattctgc</p>                                                                                                                                                                                                                                                                                                                                                                                                                                                                                                                                                                                                                                                                                                                                                                                                                                |
| pGB1960 | pBXMCS2 | pBXMCS2-<br>CckA K- | <p>agacgaccatATGGCCGACTTGCAGCTCCAGGACAAGGTTTCGACCGCGCCCGCGTGGCGGTTT<br/> GATCCATGGCTGGTGGCGCGCGGGTGTGTTTTCTGGCTGCGCGGCCCTCTCGCGCGCGCCGG<br/> CGCTCAAGGCCGACCGACCCCTGGCCGGCCTGCTGCTGCTTCTGGGCGTGCAGGGCGTGGC<br/> TGTGTTGGCCTTGTGCGCATTGCGGCTCAGCGCTTCCGGCGCGACGCCGACAGGCTGAG<br/> GGGTTTCATCGAGGCGTGGCCGAGCCGGCCGCTGGCCGCGCCGACGGTGCAGTCTGGCCG<br/> CCAACGGGCCCTGGCGCAAGTCAAGGCGAAGAGCGCCGCTGCCAAGGGCGTGGCGGGCT<br/> CCAGCCTGTTTGGGCCCTGGTCCAGGCGCGCAGGGGAGATGGCCGAGGGCATGCTGAGCGC<br/> TGGAGGAACCGACTATACCGCAAGGTCTCGGCCTTGGGGCGGACGGCTGATGATCCGGCTTG<br/> CGCCATCGTTGTGCTGAGCCGGTGTGGAAGACGCGTCCCGGCCCGGTCGCCGAGCGCGC<br/> CGCCCCGCCACCCAGCTCGTGGACGCCTTCCGCGAGCCTCGCCGTTGGCGCGGCCCTGCTGG<br/> AAGGCTGGAGCCGTTACCTCGCGGGTGTGGAGACCAATCCGGCGCTGACCACGATGACCGG<br/> CGCCAAGGCCGGTGTGCTGTTCCGCGATGATCGACGCGCCTCGCGCGCCGAGGCCGAGACG<br/> CGCCTGAACGAAGGCCGCGCCGGTCCCTACGAGGTGCGGTTGGCGCGGATCCGTGCGCATCG<br/> CTCACCTTTACCTCTATCGCGCCGAAGGCCGCTGGTGGCCTACATGATCGACGTGTCCGAGCAGA<br/> AGCAGATCGAGCTGCAGCTGTCCCAGGCCAGAAAGATGCAGGCCATCGGCCAGCTGGCCGGCGG<br/> CGTGCAGGGCGGACTTCAACAACCTCTTGACCGCCATCCAGCTGCGTCTGGACGAGTTGCTGCATC<br/> GCCATCCCCTCGGTGATCCGTCTGACGAGGGTCTCAACGAGATCCGTGACAGCGGGCGTGCAGCGC<br/> GCCGACCTCGTGCAGCAAGCTTGGCTTTCTCGCGCAAGCAGACCGTGCAGCGCGAGGTGCTGG<br/> ATCTGGGCGAGCTGATCAGCGAGTTCGAGGTCTTGTGCGCCGCTGCTGCGCAAGACGTCAA<br/> GCTGATACCGACTATGGCCGCGACCTGCCGAGGTGCGCGCCGACAAGAGCCAGCTCGAGACG<br/> GCGGTGATGAACCTGGCCGTCAACGCCCGCGACGCCGTGCGCGCGGCCAAGGGCGGGCGGCTC<br/> GTGCGCATCCGCACCGCGCGCCTGACCCGCGACGAGGGCATCCAGCTGGGTTTCCCGGCCGCG<br/> ACGGCGACACGGCCTTCATTGAGGTCAAGTACGATGGTCCGGGATTCCGCCGACGTGATGGG<br/> AAGATCTTCGACCCGTTCTTACCACCAAGCCGGTGGGCGAGGGTACGGGCTAGGCCTAGCCAC<br/> GGTCTATGGCATCGTTAAGCAGAGCGACGGCTGGATTACGTCCACAGCCGTCCGAACGAAGGGC<br/> CGCCTTCCGCATCTTCTGCCGGTCTATGAAGCGCCCGCGGGTCCGGTCCAGGCCGTC<br/> GCCGAGCCCGCAAGCCGCGCGCCGCTCGCGACCTGTGCGGCGCCGGCCGATCCTGTTCTGTCG<br/> AGGACGAGGACGCCGTGCGCAGCGTCCCGCCCGCTGCTGCGCGCCCGTGGTACGAGGTGCT<br/> TGAGGCGGCCGACGGCGAAGAGGCCCTGATCATCGCCGAGGAAAACGCCGCGACGATCGACCTC<br/> TTGATCAGCGACGTGATCATGCCCGCATCGACGGCCGACCTTGCTGAAGAAGGCGCGTGGCTA<br/> TCTGGGGACCGCGCCGGTGTATGTTTCTCCGGTATGCCGAGGCCGAGTTCAGCGACCTCTTGG<br/> AAGGCGAGACGGGCGTGACCTTCTCCCAAGCCGATCGACATCAAGACCCTGGCCGAGCGCGT<br/> CAAGCAGCAGCTGCAAGCAGCATAGgaattctgc</p> |

|                |                           |                              |                                                                                                                                                                                                                                                                                                                                                                                                                                                                                                                                                                                                                                                                                                                                                                                                                                                                                                                                                                                                                                                                                                                                                                                                                                                                                                                                                                                                                                                                                                                                                                                                                                                                                                                                                                                                                                                                                                                                                                                                                                                                                                                                                                                                                                                                                                                                                                                                                                                          |
|----------------|---------------------------|------------------------------|----------------------------------------------------------------------------------------------------------------------------------------------------------------------------------------------------------------------------------------------------------------------------------------------------------------------------------------------------------------------------------------------------------------------------------------------------------------------------------------------------------------------------------------------------------------------------------------------------------------------------------------------------------------------------------------------------------------------------------------------------------------------------------------------------------------------------------------------------------------------------------------------------------------------------------------------------------------------------------------------------------------------------------------------------------------------------------------------------------------------------------------------------------------------------------------------------------------------------------------------------------------------------------------------------------------------------------------------------------------------------------------------------------------------------------------------------------------------------------------------------------------------------------------------------------------------------------------------------------------------------------------------------------------------------------------------------------------------------------------------------------------------------------------------------------------------------------------------------------------------------------------------------------------------------------------------------------------------------------------------------------------------------------------------------------------------------------------------------------------------------------------------------------------------------------------------------------------------------------------------------------------------------------------------------------------------------------------------------------------------------------------------------------------------------------------------------------|
| <b>pGB1961</b> | pXMCS5<br>(NdeI,<br>KpnI) | pXMCS5-<br>YFP-CtrA<br>RD+15 | <p>agacgaccatATGAGCAAGGGCGAGGAGCTGTTACCGGGGTGGTGCCCATCTGGTTCGAGCTGGA<br/> CGGCGACGTAAACGGCCACAAGTTTCAGCGTGTCCGGCGAGGGCGAGGGCGATGCCACCTACGGC<br/> AAGCTGACCCTGAAGTTCATCTGCACCACCGGCAAGCTGCCCGTGCCTGGCCACCCTCGTGAC<br/> CACCTTCGGCTACGGCCTGCAGTGCTTCGCCCCTACCCGACCACATGAAGCAGCAGACTTCTT<br/> CAAGTCCGCCATGCCGAAGGCTACGTCCAGGAGCGCACCATCTTCTCAAGGACGACGGCAACT<br/> ACAAGACCCGCGCCGAGGTGAAGTTCGAGGGCGACACCCTGGTGAACCGCATCGAGCTGAAGG<br/> GCATCGACTTCAAGGAGGACGGCAACATCTGGGGCACAAGCTGGAGTACAACACAACAGCCA<br/> CAACGTCTATATCATGGCCGACAAGCAGAAGAACGGCATCAAGGTGAACTTCAAGATCCGCCACA<br/> ACATCGAGGACGGCAGCGTGCAGCTCGCCGACCACTACCAGCAGAACACCCCATCGGCGACGG<br/> CCCCGTGCTGCTGCCGACAACCACTACCTGAGCTACCAGTCCGCCCTGAGCAAAGACCCCAACG<br/> AGAAGCGCGATCACATGGTCTGCTGGAGTTCGTGACCGCCGCGGGGATCACTCTCGGCATGGAC<br/> GAGCTGTACAAGggaagtagcggTGCgCGCTACTGTTGATCGAGGATGACAGCGCGACGGCGCAGA<br/> CCATCGAACTGATGCTGAAGTCTGAAGGCTTCAACGTCTATACGACGGATCTGGGTGAAGAAGGC<br/> GTCGATCTGGGCAAGATCTACGACTACGATCTTATCCTGCTCGACCTCAATCTCCGGACATGAGCG<br/> GCATCGATGTTCTGCGCACCTGCGGGTTCGGAAGATCAACACGCCCATCATGATCTGTCGGGCT<br/> CGTCGGAAATCGACACCAAGGTCAAGACCTTCGCCGGCGCGCCGACGACTACATGACCAAGCC<br/> GTTCCACAAGGACGAAATGATCGCCCGCATCCACGCGGTGGTCCGTGGCTATGTCTGCGCGACC<br/> CGAACGAGCAGGTTAACGCCGCTGAggtaccacgt</p>                                                                                                                                                                                                                                                                                                                                                                                                                                                                                                                                                                                                                                                                                                                                                                                                                                                                                                                                                                                                                                                                                                                                                                         |
| <b>pGB1962</b> | pXMCS5                    | pXMCS5-<br>YFP-TacA          | <p>agacgaccatATGAGCAAGGGCGAGGAGCTGTTACCGGGGTGGTGCCCATCTGGTTCGAGCTGGA<br/> CGGCGACGTAAACGGCCACAAGTTTCAGCGTGTCCGGCGAGGGCGAGGGCGATGCCACCTACGGC<br/> AAGCTGACCCTGAAGTTCATCTGCACCACCGGCAAGCTGCCCGTGCCTGGCCACCCTCGTGAC<br/> CACCTTCGGCTACGGCCTGCAGTGCTTCGCCCCTACCCGACCACATGAAGCAGCAGACTTCTT<br/> CAAGTCCGCCATGCCGAAGGCTACGTCCAGGAGCGCACCATCTTCTCAAGGACGACGGCAACT<br/> ACAAGACCCGCGCCGAGGTGAAGTTCGAGGGCGACACCCTGGTGAACCGCATCGAGCTGAAGG<br/> GCATCGACTTCAAGGAGGACGGCAACATCTGGGGCACAAGCTGGAGTACAACACAACAGCCA<br/> CAACGTCTATATCATGGCCGACAAGCAGAAGAACGGCATCAAGGTGAACTTCAAGATCCGCCACA<br/> ACATCGAGGACGGCAGCGTGCAGCTCGCCGACCACTACCAGCAGAACACCCCATCGGCGACGG<br/> CCCCGTGCTGCTGCCGACAACCACTACCTGAGCTACCAGTCCGCCCTGAGCAAAGACCCCAACG<br/> AGAAGCGCGATCACATGGTCTGCTGGAGTTCGTGACCGCCGCGGGGATCACTCTCGGCATGGAC<br/> GAGCTGTACAAGGGAAGTAGCGGTGCGACAAAACGGTCTTGTCTGTCGATGACGACCCGACAC<br/> AACGTGCGTTGATTCAAGCGGTGCTCGAGCGCGACGGGTTGCGGGTCTCGCACGCGGAAGGCGG<br/> CGACGCGGCGATCGCGACCTGACGTCCGGCGCGCCGCGGATGTCATCCTGCTGGATCTGTCAT<br/> GCCTGGCCTCAACGGTCAGGACGCCCTGAAGGAAATGCGCGCCCGCGGTTCAACCAGCCCGTG<br/> ATCGTGCTGACGGCCAGCGGTGGCGTGCACACCGTGGTCAAGGCCATGCAGGCCGGCGCCTGCG<br/> ACTTCTCATCAAGCCCGCCTCGCCGAGCGGATCACCGTGTGATCCGCAACGCCCTGTCGATGG<br/> GCGACCTCAAGGGCGAGGTGAGCGGGTGACCAAGCGCGGGGCGGAAGACCCTTCGCGG<br/> ACCTGATCGGCGCCTCGCCGTCATGACCATGGTCAAGCGCATGGGCGAGCGGGCCGCAAGAG<br/> CGGTATCCCGGTGCTGATACCGGCGAAAAGCGGCGTCCGCAAGGAGCTGATCGCCGCGCCGTC<br/> CACGGCTCTCCGACCGCGCCGGAAGCCGTTTGTGCGGGTCAACTGCGGCGGATCCCGAGAA<br/> CCTCGTCGAGTCGATCCTGTTGCGCCACGAGAAGGGCTCGTTACCGGCGCCACCAGACAAGCATC<br/> TGGGCAAGTTCAAGGAGGCCGACGGCGGACCCGTTCCTCGATGAGGTGCGCGAGCTGCCGCT<br/> CGACATGCAGGTCAAGCTGCTGCGGCCCTGCAGGAGGGCGAGATCGACCCGATCGGCTCCAAG<br/> CGCTCGATCAAGGTGATGTCGGATCGTGTGCGGACCAATCGCGATCTGCAGCAGGCCGTTTC<br/> GGGCGGCCGTTCCGCGAAGACCTGTTTATCGCCTGAACGTGTTCCGATCGAGCGCCGTCCTC<br/> TGCGGAGCGTTCGCGAGGACATCCCGCCCTCGTCGAGGCGTTCATCCGCCGTTCAACGTCGAA<br/> GAAGGCAAGCGCGTATCGGCGCCTCGCCGAGACGATGCAACTGCTGACCAGCTTCGACTGGC<br/> CCGGCAATGTGCGCAACTGAAAAACACCGTCTATCGCGCCATCGTGTGCGCGATGCGCCCTATC<br/> TGCAGCCGTTGACTTCCCGGCGATCTCGGGCTGGCCGCGCCGATCGAGGCCGTCGATCTCGC<br/> CCTCGCCGCCCTGCAGCCCTGTTGCAAGCCACGCATGCGGCGATGGCCGCCCGCGTGCAGAG<br/> GCGCCTGTGCGATCCTCGACGATCGCGGTACCTGCGGACCCTGGAGGAGATCGAGCGCGACCT<br/> CATCCAGCATGCGATCGACTTATGCCGCCACATGAGCGAGGTGCGCGGGGTTGGGCATCG<br/> GTCGCTGACCCCTATCGCAAGGTTGCGGAGCAGGGCATCGAAGTGCATGAAGGAAAGCGGG<br/> CTGAggtaccacgt</p> |

|         |        |                      |                                                                                                                                                                                                                                                                                                                                                                                                                                                                                                                                                                                                                                                                                                                                                                                                                                                                                                                                                                                                                                                                                                                                                                                                                                                                                                                                                                                                                                                                                                                                                                                                                                                                                                                                                                                                                                                                                                                                                                                                                                                                                                                                                                                                                                                                                                                                                                                                                                                                                                                                                                                                                                                                        |
|---------|--------|----------------------|------------------------------------------------------------------------------------------------------------------------------------------------------------------------------------------------------------------------------------------------------------------------------------------------------------------------------------------------------------------------------------------------------------------------------------------------------------------------------------------------------------------------------------------------------------------------------------------------------------------------------------------------------------------------------------------------------------------------------------------------------------------------------------------------------------------------------------------------------------------------------------------------------------------------------------------------------------------------------------------------------------------------------------------------------------------------------------------------------------------------------------------------------------------------------------------------------------------------------------------------------------------------------------------------------------------------------------------------------------------------------------------------------------------------------------------------------------------------------------------------------------------------------------------------------------------------------------------------------------------------------------------------------------------------------------------------------------------------------------------------------------------------------------------------------------------------------------------------------------------------------------------------------------------------------------------------------------------------------------------------------------------------------------------------------------------------------------------------------------------------------------------------------------------------------------------------------------------------------------------------------------------------------------------------------------------------------------------------------------------------------------------------------------------------------------------------------------------------------------------------------------------------------------------------------------------------------------------------------------------------------------------------------------------------|
| pGB1963 | pXMCS5 | pXMCS5-YFP-PdeA      | <p>agacgaccatATGAGCAAGGGCGAGGAGCTGTTACCGGGGTGGTGCCCATCTGGTTCGAGCTGGA<br/> CGGCGACGTAAACGGCCACAAGTTTACGCGTGTCCGGCGAGGGCGAGGGCGATGCCACCTACGGC<br/> AAGCTGACCCTGAAGTTCATCTGCACCACCGGCAAGCTGCCCGTGCCTGGCCACCCTCGTGAC<br/> CACCTTCGGCTACGGCCTGCAGTGCTTCGCCCGCTACCCCGACCACATGAAGCAGCAGACTTCTT<br/> CAAGTCCGCCATGCCGAAGGCTACGTCCAGGAGCGACCATCTTCTTCAAGGACGACGGCAACT<br/> ACAAGACCCGCGCCGAGGTGAAGTTCGAGGGCGACACCCTGGTGAACCGCATCGAGCTGAAGG<br/> GCATCGACTTCAAGGAGGACGGCAACATCTGGGGCACAAGCTGGAGTACAACATAACAGCCA<br/> CAACGTCTATATCATGGCCGACAAGCAGAAGAACGGCATCAAGGTGAAGTCAAGATCCGCCACA<br/> ACATCGAGGACGGCAGCGTGCAGCTCGCCGACACTACCAGCAGAACACCCCATCGGCGACGG<br/> CCCCGTGCTGCTGCCGACAACACTACCTGAGCTACCAGTCCGCCCTGAGCAAAGACCCCAACG<br/> AGAAGCGCGATCACATGGTCTCTGCTGGAGTTCTGTGACCGCCGCGGGGATCACTCTCGGCATGGAC<br/> GAGCTGTACAAGGGAAGTAGCGGTGCGTCTTTTCGGACAGGGCAACGACGAATCTGGGACGCGA<br/> CGGCCACGCTTGAGGGCGCTGGGCGCGGGACGTCGCCCTGTGGATCTGGGAGCCCGAAACCG<br/> ACAGTTTGCCTGTAACGGCGCGGCGCGCCTTGGGCCTTGGGCCGCTGGCGCCTGAATGCTC<br/> GTCGGCCGCTTCCGCGCCCTGGCCCTGCCGAGGATCGCGCCAGGCCGAAGAGGTCTGAAG<br/> CCGCGTGAACCGGGCAGCGAAGTCTGTCGCCGTTTCCGCGTGCAGCGCGGGCAGACTGCTCT<br/> GGCGCGCGTCTGGCTGGAAGAGGGCGTGCAGCGCCGCGCGTCTGGCGCCGAAACGAAT<br/> TCTCCGCTCCGAGCTTTCGACCTGACCGGACTTCTGGACCGTGCAGCTTCTCGCCCGCGCC<br/> GCGAGCGCTGGCGCAGGAGGGGACCCACAGTTTGGTCTGCGCCGACCTCGACCGACTGCGTCC<br/> CCTGAACGAGGGCGTGGTTCACGAGCGCGGACCTAGTCTGGCGGGCTGGGCTCGCGCCTG<br/> GCGGCGCGTTCGCCGCCAGTCGATCCTGGGCCGATCGGCGAGGACGAGTTCGCCGTTCTCT<br/> GCCAGCCGCTCGGCTACGAACCTCCGATGTGCTGCGCAGCGCGTGGAGCAGCCGCTGCGCGT<br/> GGCCGCTTTGATATTCACCCGACCCTGTGATCGGCGCGGTCTCGGCCGAAGCGCGCCTGGACG<br/> CGCCGACGCGCCGAAGTCTGCGCCGCGCGAAGTGGCGTGCAGGCCCGCCGCGCCGCGG<br/> GCCGAGGCGCGCGGCCGCTATGGCCGGCGATGGAGACCGACGGCTGTGCGCCTGGCGC<br/> TGGAGGCTGATCTGCGCGCGCCATTGGTTCGGGGCGAGATCACGCCCTACTCCAGCCGATCGTG<br/> CGGCTGTGACCGGGCGCCCTGTCCGGCTTCGAGGCCCTGGCCGCTGGATCCATCCGCGCCGGG<br/> GCATGCTGCCGCCGGACGAGTTCTGCCGCTGATCGAAGAGATGGGGCTGATGAGCGAGCTCGG<br/> CGCGCATGATGCACGCCGCCGCCAGCAGCTGTGACCTGGCGCGCCGCTACCCGGCGATGG<br/> GGAACCTGACTGTCAGCGTCAACCTGTCGACCGGCGAGATCGACCGCCCGGCTGGTCCGCGA<br/> CGTGCCGAGACCCTGCGGGTCAATCGCTGCCGCGCGGCCCTGAAGCTGGAAGTACCAGAA<br/> AGCGACATCATGCGGATCCCGAACGGGCCCGGTGATCCTGAAGACGCTGCGCGACGCGGGCG<br/> CAGGGCTTGCCTGGACGACTTCGGCACCGGCTTCTGTCGCTGTGATCCTGACGCGCCTGCCG<br/> TTCGACACGCTGAAGATCGACCGCTACTTCTGCCACCATGGGCAATAACGCCGGCTCGGCCAA<br/> GATCGTCCGCTCGGTGGTCAAGCTGGGCCAGGATCTGGATCTGGAAGTCTGCGCGAAGGGGTC<br/> GAGAACGCCGAGATGGCGCATGCGCTGCAATCGTGGGCTGTGACTATGGCCAAGGCTTTGGCTA<br/> TGCGCCGGCCCTGTGCGCCGAGGAGGCCGAGGTCTATCTGAACGAGGCCTATGTGACGGCGCC<br/> GCGCCGGTGAAGGCGCGGGTTAAggtaccacgt</p> |
| pGB1964 | pXMCS5 | pXMCS5-HA-CtrA RD+15 | <p>agacgaccatATGTACCCATACGATGTTCCAGATTACGCAGGAAGTTCGCTACTGTTGATCGAGGATG<br/> ACAGCGCGACGGCGCAGACCATCGAAGTATGCTGAAGTCTGAAGGCTTCAACGTCTATACGACG<br/> GATCTGGGTGAAGAAGGCGTCGATCTGGGCAAGATCTACACTACGATCTTATCCTGCTCGACCTC<br/> AATCTCCGGACATGAGCGGCATCGATGTTCTGCGCACCTGCGGGTTCGGAAGATCAACACGCC<br/> CATCATGATCCTGTGCGGCTCGTCGAAATCGACACCAAGGTCAAGACCTTCGCCGGCGGGCGCCG<br/> ACGACTACATGACCAAGCCGTTCCACAAGGACGAAATGATCGCCCGCATCCACGCGGTGGTCCGT<br/> GGCTATGTGCTGCGCGACCCGAACGAGCAGGTTAACGCCGCTGAggtaccacgt</p>                                                                                                                                                                                                                                                                                                                                                                                                                                                                                                                                                                                                                                                                                                                                                                                                                                                                                                                                                                                                                                                                                                                                                                                                                                                                                                                                                                                                                                                                                                                                                                                                                                                                                                                                                                                                                                                                                                                                                                                                                                                                                                                                                                |
| pGB1965 | pXMCS5 | pXMCS5-HA-TacA       | <p>agacgaccatATGTACCCATACGATGTTCCAGATTACGCAGGAAGTACCAAAACGGTCTTGTGCTCG<br/> ATGACGACCCGACACAACGTCGGTTGATTCAAGCGGTGCTCGAGCGCGACGGGTTCCGGTCTC<br/> GCACGCGGAAGGCGGCGACGCGGCGATCGCGCACCTGACGTCCGGCGCGCCCGCCGATGTCATC<br/> CTGCTGGATCTCGTATGCTGCTCAACGGTTCAGGACGCCCTGAAGGAAATGCGCGCCCGCGG<br/> CTTCAACCAGCCCGTATCGTGTGACGCGCCAGCGGTGGCGTGCACACCGTGGTCAAGGCCATGC<br/> AGGCCGGCGCCTGCGACTTCTTATCAAGCCCGCCTCGCCGAGCGGATCACCGTGTGATCCGC<br/> AACGCCCTGTGATGGGCGACCTCAAGGGCGAGGTTCGAGCGGCTGACCAAGCGCGCGGGCGGC<br/> AAGACCACCTTCGCGGACCTGATCGGCGCCTCGCCGGTTCATGACCATGGTCAAGCGCATGGGCGA<br/> GCGGGCCGCAAGAGCGGTATCCCGGTGCTGATACCGGCGAAAGCGGCGTGGCAAGGAGCT<br/> GATCGCCCGCGCCGTCACGGCTTCTCCGACCGCGCCGCAAGCCGTTTGTGCGGGTCAACTGCG</p>                                                                                                                                                                                                                                                                                                                                                                                                                                                                                                                                                                                                                                                                                                                                                                                                                                                                                                                                                                                                                                                                                                                                                                                                                                                                                                                                                                                                                                                                                                                                                                                                                                                                                                                                                                                                                                                                                                                                                |

|                |                     |                 |                                                                                                                                                                                                                                                                                                                                                                                                                                                                                                                                                                                                                                                                                                                                                                                                                                                                                                                                                                                                                                                                                                                                                                                                                                                                                                                                                                                                                                                                                                                                                                                                                                                                                                                                                                                                                                                                                                                        |
|----------------|---------------------|-----------------|------------------------------------------------------------------------------------------------------------------------------------------------------------------------------------------------------------------------------------------------------------------------------------------------------------------------------------------------------------------------------------------------------------------------------------------------------------------------------------------------------------------------------------------------------------------------------------------------------------------------------------------------------------------------------------------------------------------------------------------------------------------------------------------------------------------------------------------------------------------------------------------------------------------------------------------------------------------------------------------------------------------------------------------------------------------------------------------------------------------------------------------------------------------------------------------------------------------------------------------------------------------------------------------------------------------------------------------------------------------------------------------------------------------------------------------------------------------------------------------------------------------------------------------------------------------------------------------------------------------------------------------------------------------------------------------------------------------------------------------------------------------------------------------------------------------------------------------------------------------------------------------------------------------------|
|                |                     |                 | <p>GCGCGATCCCCGAGAACCTCGTCGAGTCGATCCTGTTTCGGCCACGAGAAGGGCTCGTTCACCGGC<br/> GCCACCGACAAGCATCTGGGCAAGTTCAAGGAGGCCGACGGCGGCACCCTGTTCTCGATGAGG<br/> TCGGCGAGCTGCCGCTCGACATGCAGGTCAAGCTGCTGCGCGCCTGCAGGAGGGCGAGATCGA<br/> CCCGATCGGCTCCAAGCGCTCGATCAAGGTCGATGTCGGGATCGTGTGCGGACCAATCGCGATCT<br/> GCAGCAGGCCGTTTCGGGCGGCCGTTCCGCGAAGACCTGTTTTATCGCCTGAACGTGTTCCCGA<br/> TCGAGGGCGCCGTCCCTGCGCGAGCGTGCAGGACATCCCGGCCCTCGTCGAGGGCTTATCCGC<br/> CGTTCAACGTGAAGAAGGCAAGCGCGTGCAGGCGCTCGCCGAGACGATGCAACTGCTGA<br/> CCAGCTTCGACTGGCCCGCAATGTGCGCAACTGAAAAACACCGTCTATCGCGCCATCGTGTG<br/> GCCGATGCGCCCTATCTGCAGCCGTTGACTTCCCGGCGATCTCGGGCCTGGCCGCGCCGATCGA<br/> GGCCGTATCGATCTGCCCTCGCCGCCGCTGCAGCCCTGTTGCAAGCCACGCATGCGGGCATGG<br/> CCGCCGCGTGCAGAGGGCGCTGTGCGCATCTCGACGATCGCGGTACCTGCGGACCCTGGAG<br/> GAGATCGAGCGGACCTCATCCAGCATGCGATCGACGTCTATGCCGGCCACATGAGCGAGGTGCG<br/> GCGGCTTTGGGCATCGGTGCTCGACCTCTATCGCAAGGTTGCGGAGCAGGGCATCGAAGTCG<br/> ACATGAAGGAAGCGGGCTGA<del>aggtaccagt</del></p>                                                                                                                                                                                                                                                                                                                                                                                                                                                                                                                                                                                                                                                                                                                                                                                                                                                                                                                                      |
| <b>pGB1966</b> | pXMCS5              | pXMCS5-HA-PdeA  | <p><del>agacgaccat</del>ATGTACCCATACGATGTTCCAGATTACGCAGGAAGTTCTTTTCGGACAGGCCAAGCAGC<br/> GAATCTGGGACGCGACGGCCACGCTTGAGGCGCTGGGCGCGGGACGTCGCCCTGTGGATCTG<br/> GGAGCCCGAAACCGACAGGTTGCGTCTGAACGGCGCGGCGCGCCTTGGGCCTTGGGCCGCT<br/> GGCGCCTGAATGCTCGTGGCCGCTTCCGCGCCTGGCCCTGCCGAGGATCGCGCCAGGCCG<br/> AAGAGTCTGAAGCCGCGTGAACGGGCGAGCGAAGTCGTCGCCGTTTCCGCGTGCAGGGCG<br/> GCGAGACTGCCTTGGCGCGCGTCTGGCTGGAAGAGGGCGTGCAGCGCCGCGGCGTCTGCG<br/> CGCCGAAACGAAATCTCCGCGTCCGAGCTTTCGACCTGACCGGACTTCTGGACCGTGCAGC<br/> TTCTCGCCCGCGCCCGGAGCGCCTGGCGCAGGAGGGGACCCACAGTTGGTCTGCGCCGACC<br/> TCGACCGACTGCGTGCCTGAACGAGGCGTGGGTACGAGCGCGCGGACCTAGTCTGGCGGC<br/> GCTGGGCTCGCGCCTGGCGGCGGCTTCCCGGCCAGTCGATCCTGGGCCGATCGGCGAGGAC<br/> GAGTTCGCCGTTCTTCCAGCCGCTCGGCTACGAACCCTCCGATGTGCTGCGCAGCGCGTGA<br/> GCAGCCGCTGCGCGTGGCCGGCTTTGATATCACCCGACCCTGTCGATCGGCGCGGTCTCGGCCG<br/> AAGCGGCCTGGACGCGCCGACGCCGCCAACTGCTGCGCCGCGCGAACTGGCCGTCGAGG<br/> CCGCCGCGCCGCGGCGGAGGCGCGCGGCCGCTATGGCCGGGCGATGGAGACCGACGGCC<br/> TGTCGCGCCTGGCGTGGAGGCTGATGTCGCGGCGCCATTGGTGGGGCGAGATCACGCCCTAC<br/> TTCCAGCCGATCGTGCAGGCTGTCGACCGGCGCCCTGTCCGGCTTCGAGGCCCTGGCCGCTGGAT<br/> CCATCCGCGCCGGGGCATGCTGCCGCGGACGAGTTCTGCCGCTGATCGAAGAGATGGGGCTG<br/> ATGAGCGAGCTCGGCGCGCACATGATGCACGCCGCCAGCAGCTGTCGACCTGGCGCGCCG<br/> CTCACCCGGCGATGGGGAACCTGACTGTGACGCTCAACCTGTCGACCGGCGAGATCGACCGGCC<br/> GGCCTGGTCCCGACGTGGCCGAGACCCTGCGGGTCAATCGCCTGCCGCGCGGCGCCCTGAAGC<br/> TGGAAGTACCAGAAAGCGACATCATGCGGATCCCGAACGGGCGCCGCTGATCCTGAAGACGCTG<br/> CGGACGCGGGCGCAGGGCTTGCCTGGACGACTTCGGCACCGGCTTCTGTCGCTGTCGTACCT<br/> GACGCGCCTGCCGTTTCGACACGCTGAAGATCGACCGCTACTTCGTCGCCACCATGGGAATAACG<br/> CCGGCTCGGCCAAGATCGTCCGCTCGGTGGTCAAGCTGGGCCAGGATCTGGATCTGGAAGTCGTC<br/> GCCGAAGGGTTCGAGAACGCCGAGATGGCGCATGCGCTGCAATCGCTGGGCTGTGACTATGGCC<br/> AAGGCTTTGGCTATGCGCCGCCCTGTGCGCGAGGAGGCCGAGGTCTATCTGAACGAGGCCTAT<br/> GTCGACGGCGCCGCGCGGTTAAGGCGCGGGTTAA<del>aggtaccagt</del></p> |
| <b>pGB1967</b> | pVMCS6 (NdeI, KpnI) | pVMCS6-ClpX-GFP | <p><del>ggaaacgcat</del>ATGACGAAAGCCGCGAGCGGCGACACGAAAAGCACCCCTGTACTGCTTTTCTGCGG<br/> AAAGAGCCAACATGAGGTGCGCAAGCTCATCGCGGACCGACGGTGTTCATTTGCGATGAATGCG<br/> TCGAGCTCTGCATGGACATCATCCGCGAAGAGCACAAGATCGCCTTCGTAAGTCTAAGGACGCG<br/> GTCCCGACGCCGCGCAAACTGCGAAGTCTGGATGATTACGTGATCGGTCAAGGTCACGCCAA<br/> GAAGTCTTCGCGGTGCGAGTGCACAATCACTACAAGCGGTGAACCACGCTTCAAGAATAACG<br/> ACGTCGAACTGGCCAAGTGAACATCCTGCTGGTCCGTTCCGACCGGTACGGGTAAGACCCTGCTG<br/> GCGCAGACGCTGGCCGAATCATCGACGTTCCGTTACGATGGCGGACGCCACGACGCTGACCGA<br/> AGCCGTTACGTCGGCGAAGACGTCGAGAATCATGCTGTAAGCTGCTGAGGCCGCCGACTAC<br/> AACGTCGAGCGCGCCAGCGCGGCATCGTCTACATCGACGAAATCGACAAGATCAGCCGCAAGTC<br/> CGACAACCCGTCGATCACTCGCGACGTGTCGGGCGAGGGCGTGCAGCAGGCTCTGCTGAAGATC<br/> ATGGAAGGCACGGTCCCTCCGTGCCGCCGAGGGCGGGCGCAAGCATCCTCAGCAGGAGTTCC<br/> TGCAGGTCGACACGACGAACATCTGTTTATCTGTGGCGGCGCCTTCGCTGGCCTGGAGAAGATC<br/> ATCTCGGCGCGCGGCGGCCAAGTCGATCGGCTTCGGCGCAAGGTGACCGATCCCGAAGAGC<br/> GCCGACGGGCGAGATCCTTCGGAACGTCGAGCCCGACGACTGCAGCGTTTCGGCCTGATCCC</p>                                                                                                                                                                                                                                                                                                                                                                                                                                                                                                                                                                                                                                                                                                                                                                                                                                                                                                   |



|         |                                   |                                  |                                                                                                                                                                                                                                                                                                                                                                                                                                                                                                                                                                                                                                                                                                                                                                                                                                                                                                                                                                                                                                                                                                                                                                                                                                                                                                                                                                                                            |
|---------|-----------------------------------|----------------------------------|------------------------------------------------------------------------------------------------------------------------------------------------------------------------------------------------------------------------------------------------------------------------------------------------------------------------------------------------------------------------------------------------------------------------------------------------------------------------------------------------------------------------------------------------------------------------------------------------------------------------------------------------------------------------------------------------------------------------------------------------------------------------------------------------------------------------------------------------------------------------------------------------------------------------------------------------------------------------------------------------------------------------------------------------------------------------------------------------------------------------------------------------------------------------------------------------------------------------------------------------------------------------------------------------------------------------------------------------------------------------------------------------------------|
|         |                                   |                                  | <p>GGAGTTCATCGGCCGCTGCGCGTGGTCGCCACGCTGGAGGATCTGGACGAGGCCGCCCTGGTC<br/> AAGATCCTGACCGAGCCGAAGAACGCCTTCGTCAAGCAGTATCAGCGCCTGTTTCGAGATGGAGAA<br/> CATCGGCCTGACCTTACCGAAGACGCTCTGCATCAGGTGGCCAAGAAGGCTATCGCGCGAAGA<br/> CCGGCGCGCGGCCTGCGCTCGATCATGGAAGGCATCCTGCTGGAGACCATGTTTGAAGTCCG<br/> ACCTACGAGGGCGTCGAGGAAGTGGTGGTCAACGCCGAGGTCGTCGAAGGCCGGGCTCAGCCG<br/> CTGCTGATCTATGCCGAGAAAAAGGGTGGGGCGGCATCGGCCGGAAGTAGTAAAGGTGAAGAAC<br/> TGTTACCCGGTGTGTTCCGATCCTGGTTGAACTGGATGGTATGTTAACGGCCACAAATTCTCTGT<br/> TCGTGGTGAAGGTGAAGGTGATGCAACCAACGGTAAACTGACCCTGAAATTCATCTGCACTACCG<br/> GTAAACTGCCGGTCCATGGCCGACTCTGGTACTACCCTGACCTATGGTGTTCAGTGTTCCTCTCG<br/> TTACCCGGATCACATGAAGCAGCATGATTTCTTCAAATCTGCAATGCCGGAAGGTTATGTACAGGA<br/> GCGCACCATTTCTTCAAAGACGATGGCACCTACAAAACCCGTGCAGAGGTTAAATTTGAAGGTG<br/> ATACTCTGGTGAACCGTATTGAACTGAAAGGCATTGATTTCAAAGAGGACGGCAACATCCTGGGC<br/> CACAAACTGGAATATAACTCAACTCCCATAACGTTTACATCACCGCAGACAAACAGAAGAACGGT<br/> ATCAAAGCTAACTTCAAATTCGCCATAACGTTGAAGACGGTAGCGTACAGCTGGCGGACCACTAC<br/> CAGCAGAACACTCCGATCGGTGATGGTCCGGTTCTGCTGCCGGATAACCACTACCTGTCACCCAG<br/> TCTAAACTGTCAAAGACCCGAACGAAAAGCGCGACCACATGGTGCTGCTGGAGTTCGTTACTGC<br/> AGCAGGTATCACGCACGGCATGGATGAACTCTACAAATAGggtaccacgt</p>                                                                                                                                                                            |
| pGB1968 | pVMCS6                            | pVMCS6-<br>RcdA-GFP              | <p>ggaaacgcatATGACCGAAGTGAACGCGTTCGCGGACACGCTTGGCGCGCTGGAGTATCCAGGA<br/> TTTCGCGCGATCGGAACTGTTCCGACCGGACGTTTCGAGGAAGGCATGCAACTGGTAGAAGAGACC<br/> GCCGCTATCTCGACGGGGCCGGACGCCATGACAGCAAGGTCCTCTCAGCAACGCCGCCCTGGG<br/> CTACGCCACCGAAAGCATGCGCCTGACCACGCGCCTGATGCAGGTCGCTCCTGGCTTTTGGTGC<br/> AGCGCGCCGTACGTGAAGGCGAGATGCCGCCGAAGCCGCTGCGTGAAGCCTATCGCCTGGC<br/> CGAAGAGGCCCGCCGATGGTCCGGCCGTCGAGGAAGTCCGTTTGGCCTGATGAACCTGCTG<br/> CAGCGCTCCGAGCGCCTGTACGAGCGCGTCCGCCACCTGGACCGCCGATGATGTCGAGTCGCC<br/> GAACGAAGAAGCGCCGCGTCCGGTTCAGAACCAGCTCGATCGCTTACGCGCGCGTTCGGAGGC<br/> AGCGGCGCGCGCGCAGTAAAGGTGAAGAAGTTCACCCGGTGTGTTCCGATCCTGGTTGAAC<br/> TGGATGGTATGTTAACGGCCACAAATCTCTGTTCTGTTGGTGAAGGTGAAGGTGATGCAACCAAC<br/> GGTAAACTGACCCTGAAATTCATCTGCACTACCGGTAAGTCCCGGTTCCATGGCCGACTCTGGTG<br/> ACTACCCTGACCTATGGTGTTCAGTGTTCCTGTTACCCGGATCACATGAAGCAGCATGATTTCTT<br/> CAAATCTGCAATGCCGGAAGGTTATGTACAGGAGCGCACCATTTCTTCAAAGACGATGGCACCTA<br/> CAAAACCCGTGCAGAGGTTAAATTTGAAGGTGATACTCTGGTGAACCGTATTGAACTGAAAGGCA<br/> TTGATTTCAAAGAGGACGGCAACATCCTGGGCCACAACTGGAATATAACTTCAACTCCCATAACG<br/> TTTACATCACCGCAGACAAACAGAAGAACGGTATCAAAGCTAACTTCAAATTCGCCATAACGTTG<br/> AAGACGGTAGCGTACAGCTGGCGGACCACTACCAGCAGAACACTCCGATCGGTGATGGTCCGGTT<br/> CTGCTGCCGGATAACCACTACCTGTCCACCCAGTCTAAACTGTCAAAGACCCGAACGAAAAGCGC<br/> GACCACATGGTGCTGCTGGAGTTCGTTACTGCAGCAGGTATCACGCACGGCATGGATGAACTCTAC<br/> AAATAGggtaccacgt</p> |
| pGB1969 | pACYC-<br>duet<br>(NcoI,<br>XhoI) | pACYC-<br>CpdR-TEV-<br>GFP-6XHis | <p>gagatataccATGGCAAGAATTCTCTCGTGAAGATGATGATTCTCTGAGAGGATTCTGGCTAGAG<br/> CTCTGGAAAGAGCTGGATTGAAGTCCAGGCTTGCCTGATGGAGAAGAAGCTGTCCAGCACCT<br/> GGATCATCCTTGGGATCTGCTGCTGACAGATATTGTCATGCTGGAATGGATGGAATTGAAGTGGC<br/> TAGACAGGCTGCTGCTAGAGATCCGAGTCTGAGAATTATGTTTATTACAGGATTGCTGCTGTGGCT<br/> CTCTCGGCTCAGGATAGAGCTCCTGCTGGAGCTAAGGTGCTGAGTAAGCCTGTGCACCTGAGAGA<br/> TCTCGTCTGTAAGTCGAAAAGATGATGGCTGCTGAAAACCTGTATTTTACGGGTAGCAGTAAAG<br/> GTGAAGAACTGTTACCCGGTGTGTTCCGATCCTGGTTGAACTGGATGGTATGTTAACGGCCACA<br/> AATTCCTGTTCGTGGTGAAGGTGAAGGTGATGCAACCAACGGTAAACTGACCCTGAAATTCATCT<br/> GCACTACCGGTAAACTGCCGGTCCATGGCCGACTCTGGTACTACCCTGACCTATGGTGTTCAGT<br/> GTTTTCTCGTTACCCGGATCACATGAAGCAGCATGATTTCTTCAAATCTGCAATGCCGGAAGGTTA<br/> TGTACAGGAGCGCACCATTTCTTCAAAGACGATGGCACCTACAAAACCCGTGCAGAGGTTAAAT<br/> TGAAGGTGATACTCTGGTGAACCGTATTGAACTGAAAAGGCATTGATTTCAAAGAGGACGGCAACA<br/> TCCTGGGCCACAACTGGAATATAACTTCAACTCCCATAACGTTTACATCACCGCAGACAAAACAGA<br/> AGAACGGTATCAAAGCTAACTTCAAATTCGCCATAACGTTGAAGACGGTAGCGTACAGCTGGCG<br/> GACCACTACCAGCAGAACACTCCGATCGGTGATGGTCCGGTTCTGCTGCCGGATAACCACTACCTG<br/> TCCACCCAGTCTaaaCTGTCAAAGACCCGAACGAAAAGCGCGACCACATGGTGCTGCTGGAGTTC<br/> GTTACTGCAGCAGGTATCACGCACGGCATGGATGAACTCTACAAACACCATACCATACCATAGc<br/> tcgagctcg</p>                                                                                                                                        |

|                |                |                                                       |                                                                                                                                                                                                                                                                                                                                                                                                                                                                                                                                                                                                                                                                                                                                                                                                                                                                                                                                                                                                                                                                                                                                                                                        |
|----------------|----------------|-------------------------------------------------------|----------------------------------------------------------------------------------------------------------------------------------------------------------------------------------------------------------------------------------------------------------------------------------------------------------------------------------------------------------------------------------------------------------------------------------------------------------------------------------------------------------------------------------------------------------------------------------------------------------------------------------------------------------------------------------------------------------------------------------------------------------------------------------------------------------------------------------------------------------------------------------------------------------------------------------------------------------------------------------------------------------------------------------------------------------------------------------------------------------------------------------------------------------------------------------------|
| <b>pGB1970</b> | pACYC-<br>duet | pACYC-<br>CpdR <sub>D51A</sub> -<br>TEV-GFP-<br>6XHis | <p><b>gagatatacc</b>ATGGCAAGAATTCTCTCGCTGAAGATGATGATTCTCTGAGAGGATTCTGGCTAGAGCTCTGGAAAGAGCTGGATTTGAAGTCCAGGCTTGCCTGATGGAGAAGAAGCTGTCCAGCACCTGGATCATCCTTGGGATCTGCTGCTGACAGCCATTGTCATGCCTGGAATGGATGGAATTGAAGTGCC TAGACAGGCTGCTGCTAGAGATCCGAGTCTGAGAATTATGTTTATTACAGGATTTGCTGCTGTGGCTCTCTCGGCTCAGGATAGAGCTCCTGCTGGAGCTAAGGTGCTGAGTAAGCCTGTGCACCTGAGAGATCTCGCTGAAGTCGAAAAGATGATGGCTGCTGAAAACCTGTATTTTCAGGGTAGCAGTAAAGGTGAAGAACTGTTACCCGGTGTGTTCCGATCCTGTTGAACTGGATGGTGTGTTAACGGCCACA AATTCTCTGTTCTGTTGAAGGTGAAGGTGATGCAACCAACGGTAAACTGACCCTGAAATTCATCTGCACTACCCGTAACCTGCCGTTCCATGGCCGACTCTGGTGACTACCTGACCTATGGTGTTCAGTGTGTTTCTCGTTACCCGGATCAGATGAAGCAGCATGATTTCTTCAAATCTGCAATGCCGGAAGGTTA TGACAGGAGCGCACCATTTCTTTCAAAGACGATGGCACCTACAAAACCCGTGCAGAGGTTAAATTGAAAGTGATACTCTGGTGAACCGTATTGAACTGAAAGGCATTGATTTCAAAGAGGACGGCAACA TCCTGGGCCACAACTGGAATATAACTTCAACTCCATAACGTTTACATCACCGCAGACAAAACAGAAGAACGGTATCAAAGCTAACTTCAAATTCGCCATAACGTTGAAAGACGGTAGCGTACAGCTGGCGGACCACTACCAGCAGAACTCCGATCGGTGATGGTCCGTTCTGCTGCCGATAACCACTACCTGTCCACCCAGTCTaaaCTGTCAAAGACCCGAACGAAAAGCGCGACCACATGGTGCTGCTGGAGTTCTTACTGCAGCAGGTATCACGCACGGCATGGATGAACTCTACAAACACCATCACCATCACCATTAGc</p> <p><b>tcgagtctg</b></p> |
| <b>pGB2010</b> |                | pBXMCS2-<br>pCpdR CpdR                                | <p><b>agacgaccat</b>TCACGGTTCAGATCCACATAGGCGCGGGCGAAGCGGGCGCGCACCCACGGCGGCCCCAGGGCGGGCGCGCCGCGGATGATGCGGTCGACAAACGCGTCTCGGACGCGCGCAGGGTCTC GAGCGGCAGGCGGACCGCGGCGACCATGTCTCCGGATAGAGGTCGCCGAGTGCGGCGAGGC GAACACCAAGGCGGTGCGCGGGCGCCCGGCCGGGACCGCGCGCAGCACCTGAAACGCTGG CCCGCCAAAGGTCTCAGCGGCGGGGACGAAAGCTCTTCGCTCGAAAGGGGCCACGCGCTC ATGCCGCATCATCGAAGCGTCCGCGCGGGGTCAAATCTCAATCGCCGCTGACGAAACATCCCC AGCCGCGACGTTTAGGTTTACCCGATTTACGGACGGGGCGATAAGGTGGATCCTCTATCGACGA TCTTAATCGGACACGTGACCCatgGCCCGCATCTCTCGCCGAAGACGATGATTCCTGCGCGGC TTCCTGGCCCCGCGCTGGAACGCGCCGGTTCGAAAGTCCAGGCCTGCGCCGACGGCGAAGAGG CCGTCCAGCACCTGGACCATCCCTGGGACCTGCTGCTGACCGACATCGTCATGCCGGCATGGACG GCATCGAGGTGGCCCGCAGGCCCGCCCGCGACCCGTCCCTGCGCATCATGTTTATCACCGGC TTCGCCCGGTGGCCCTCTCGGCCAGGACCGCGCGCCCGGCCGCGCAAGGTGCTGTCCAAGC CCGTGCACCTGCGCGACCTCGTCGCCGAGGTGCGAAAAGATGATGGCGGCC<b>tgagaattcctgc</b></p>                                                                                                                                                                                                                                                                                                         |
| <b>pGB2011</b> |                | pBXMCS2-<br>pCpdR<br>CpdR <sub>D51A</sub>             | <p><b>agacgaccat</b>TCACGGTTCAGATCCACATAGGCGCGGGCGAAGCGGGCGCGCACCCACGGCGGCCCCAGGGCGGGCGCGCCGCGGATGATGCGGTCGACAAACGCGTCTCGGACGCGCGCAGGGTCTC GAGCGGCAGGCGGACCGCGGCGACCATGTCTCCGGATAGAGGTCGCCGAGTGCGGCGAGGC GAACACCAAGGCGGTGCGCGGGCGCCCGGCCGGGACCGCGCGCAGCACCTGAAACGCTGG CCCGCCAAAGGTCTCAGCGGCGGGGACGAAAGCTCTTCGCTCGAAAGGGGCCACGCGCTC ATGCCGCATCATCGAAGCGTCCGCGCGGGGTCAAATCTCAATCGCCGCTGACGAAACATCCCC AGCCGCGACGTTTAGGTTTACCCGATTTACGGACGGGGCGATAAGGTGGATCCTCTATCGACGA TCTTAATCGGACACGTGACCCatgGCCCGCATCTCTCGCCGAAGACGATGATTCCTGCGCGGC TTCCTGGCCCCGCGCTGGAACGCGCCGGTTCGAAAGTCCAGGCCTGCGCCGACGGCGAAGAGG CCGTCCAGCACCTGGACCATCCCTGGGACCTGCTGCTGACCGCCATCGTCATGCCGGCATGGACG GCATCGAGGTGGCCCGCAGGCCCGCCCGCGACCCGTCCCTGCGCATCATGTTTATCACCGGC TTCGCCCGGTGGCCCTCTCGGCCAGGACCGCGCGCCCGGCCGCGCAAGGTGCTGTCCAAGC CCGTGCACCTGCGCGACCTCGTCGCCGAGGTGCGAAAAGATGATGGCGGCC<b>tgagaattcctgc</b></p>                                                                                                                                                                                                                                                                                                         |

|         |  |                                                     |                                                                                                                                                                                                                                                                                                                                                                                                                                                                                                                                                                                                                                                                                                                                                                                                                                                                                                                                                                                                                                                                                                                                                                                                                                                                                                                                                                                                                                                                                                                                                                                                                                                                                                                                                                                                                                                                                                                                                                                                                                                                                                                                                                                                                                                                                                                                                                                                                                                                                                                                                                                                                                                                                                                                                                                                                                                                                                                                                                                                                                                                                                                                                                                                                                                                                   |
|---------|--|-----------------------------------------------------|-----------------------------------------------------------------------------------------------------------------------------------------------------------------------------------------------------------------------------------------------------------------------------------------------------------------------------------------------------------------------------------------------------------------------------------------------------------------------------------------------------------------------------------------------------------------------------------------------------------------------------------------------------------------------------------------------------------------------------------------------------------------------------------------------------------------------------------------------------------------------------------------------------------------------------------------------------------------------------------------------------------------------------------------------------------------------------------------------------------------------------------------------------------------------------------------------------------------------------------------------------------------------------------------------------------------------------------------------------------------------------------------------------------------------------------------------------------------------------------------------------------------------------------------------------------------------------------------------------------------------------------------------------------------------------------------------------------------------------------------------------------------------------------------------------------------------------------------------------------------------------------------------------------------------------------------------------------------------------------------------------------------------------------------------------------------------------------------------------------------------------------------------------------------------------------------------------------------------------------------------------------------------------------------------------------------------------------------------------------------------------------------------------------------------------------------------------------------------------------------------------------------------------------------------------------------------------------------------------------------------------------------------------------------------------------------------------------------------------------------------------------------------------------------------------------------------------------------------------------------------------------------------------------------------------------------------------------------------------------------------------------------------------------------------------------------------------------------------------------------------------------------------------------------------------------------------------------------------------------------------------------------------------------|
| pGB2012 |  | <p>pBXMCS2-<br/>pXyl-CckA<br/>H+ pCpdR<br/>CpdR</p> | <p>agacgaccatATGGCCGACTTGCAGCTCCAGGACAAGGTTTCGACCGGCGCCCCGCGTCGGCGGTTT<br/> GATCCATGGCTGGTCGGCGCGGCGGTGTTTTTCGTGGCTGCGGCGGCCCTCTCGGCGGCGCCGG<br/> CGCTCAAGGCCGGACCGACCACCTGGCCGGCCTGCTGCTGCTTCTGGGCGTCGCGGGCGTGCC<br/> TGTGTTGGGCCTTGTGCGCATTGCGGGCTCAGCGCTTTCGGCGGGCGACGCCGACCAGGCTGAG<br/> GGGTTTCATCGAGGCGCTGGCCGAGCCGGCCGCTGGCCGCCGACGGTTCGCTCCTGGCCG<br/> CCAACGGGCGCTGGCGCGAAGTCATGGGCGAACAGCGCCGCTGCCAAGGGCGTGCCGGGCT<br/> CCAGCCTGTTTGGCGCCCTGGTCCAGGCGCGCCAGGGGCGAGATGGCCGAGGGCATGCTGAGCGC<br/> TGGAGGAACCGACTATACCGCCAAGGTCTCGCGCCTTGGGGCGGACGGCTGATGATCCGGCTTG<br/> CGCCCATCGTTGTGCTGAGCCGGTTGTGGAAGACGCGTCGCCGGCCCCGGTCCGCGAGCGCGC<br/> CGCCCCGCCACCCAGCTCGCTGGACGCCTTCCGCGGAGCCTCGCCGTTGGGCGCGGCCCTGCTGG<br/> AAGGCTTGAGCCGTTACCTCGCGGGTGTGGAGACCAATCCGGCGCTGACCACGATGACCGG<br/> CGCCAAGGCCGGTGTGCTGTTCCGGCGATCTGATCGACGCCGCTCGCGCGCCGAGGCCGAGACG<br/> CGCTGAACGAAGGCCGCGCCGGTCCCTACGAGGTGCGGTTGGCGCGCGATCCGTCGCGCATCG<br/> CTCACCTTTACCTCTATCGCGCCGAAGGCCGCTGGTGGCTACATGATCGACGTGTCCGAGCAGA<br/> AGCAGATCGAGCTGCAGCTGTCCAGGCCAGAAATGCAGGCCATCGCCAGCTGGCCGGCGG<br/> CGTCGCGCACGACTTCAACAACCTTTGACCGCCATCCAGCTGCGTCTGGACGAGTTGCTGCATCG<br/> CCATCCCGTCGGTGATCCGTGTCGACGAGGTCTCAACGAGATCCGTGACGCGGGCGTGCGCGCCG<br/> CCGACCTCGTGCGAAGCTCTTGGCTTCTCGCGCAAGCAGACCGTGCAGCGCGAGGTGCTGGAT<br/> CTGGGCGAGCTGATCAGCGAGTTCGAGGTCTTGTGCGCCGCTGCTGCGCGAAGACGTCAAGC<br/> TGATCACCGACTATGGCCGCGACCTGCCGAGGTGCGCGCCGACAAGAGCCAGCTCGAGACGGC<br/> GGTCATGAACCTGGCGTCAACGCCCGCGACCGCTGCGCGCGGCCAAGGGCGGCGGCGTCTGT<br/> GCGCATCCGACCGCGCGCCTGACCCGCGACGAGGCATCCAGCTGGGTTTCCCGGCCCGGAC<br/> GGCGACACGGCCTTCATTGAGGTCAGTGACGATGGTCCGGGATTCCGCCGACGTCATGGGCAA<br/> GATCTTCGACCGTTCTTACCACCAAGCCGGTGGGCGAGGGTACGGGCTAGGCCTAGCCACGG<br/> TCTATGGCATCGTTAAGCAGAGCGACGGCTGGATTACGTCCACAGCCGTCCGAACGAAGGCGCG<br/> GCCTTCCGATCTTCTGCGGTCTATGAAGCGCCCGCGGCGGTCGCGTCCAGGCCGTCGC<br/> CGAGCCCGCAAGCCGCGCGCCGCTCGCGACCTGTCGGGCGCCGGCCGATCCTGTTCTGTCGAG<br/> GACGAGGACCGCTGCGCAGCGTCGCCGCCGCTGCTGCGCGCCGTTGGCTACGAGGTGCTTG<br/> AGGCGGCCGACGGCGAAGAGGCCCTGATCATCGCCGAGGAAAACGCCGGCACGATCGACCTCTT<br/> GATCAGCGACGTGATCATGCCCGCATCGACGCCCCGACCTTGTGAAGAAGGCGCGTGGCTATC<br/> TGGGGACCGCGCCGGTGTGTTTCATCTCCGGTATGCCGAGGCCGAGTTCAGCGACCTCTTGAA<br/> GGCGAGACGGGCGTGACCTTCTCCCAAGCCGATCGACATCAAGACCCTGGCCGAGCGCGTCA<br/> AGCAGCAGCTGCAAGCAGCATAGtctgtgtatttaacgaatcttgattcgTACGGTTCAGATCCACATAG<br/> GCGCGGGCGAAGCGGGCGCGCACACGGCGGCCCCAGGGCGGGCGCGCCGCGGATGATGCG<br/> GTCGACAAACGCGTCTCGGACGCGCGCAGGGTCTCGAGCGGCGAGGCGGACCGCGGCGACCAT<br/> GTCCTCCGGATAGAGGTGCGCCGAGTGCGGCGAGGCGAACACCAAGGCGGTGCGCGGCGGCGC<br/> CCCGGCCGGGACCGCGCGCAGCACCTCGAACGCTGGCCCGCCAAAGGTCTCCAGCGGCGGGGA<br/> CGAAAGCTCTTCTGTCGAAAGGGGCCGACGCGCTCATGCCGATCATCGAAGCGTCGCGGCGC<br/> GGGGTCAAATCTCAATCGCCGCTGACGAAACATCCCCAGCCGCGACGTTTAGGTTTCATCCCGATT<br/> TACGAGCGGGGCGATAAGGTGGATCCTCTATCGACGATCTTAATCGGACACGTGACCCCatgGCC<br/> GCATCCTCCTCGCCGAAGACGATGATTCCCTGCGCGGCTTCTGGCCCGCGCGCTGGAACGCGCC<br/> GGCTTCGAAGTCCAGGCCTGCGCCGACGGCGAAGAGGCCGTCCAGCACCTGGACCATCCCTGGG<br/> ACCTGCTGCTGACCGACATCGTCATGCCGGCATGGACGGCATCGAGGTGGCCCGCAGGCCGCGC<br/> GCCCGCGACCCGTCCTGCGCATCATGTTTCATCACCGCTTCCCGCCGTGGCCCTCTCGGCCAG<br/> GACCGCGCGCCCGCGGCGCCAAGGTGCTGTCCAAGCCGTGCACCTGCGCGACCTGTCGCGC<br/> AGGTCGAAAAGATGATGGCGGCCtgagaattcctgc</p> |
|---------|--|-----------------------------------------------------|-----------------------------------------------------------------------------------------------------------------------------------------------------------------------------------------------------------------------------------------------------------------------------------------------------------------------------------------------------------------------------------------------------------------------------------------------------------------------------------------------------------------------------------------------------------------------------------------------------------------------------------------------------------------------------------------------------------------------------------------------------------------------------------------------------------------------------------------------------------------------------------------------------------------------------------------------------------------------------------------------------------------------------------------------------------------------------------------------------------------------------------------------------------------------------------------------------------------------------------------------------------------------------------------------------------------------------------------------------------------------------------------------------------------------------------------------------------------------------------------------------------------------------------------------------------------------------------------------------------------------------------------------------------------------------------------------------------------------------------------------------------------------------------------------------------------------------------------------------------------------------------------------------------------------------------------------------------------------------------------------------------------------------------------------------------------------------------------------------------------------------------------------------------------------------------------------------------------------------------------------------------------------------------------------------------------------------------------------------------------------------------------------------------------------------------------------------------------------------------------------------------------------------------------------------------------------------------------------------------------------------------------------------------------------------------------------------------------------------------------------------------------------------------------------------------------------------------------------------------------------------------------------------------------------------------------------------------------------------------------------------------------------------------------------------------------------------------------------------------------------------------------------------------------------------------------------------------------------------------------------------------------------------------|

|         |  |                                                                    |                                                                                                                                                                                                                                                                                                                                                                                                                                                                                                                                                                                                                                                                                                                                                                                                                                                                                                                                                                                                                                                                                                                                                                                                                                                                                                                                                                                                                                                                                                                                                                                                                                                                                                                                                                                                                                                                                                                                                                                                                                                                                                                                                                                                                                                                                                                                                                                                                                                                                                                                                                                                                                                                                                                                                                                                                                                                                                                                                                                                                                                                                                                                                                                                                                                                                |
|---------|--|--------------------------------------------------------------------|--------------------------------------------------------------------------------------------------------------------------------------------------------------------------------------------------------------------------------------------------------------------------------------------------------------------------------------------------------------------------------------------------------------------------------------------------------------------------------------------------------------------------------------------------------------------------------------------------------------------------------------------------------------------------------------------------------------------------------------------------------------------------------------------------------------------------------------------------------------------------------------------------------------------------------------------------------------------------------------------------------------------------------------------------------------------------------------------------------------------------------------------------------------------------------------------------------------------------------------------------------------------------------------------------------------------------------------------------------------------------------------------------------------------------------------------------------------------------------------------------------------------------------------------------------------------------------------------------------------------------------------------------------------------------------------------------------------------------------------------------------------------------------------------------------------------------------------------------------------------------------------------------------------------------------------------------------------------------------------------------------------------------------------------------------------------------------------------------------------------------------------------------------------------------------------------------------------------------------------------------------------------------------------------------------------------------------------------------------------------------------------------------------------------------------------------------------------------------------------------------------------------------------------------------------------------------------------------------------------------------------------------------------------------------------------------------------------------------------------------------------------------------------------------------------------------------------------------------------------------------------------------------------------------------------------------------------------------------------------------------------------------------------------------------------------------------------------------------------------------------------------------------------------------------------------------------------------------------------------------------------------------------------|
| pGB2013 |  | <p>pBXMCS2-<br/>pXyl-CckA<br/>H+ pCpdR<br/>CpdR<sub>D51A</sub></p> | <p>agacgaccatATGGCCGACTTGCAGCTCCAGGACAAGGTTTCGACCGGCGCCCCGCGTCGGCGGTTT<br/> GATCCATGGCTGGTTCGGCGCGGCGGTGTTTTTCGTGGCTGCGGCGGCCCTCTCGGCGGCGCCGG<br/> CGCTCAAGGCCGGACCGACCAACCTGGCCGGCCTGCTGCTGCTTCTGGGCGTCGCGGGCGTGCC<br/> TGTGTTGGGCCTTGTGCGCATTGCGGGCTCAGCGCTTTCGGCGGGCGACGCCGACCAAGGCTGAG<br/> GGGTTTCATCGAGGCGCTGGCCGAGCCGGCCGCTGGCCGCCGACGGTTCGCTCCTGGCCG<br/> CCAACGGGCCCTGGCGCGAAGTCATGGGCGAACAGCGCCGCTGCCAAGGGCGTGCCGGGGCT<br/> CCAGCCTGTTTTCGGCCCTGGTCCAGGCGCGCAGGGGCGAGATGGCCGAGGGCGATGCTGAGCGC<br/> TGGAGGAACCGACTATACCGCAAGGTCTCGCGCCTTGGGGCGGACGGCTGATGATCCGGCTTG<br/> CGCCCATCGTTGTGCTGAGCCGGTTGTGGAAGACGCGTCGCCGGCCCCGGTTCGCCGAGCGCGC<br/> CGCCCCGCCACCCAGCTCGCTGGACGCCTTCCGGGAGCCTCGCCGTTGGGCGCGGCCCTGCTGG<br/> AAGGCTTGAGCCGTTACCTCGCGGGTGTGGAGACCAATCCGGCGCTGACCACGATGACCGG<br/> CGCCAAGGCCGGTGTGCTGTTCCGGCGATCTGATCGACGCCGCTCGCGCGCCGAGGCCGAGACG<br/> CGCTGAACGAAGGCCGCGCCGGTCCCTACGAGGTGCGGTTGGCGCGCGATCCGTCGCGCATCG<br/> CTCACCTTTACCTCTATCGCGCCGAAGGCCGCTGGTGGCCTACATGATCGACGTGTCCGAGCAGA<br/> AGCAGATCGAGCTGCAGCTGTCCAGGCCAGAAATGCAGGCCATCGCCAGCTGGCCGGCGG<br/> CGTCGCGCACGACTTCAACAACCTTTGACCGCCATCCAGCTGCGTCTGGACGAGTTGCTGCATCG<br/> CCATCCCGTCGGTGATCCGTGTCACGAGGGTCTCAACGAGATCCGTGACAGGGCGTGCAGCGCCG<br/> CCGACCTCGTGCAGCTCTTGGCTTCTCGCGCAAGCAGACCGTGCAGCGCGAGGTGCTGGAT<br/> CTGGGCGAGCTGATCAGCGAGTTCGAGGTCTTGTGCGCCGCTGCTGCGCGAAGACGTCAAGC<br/> TGATCACCGACTATGGCCGCGACCTGCCGAGGTGCGCGCCGACAAGAGCCAGCTCGAGACGGC<br/> GGTCATGAACCTGGCGTCAACGCCCGCGACCGCTGCGCGCGGCCAAGGGCGCGGCGTCTG<br/> GCGCATCCGACCGCGCGCCTGACCCGCGACGAGGCGATCCAGCTGGGTTTCCCGGCCCGGAC<br/> GGCGACACGGCCTTCATTGAGGTCAGTGACGATGGTCCGGGATTCCGCCGACGTCATGGGCAA<br/> GATCTTCGACCGTTCTTACCACCAAGCCGGTGGGCGAGGGTACGGGCTAGGCCTAGCCACGG<br/> TCTATGGCATCGTTAAGCAGAGCGACGGCTGGATTACGTCCACAGCCGTCGAACGAAGGCCGCG<br/> GCCTTCCGATCTTCTGCCGTCTATGAAGCGCCCGCGCGCGGTGCGCGTCCAGGCCGTCGCG<br/> CGAGCCCGCAAGCCGCGCGCCGCTCGCGACCTGTCGGGCGCCGGCCGATCCTGTTCTGTCGAG<br/> GACGAGGACCGCTGCGCAGCGTCGCCGCCGCTGCTGCGCGCCGTTGGCTACGAGGTGCTTG<br/> AGGCGGCCGACGGCGAAGAGGCCCTGATCATCGCCGAGGAAAACGCCGGCACGATCGACCTCTT<br/> GATCAGCGACGTGATCATGCCCGCATCGACGCCCCGACCTTGTGAAGAAGGCGCGTGGCTATC<br/> TGGGGACCGCGCCGGTGTGTTTCATCTCCGGTATGCCGAGGCCGAGTTCAGCGACCTCTTGAA<br/> GGCGAGACGGGCGTGACCTTCTCCCAAGCCGATCGACATCAAGACCTGGCCGAGCGCGTCA<br/> AGCAGCAGCTGCAAGCAGCATAGtctgtgtatttcaacgaatcttgattcgTACGGTTCAGATCCACATAG<br/> GCGCGGGCGAAGCGGGCGCGCACACGGCGGCCCCAGGGCGGGCGCGCCGCGGATGATGCG<br/> GTCGACAAACGCGTCTCGGACGCGCGCAGGGTCTCGAGCGGCGAGGCGGACCGCGGCGACCAT<br/> GTCCTCCGGATAGAGGTGCGCCGAGTGCGGCGAGGCGAACACCAAGGCGGTGCGCGGCGGCGC<br/> CCCGGCCGGGACCGCGCGCAGCACCTCGAACGCTGGCCCGCCAAAGGTCTCCAGCGGCGGGGA<br/> CGAAAGCTCTTCTCGTAAAGGGGCCGACGCGCTCATGCCGATCATGAAGCGTGCAGGCGC<br/> GGGGTCAAATCTCAATCGCCGCTGACGAAACATCCCCAGCCGCGACGTTTAGGTTTCATCCCGATT<br/> TACGACGGGGCGATAAGGTGGATCCTCTATCGACGATCTTAATCGGACACGTGACCCCatgGCC<br/> GCATCCTCCTCGCCGAAGACGATGATTCCCTGCGCGGCTTCTGGCCCGCGCGTGAACGCGCC<br/> GGCTTCGAAGTCCAGGCTGCGCCGACGGCGAAGAGGCCGTCCAGCACCTGGACCATCCCTGGG<br/> ACCTGCTGCTGACCGCCATCGTCATGCCGGCATGGACGGCATCGAGGTGGCCCGCAGGCCGCGC<br/> GCCCGCGACCCGTCCTGCGCATCATGTTTCATCACCAGGCTTCGCCCGCGTGGCCCTCTCGCCAG<br/> GACCGCGCGCCCGCGGCCAAGGTGCTGTCCAAGCCGTGACCTGCGCGACCTGTCGCGC<br/> AGGTCGAAAAGATGATGGCGGCCtgagaattcctgc</p> |
|---------|--|--------------------------------------------------------------------|--------------------------------------------------------------------------------------------------------------------------------------------------------------------------------------------------------------------------------------------------------------------------------------------------------------------------------------------------------------------------------------------------------------------------------------------------------------------------------------------------------------------------------------------------------------------------------------------------------------------------------------------------------------------------------------------------------------------------------------------------------------------------------------------------------------------------------------------------------------------------------------------------------------------------------------------------------------------------------------------------------------------------------------------------------------------------------------------------------------------------------------------------------------------------------------------------------------------------------------------------------------------------------------------------------------------------------------------------------------------------------------------------------------------------------------------------------------------------------------------------------------------------------------------------------------------------------------------------------------------------------------------------------------------------------------------------------------------------------------------------------------------------------------------------------------------------------------------------------------------------------------------------------------------------------------------------------------------------------------------------------------------------------------------------------------------------------------------------------------------------------------------------------------------------------------------------------------------------------------------------------------------------------------------------------------------------------------------------------------------------------------------------------------------------------------------------------------------------------------------------------------------------------------------------------------------------------------------------------------------------------------------------------------------------------------------------------------------------------------------------------------------------------------------------------------------------------------------------------------------------------------------------------------------------------------------------------------------------------------------------------------------------------------------------------------------------------------------------------------------------------------------------------------------------------------------------------------------------------------------------------------------------------|

### Supplementary Table 3

| File # | Diffusion Coefficients |        |          |          |             |        |         |         | PopZ Microdomain Size |             |
|--------|------------------------|--------|----------|----------|-------------|--------|---------|---------|-----------------------|-------------|
|        | Top Cell               |        |          |          | Bottom Cell |        |         |         | Top Cell              | Bottom Cell |
|        | Y_cyto                 | R_cyto | Y_pole   | R_pole   | Y_cyto      | R_cyto | Y_pole  | R_pole  |                       |             |
| 1      | 20                     | 20     | 0.5      | 0.5      | 20          | 20     | 0.5     | 0.5     | 0.50%                 | 0.125%      |
| 2      | 20                     | 20     | 0.5      | 0.5      | 20          | 20     | 0.5     | 0.5     | 0.50%                 | 2.000%      |
| 3      | 20                     | 20     | 0.5      | 0.5      | 20          | 20     | 0.5     | 0.5     | 0.50%                 | 0.125%      |
| 4      | 20                     | 20     | 0.5      | 0.5      | 20          | 20     | 0.5     | 0.5     | 0.50%                 | 2.000%      |
| 5      | 20                     | 20     | 20       | 20       | 20          | 20     | 5       | 5       | 0.50%                 | 0.50%       |
| 6      | 20                     | 20     | 20       | 20       | 20          | 20     | 2       | 2       | 0.50%                 | 0.50%       |
| 7      | 20                     | 20     | 0.5      | 0.5      | 20          | 20     | 0.125   | 0.125   | 0.50%                 | 0.50%       |
| 8      | 20                     | 20     | 0.5      | 0.5      | 20          | 20     | 0.05    | 0.05    | 0.50%                 | 0.50%       |
| 9      | 20                     | 20     | 0.05     | 0.05     | 20          | 20     | 0.005   | 0.005   | 0.50%                 | 0.50%       |
| 10     | 20                     | 20     | 0.0005   | 0.0005   | 20          | 20     | 0.00005 | 0.00005 | 0.50%                 | 0.50%       |
| 11     | 20                     | 20     | 0.000005 | 0.000005 | 20          | 20     | 0       | 0       | 0.50%                 | 0.50%       |
| 12     | 20                     | 20     | 0.000005 | 0.000005 | 20          | 20     | 5E-07   | 5E-07   | 0.50%                 | 0.50%       |
| 13     | 20                     | 20     | 5E-08    | 5E-08    | 20          | 20     | 5E-09   | 5E-09   | 0.50%                 | 0.50%       |
| 15     | 20                     | 20     | 0.5      | 0.5      | 20          | 20     | 0.5     | 0.5     | 0.50%                 | 4.000%      |
| 16     | 20                     | 20     | 0.5      | 0.5      | 20          | 20     | 0.5     | 0.5     | 15.00%                | 40.000%     |
| 17     | 0.5                    | 0.5    | 0.5      | 0.5      | 0.5         | 0.5    | 20      | 20      | 100.00%               | 60.000%     |
| 18     | 20                     | 20     | 0.5      | 0.5      | 20          | 20     | 0.5     | 0.5     | 0.50%                 | 0.000%      |
| 19     | 20                     | 20     | 2        | 2        | 20          | 20     | 0.125   | 0.125   | 0.50%                 | 0.50%       |

Particle diffusion and PopZ microdomain size parameters for Smoldyn files. Each file includes simulations for two different cells, labeled top and bottom. Y and R denote yellow and red colored particles, respectively, in bulk cytoplasm (cyto) and in PopZ microdomains (pole). PopZ microdomain size is expressed as a percentage of total cell volume.

#### Supplementary Table 4

| <u>File Name</u> | <u>Top Cell</u>     | <u>(description)</u>                             | <u>Bottom Cell</u>  | <u>(description)</u>                                |
|------------------|---------------------|--------------------------------------------------|---------------------|-----------------------------------------------------|
| 9E               | $\Delta popZ$       | All Difcs at pole =<br>Difc in cytoplasm         | normal              | Models wildtype cell<br>No Sub1-PopZ<br>interaction |
| 9I               | $\Delta popZ$       | All Difcs at pole =<br>Difc in cytoplasm         | normal              | Models wildtype cell<br>+ Sub1-PopZ<br>interaction  |
| 9J               | RcdA <sup>mut</sup> | RcdA Difc at pole =<br>RcdA Difc in<br>cytoplasm | CpdR <sup>mut</sup> | CpdR Difc at pole =<br>CpdR Difc in<br>cytoplasm    |
| 9K               | $\Delta cpdR$       | Zero CpdR particles                              | $\Delta rcdA$       | Zero RcdA particles                                 |
| 9L               | 2% pole volume      | Pole occupies 2% of<br>total cell volume         | 1/160 Difc          | All Difcs at pole =<br>1/160 Difc in<br>cytoplasm   |

Descriptions of Smoldyn files associated with Fig. 6c and Supplementary Fig. 8c. Each file includes simulations for two different cells, labeled top and bottom. 9J, 9K, and 9L variants are changed relative to the Normal cell in File 9I, which is described in the right-hand panel in Fig. 6c. The parameters used for the Normal cell are described in Methods.

### Supplementary References:

1. Evinger, M. & Agabian, N. Envelope-associated nucleoid from *Caulobacter crescentus* stalked and swarmer cells. *J Bacteriol* 132, 294–301 (1977).
2. Bowman, G. R. *et al.* A Polymeric Protein Anchors the Chromosomal Origin/ParB Complex at a Bacterial Cell Pole. *Cell* 134, 945–955 (2008).
3. Bowman, G. R. *et al.* Oligomerization and higher-order assembly contribute to sub-cellular localization of a bacterial scaffold. *Molecular Microbiology* 90, 776–795 (2013).
4. Ryan, K. R., Judd, E. M. & Shapiro, L. The CtrA Response Regulator Essential for *Caulobacter crescentus* Cell-cycle Progression Requires a Bipartite Degradation Signal for Temporally Controlled Proteolysis. *Journal of Molecular Biology* 324, 443–455 (2002).
5. Iniesta, A. A., McGrath, P. T., Reisenauer, A., McAdams, H. H. & Shapiro, L. A phospho-signaling pathway controls the localization and activity of a protease complex critical for bacterial cell cycle progression. *Proc Natl Acad Sci U S A* 103, (2006).
6. Perez, A. M. Assembly of a Sub-Cellular Protein Complex Generates Asymmetry in the Bacterium *Caulobacter crescentus*. (Stanford University, 2015).
7. Holmes, J. A. *et al.* *Caulobacter* PopZ forms an intrinsically disordered hub in organizing bacterial cell poles. *Proc Natl Acad Sci U S A* 113, 12490–12495 (2016).
8. McGrath, P. T., Iniesta, A. A., Ryan, K. R., Shapiro, L. & McAdams, H. H. A Dynamically Localized Protease Complex and a Polar Specificity Factor Control a Cell Cycle Master Regulator. *Cell* 124, 535–547 (2006).
