# Supplementary material for: Phospho-signaling couples polar asymmetry and proteolysis within a membraneless microdomain in Caulobacter crescentus
Source: PubMed Central journal article supplement (PMC11519897; doi:10.1038/s41467-024-53395-y), 2024-10-28
Supplement: 41467_2024_53395_MOESM8_ESM.pdf [file 41467_2024_53395_MOESM8_ESM.pdf]

## Reporting Summary

Nature Portfolio wishes to improve the reproducibility of the work that we publish. This form provides structure for consistency and transparency in reporting. For further information on Nature Portfolio policies, see our [Editorial Policies](#) and the [Editorial Policy Checklist](#).

### Statistics

For all statistical analyses, confirm that the following items are present in the figure legend, table legend, main text, or Methods section.

- | n/a                                 | Confirmed                                                                                                                                                                                                                                                                                      |
|-------------------------------------|------------------------------------------------------------------------------------------------------------------------------------------------------------------------------------------------------------------------------------------------------------------------------------------------|
| <input type="checkbox"/>            | <input checked="" type="checkbox"/> The exact sample size ( $n$ ) for each experimental group/condition, given as a discrete number and unit of measurement                                                                                                                                    |
| <input type="checkbox"/>            | <input checked="" type="checkbox"/> A statement on whether measurements were taken from distinct samples or whether the same sample was measured repeatedly                                                                                                                                    |
| <input type="checkbox"/>            | <input checked="" type="checkbox"/> The statistical test(s) used AND whether they are one- or two-sided<br><i>Only common tests should be described solely by name; describe more complex techniques in the Methods section.</i>                                                               |
| <input checked="" type="checkbox"/> | <input type="checkbox"/> A description of all covariates tested                                                                                                                                                                                                                                |
| <input type="checkbox"/>            | <input checked="" type="checkbox"/> A description of any assumptions or corrections, such as tests of normality and adjustment for multiple comparisons                                                                                                                                        |
| <input type="checkbox"/>            | <input checked="" type="checkbox"/> A full description of the statistical parameters including central tendency (e.g. means) or other basic estimates (e.g. regression coefficient) AND variation (e.g. standard deviation) or associated estimates of uncertainty (e.g. confidence intervals) |
| <input type="checkbox"/>            | <input checked="" type="checkbox"/> For null hypothesis testing, the test statistic (e.g. $F$ , $t$ , $r$ ) with confidence intervals, effect sizes, degrees of freedom and $P$ value noted<br><i>Give <math>P</math> values as exact values whenever suitable.</i>                            |
| <input checked="" type="checkbox"/> | <input type="checkbox"/> For Bayesian analysis, information on the choice of priors and Markov chain Monte Carlo settings                                                                                                                                                                      |
| <input checked="" type="checkbox"/> | <input type="checkbox"/> For hierarchical and complex designs, identification of the appropriate level for tests and full reporting of outcomes                                                                                                                                                |
| <input checked="" type="checkbox"/> | <input type="checkbox"/> Estimates of effect sizes (e.g. Cohen's $d$ , Pearson's $r$ ), indicating how they were calculated                                                                                                                                                                    |

*Our web collection on [statistics for biologists](#) contains articles on many of the points above.*

### Software and code

Policy information about [availability of computer code](#)

Data collection

Data analysis

For manuscripts utilizing custom algorithms or software that are central to the research but not yet described in published literature, software must be made available to editors and reviewers. We strongly encourage code deposition in a community repository (e.g. GitHub). See the Nature Portfolio [guidelines for submitting code & software](#) for further information.

### Data

Policy information about [availability of data](#)

All manuscripts must include a [data availability statement](#). This statement should provide the following information, where applicable:

- Accession codes, unique identifiers, or web links for publicly available datasets
- A description of any restrictions on data availability
- For clinical datasets or third party data, please ensure that the statement adheres to our [policy](#)

## Research involving human participants, their data, or biological material

Policy information about studies with [human participants or human data](#). See also policy information about [sex, gender \(identity/presentation\), and sexual orientation](#) and [race, ethnicity and racism](#).

|                                                                    |                |
|--------------------------------------------------------------------|----------------|
| Reporting on sex and gender                                        | Not applicable |
| Reporting on race, ethnicity, or other socially relevant groupings | Not applicable |
| Population characteristics                                         | Not applicable |
| Recruitment                                                        | Not applicable |
| Ethics oversight                                                   | Not applicable |

Note that full information on the approval of the study protocol must also be provided in the manuscript.

## Field-specific reporting

Please select the one below that is the best fit for your research. If you are not sure, read the appropriate sections before making your selection.

Life sciences  Behavioural & social sciences  Ecological, evolutionary & environmental sciences

For a reference copy of the document with all sections, see [nature.com/documents/nr-reporting-summary-flat.pdf](https://www.nature.com/documents/nr-reporting-summary-flat.pdf)

## Life sciences study design

All studies must disclose on these points even when the disclosure is negative.

|                 |                                                                                                                                                                                                                                                                                                                                                                                                                                                                                                                                                                                                                                                                                                                                                                                                                                                                                                                                                                                                                                                                                                                                                                                                                                                                                                                                                                                                                                                                                                                                                                                                                                                                                                                                                                                                                                                                                                                                                                                                                                                                                          |
|-----------------|------------------------------------------------------------------------------------------------------------------------------------------------------------------------------------------------------------------------------------------------------------------------------------------------------------------------------------------------------------------------------------------------------------------------------------------------------------------------------------------------------------------------------------------------------------------------------------------------------------------------------------------------------------------------------------------------------------------------------------------------------------------------------------------------------------------------------------------------------------------------------------------------------------------------------------------------------------------------------------------------------------------------------------------------------------------------------------------------------------------------------------------------------------------------------------------------------------------------------------------------------------------------------------------------------------------------------------------------------------------------------------------------------------------------------------------------------------------------------------------------------------------------------------------------------------------------------------------------------------------------------------------------------------------------------------------------------------------------------------------------------------------------------------------------------------------------------------------------------------------------------------------------------------------------------------------------------------------------------------------------------------------------------------------------------------------------------------------|
| Sample size     | <p>Fig. 1b, n&gt;300/time point for the bar chart.<br/>           Fig. 1c, Samples from experiment shown in 1b.<br/>           Fig. 1e, Representative images.<br/>           Fig. 1f, Samples from experiment shown in 1e,f.<br/>           Fig. 1g, Representative image.<br/>           Fig. 1h, n&gt;300/types of cell.<br/>           Fig. 2b, Representative images; n=60 per cell types for the graphs.<br/>           Fig. 2c, Samples from experiment shown in 2b.<br/>           Fig. 2d, Representative images; n=10 per cell types for the graphs.<br/>           Fig. 3a, Not applicable<br/>           Fig. 3b, Representative images.<br/>           Fig. 3c, Samples from experiment shown in 2d.<br/>           Fig. 3d, n&gt;20 per types of condensates.<br/>           Fig. 4c, Representative images.<br/>           Fig. 4d, n&gt;300/types of cell.<br/>           Fig. 5a, Representative images.<br/>           Fig. 5b, Representative images; n=20 per cell types for the graphs.<br/>           Fig. 5c, Representative gel images; n=3 for the graphs.<br/>           Fig. 6a-c, Not applicable.<br/>           Supplementary Fig. 1a, n=2<br/>           Supplementary Fig. 1b, n=3<br/>           Supplementary Fig. 1c, n=3<br/>           Supplementary Fig. 2a, n=3<br/>           Supplementary Fig. 2b, Representative images; n=60 per cell types for the graphs.<br/>           Supplementary Fig. 2c, Representative images.<br/>           Supplementary Fig. 2d, Representative images; n=10 per cell types for the graphs.<br/>           Supplementary Fig. 3a-b, Not applicable.<br/>           Supplementary Fig. 4 a-c, Representative images.<br/>           Supplementary Fig. 5a, Representative images, n=20 per cell types for the graph.<br/>           Supplementary Fig. 5b, Representative images, n=20 per cell types for the graph.<br/>           Supplementary Fig. 6a, Representative gel images, n=3 for the graphs.<br/>           Supplementary Fig. 7a, n=3.<br/>           Supplementary Fig. 8a-c, Not applicable.</p> |
| Data exclusions | 4 c, Last two time points were not shown in the graphs as the signals were no higher than the background.                                                                                                                                                                                                                                                                                                                                                                                                                                                                                                                                                                                                                                                                                                                                                                                                                                                                                                                                                                                                                                                                                                                                                                                                                                                                                                                                                                                                                                                                                                                                                                                                                                                                                                                                                                                                                                                                                                                                                                                |
| Replication     | Fig. 1b, 5-10 images from a single representative experiment which was repeated two times and produced similar results;<br>Fig. 1c, Experiment was repeated two times and produced similar results.                                                                                                                                                                                                                                                                                                                                                                                                                                                                                                                                                                                                                                                                                                                                                                                                                                                                                                                                                                                                                                                                                                                                                                                                                                                                                                                                                                                                                                                                                                                                                                                                                                                                                                                                                                                                                                                                                      |

Fig. 1e, Experiment was repeated three times and produced similar results.  
 Fig. 1f, Experiment was repeated three times and produced similar results.  
 Fig. 1g, Experiment was repeated three times and produced similar results.  
 Fig. 1h, Experiment was repeated three times and produced similar results.  
 Fig. 2b, Experiment was repeated three times and produced similar results.  
 Fig. 2c, Experiment was repeated three times and produced similar results.  
 Fig. 3b, Experiment was repeated three times and produced similar results.  
 Fig. 3c, Experiment was repeated three times and produced similar results.  
 Fig. 4c-d, Experiment was repeated three times and produced similar results.  
 Fig. 5a, Experiment was repeated three times and produced similar results.  
 Fig. 5b, Experiment was repeated three times and produced similar results.  
 Fig. 5c, Experiment was repeated three times and produced similar results.  
 Fig. 6a-c, Representative data from individual runs. In this model, we observed no significant variation between runs initiated with same parameters.  
 Supplementary Fig. 1a-c, Experiment was repeated three times and produced similar results.  
 Supplementary Fig. 2a-b, Experiment was repeated three times and produced similar results.  
 Supplementary Fig. 2d, Experiment was repeated three times and produced similar results.  
 Supplementary Fig. 4a-c, Experiment was repeated three times and produced similar results.  
 Supplementary Fig. 5a-b, Experiment was repeated three times and produced similar results.  
 Supplementary Fig. 8a-b, Representative data from individual runs. In this model, we observed no significant variation between runs initiated with same parameters.

Randomization

Blinding

## Reporting for specific materials, systems and methods

We require information from authors about some types of materials, experimental systems and methods used in many studies. Here, indicate whether each material, system or method listed is relevant to your study. If you are not sure if a list item applies to your research, read the appropriate section before selecting a response.

### Materials & experimental systems

| n/a                                 | Involvement                                            |
|-------------------------------------|--------------------------------------------------------|
| <input type="checkbox"/>            | <input checked="" type="checkbox"/> Antibodies         |
| <input checked="" type="checkbox"/> | <input type="checkbox"/> Eukaryotic cell lines         |
| <input checked="" type="checkbox"/> | <input type="checkbox"/> Palaeontology and archaeology |
| <input checked="" type="checkbox"/> | <input type="checkbox"/> Animals and other organisms   |
| <input checked="" type="checkbox"/> | <input type="checkbox"/> Clinical data                 |
| <input checked="" type="checkbox"/> | <input type="checkbox"/> Dual use research of concern  |
| <input checked="" type="checkbox"/> | <input type="checkbox"/> Plants                        |

### Methods

| n/a                                 | Involvement                                     |
|-------------------------------------|-------------------------------------------------|
| <input checked="" type="checkbox"/> | <input type="checkbox"/> ChIP-seq               |
| <input checked="" type="checkbox"/> | <input type="checkbox"/> Flow cytometry         |
| <input checked="" type="checkbox"/> | <input type="checkbox"/> MRI-based neuroimaging |

## Antibodies

Antibodies used

Validation

## Plants

Seed stocks

Novel plant genotypes

Authentication
